# Supplementary material for: Cytotoxic alkaloids from the marine shellfish-associated fungus Aspergillus sp. XBB-4 induced by an amino acid-directed strategy
Source: Royal Society of Chemistry journal article supplement (doi:10.1039/c9ra10306f), 2020-01-01
Supplement: c9ra10306f1.pdf [file c9ra10306f1.pdf]

## Supporting Information

### **Cytotoxic Alkaloids from Marine Shellfish-Associated Fungus *Aspergillus* sp. XBB-4 Induced by Amino Acid-directed Strategy**

Yi Qiu,<sup>a</sup> Qi Guo,<sup>a</sup> Yan-Qin Ran,<sup>b</sup> Wen-Jian Lan,<sup>c</sup> Chi-Keung Lam,<sup>a</sup> Gong-Kan Feng,<sup>d</sup> Rong Deng,<sup>d</sup> Xiao-Feng Zhu,<sup>d</sup> Hou-Jin Li\*<sup>a</sup> and Liu-Ping Chen\*<sup>a</sup>

<sup>a</sup> School of Chemistry, Sun Yat-sen University, Guangzhou 510275, China. E-mail: ceslhj@mail.sysu.edu.cn; cesclp@mail.sysu.edu.cn

<sup>b</sup> School of Traditional Chinese Medicine, Guangdong Pharmaceutical University, Guangzhou 510006, China

<sup>c</sup> School of Pharmaceutical Sciences, Sun Yat-sen University, Guangzhou 510006, China

<sup>d</sup> State Key Laboratory of Oncology in South China, Collaborative Innovation Center for Cancer Medicine, Cancer Center, Sun Yat-sen University, Guangzhou 510060, China

## Contents

|                                                                                                                                                                 |    |
|-----------------------------------------------------------------------------------------------------------------------------------------------------------------|----|
| <b>Figure S1.</b> HR-ESI-MS spectrum of aspercarboline A ( <b>1</b> ).....                                                                                      | 4  |
| <b>Figure S2.</b> <sup>1</sup> H NMR spectrum (500 MHz, acetone- <i>d</i> <sub>6</sub> ) spectrum of aspercarboline A ( <b>1</b> ) .....                        | 5  |
| <b>Figure S3.</b> <sup>13</sup> C NMR spectrum (125 MHz, acetone- <i>d</i> <sub>6</sub> ) of aspercarboline A ( <b>1</b> ).....                                 | 6  |
| <b>Figure S4.</b> DEPT 135 spectrum (125 MHz, acetone- <i>d</i> <sub>6</sub> ) of aspercarboline A ( <b>1</b> ) .....                                           | 7  |
| <b>Figure S5.</b> DEPT 90 spectrum (125 MHz, acetone- <i>d</i> <sub>6</sub> ) of aspercarboline A ( <b>1</b> ) .....                                            | 8  |
| <b>Figure S6.</b> HSQC spectrum of aspercarboline A ( <b>1</b> ).....                                                                                           | 9  |
| <b>Figure S7.</b> <sup>1</sup> H- <sup>1</sup> H COSY spectrum of aspercarboline A ( <b>1</b> ).....                                                            | 10 |
| <b>Figure S8.</b> HMBC spectrum of aspercarboline A ( <b>1</b> ).....                                                                                           | 11 |
| <b>Figure S9.</b> HR-ESI-MS spectrum of aspercarboline B ( <b>2</b> ).....                                                                                      | 12 |
| <b>Figure S10.</b> <sup>1</sup> H NMR spectrum (400 MHz, CDCl <sub>3</sub> ) of aspercarboline B ( <b>2</b> ) .....                                             | 13 |
| <b>Figure S11.</b> <sup>13</sup> C NMR spectrum (100 MHz, CDCl <sub>3</sub> ) of aspercarboline B ( <b>2</b> ) .....                                            | 14 |
| <b>Figure S12.</b> DEPT 135 spectrum (100 MHz, CDCl <sub>3</sub> ) of aspercarboline B ( <b>2</b> ).....                                                        | 15 |
| <b>Figure S13.</b> DEPT 90 spectrum (100 MHz, CDCl <sub>3</sub> ) of aspercarboline B ( <b>2</b> ).....                                                         | 16 |
| <b>Figure S14.</b> HSQC spectrum of aspercarboline B ( <b>2</b> ).....                                                                                          | 17 |
| <b>Figure S15.</b> <sup>1</sup> H- <sup>1</sup> H COSY spectrum of aspercarboline B ( <b>2</b> ).....                                                           | 18 |
| <b>Figure S16.</b> HMBC spectrum of aspercarboline B ( <b>2</b> ).....                                                                                          | 19 |
| <b>Figure S17.</b> HR-ESI-MS spectrum of aspercarboline C ( <b>3</b> ).....                                                                                     | 20 |
| <b>Figure S18.</b> <sup>1</sup> H NMR spectrum (400 MHz, DMSO- <i>d</i> <sub>6</sub> ) of aspercarboline C ( <b>3</b> ).....                                    | 21 |
| <b>Figure S19.</b> <sup>13</sup> C NMR spectrum (100 MHz, DMSO- <i>d</i> <sub>6</sub> ) of aspercarboline C ( <b>3</b> ).....                                   | 22 |
| <b>Figure S20.</b> DEPT 135 spectrum (100 MHz, DMSO- <i>d</i> <sub>6</sub> ) of aspercarboline C ( <b>3</b> ) .....                                             | 23 |
| <b>Figure S21.</b> HSQC spectrum of aspercarboline C ( <b>3</b> ).....                                                                                          | 24 |
| <b>Figure S22.</b> <sup>1</sup> H- <sup>1</sup> H COSY spectrum of aspercarboline C ( <b>3</b> ).....                                                           | 25 |
| <b>Figure S23.</b> HMBC spectrum of aspercarboline C ( <b>3</b> ).....                                                                                          | 26 |
| <b>Figure S24.</b> HR-ESI-MS spectrum of asperdione A ( <b>13</b> ) .....                                                                                       | 27 |
| <b>Figure S25.</b> <sup>1</sup> H NMR spectrum (600 MHz, CDCl <sub>3</sub> ) of asperdione A ( <b>13</b> ).....                                                 | 28 |
| <b>Figure S26.</b> <sup>13</sup> C NMR spectrum (150 MHz, CDCl <sub>3</sub> ) of asperdione A ( <b>13</b> ) .....                                               | 29 |
| <b>Figure S27.</b> DEPT 135 spectrum (150 MHz, CDCl <sub>3</sub> ) of asperdione A ( <b>13</b> ) .....                                                          | 30 |
| <b>Figure S28.</b> DEPT 90 spectrum (150 MHz, CDCl <sub>3</sub> ) of asperdione A ( <b>13</b> ).....                                                            | 31 |
| <b>Figure S29.</b> HSQC spectrum of asperdione A ( <b>13</b> ) .....                                                                                            | 32 |
| <b>Figure S30.</b> <sup>1</sup> H- <sup>1</sup> H COSY spectrum of asperdione A ( <b>13</b> ) .....                                                             | 33 |
| <b>Figure S31.</b> HMBC spectrum of asperdione A ( <b>13</b> ) .....                                                                                            | 34 |
| <b>Figure S32.</b> <sup>1</sup> H NMR spectrum (400 MHz, acetone- <i>d</i> <sub>6</sub> ) of 1-(1-oxo-3,4,5-trihydroxy-1-pentyl)-β-carboline ( <b>4</b> ) ..... | 35 |

|                                                                                                                                                                                     |    |
|-------------------------------------------------------------------------------------------------------------------------------------------------------------------------------------|----|
| <b>Figure S33.</b> <sup>13</sup> C NMR spectrum (100 MHz, acetone- <i>d</i> <sub>6</sub> ) of 1-(1-oxo-3,4,5-trihydroxy-1-pentyl)-β-carboline ( <b>4</b> ) .....                    | 36 |
| <b>Figure S34.</b> HR-ESI-MS spectrum of 4-(9 <i>H</i> -β-Carbolin-1-yl)-4-oxobut-2-enoic acid methyl ester ( <b>5</b> ) .....                                                      | 37 |
| <b>Figure S35.</b> <sup>1</sup> H NMR spectrum (400 MHz, acetone- <i>d</i> <sub>6</sub> ) of 4-(9 <i>H</i> -β-Carbolin-1-yl)-4-oxobut-2-enoic acid methyl ester ( <b>5</b> ) .....  | 38 |
| <b>Figure S36.</b> <sup>13</sup> C NMR spectrum (100 MHz, acetone- <i>d</i> <sub>6</sub> ) of 4-(9 <i>H</i> -β-Carbolin-1-yl)-4-oxobut-2-enoic acid methyl ester ( <b>5</b> ) ..... | 39 |
| <b>Figure S37.</b> <sup>1</sup> H NMR spectrum (400 MHz, acetone- <i>d</i> <sub>6</sub> ) of perlolyrin ( <b>6</b> ) .....                                                          | 40 |
| <b>Figure S38.</b> <sup>13</sup> C NMR spectrum (100 MHz, acetone- <i>d</i> <sub>6</sub> ) of perlolyrin ( <b>6</b> ) .....                                                         | 41 |
| <b>Figure S39.</b> <sup>1</sup> H NMR spectrum (400 MHz, CDCl <sub>3</sub> ) of 1-(9 <i>H</i> -β-carbolin-1-yl)-3-hydroxy-propan-1-one ( <b>7</b> ) .....                           | 42 |
| <b>Figure S40.</b> <sup>13</sup> C NMR spectrum (100 MHz, CDCl <sub>3</sub> ) of 1-(9 <i>H</i> -β-carbolin-1-yl)-3-hydroxy-propan-1-one ( <b>7</b> ) .....                          | 43 |
| <b>Figure S41.</b> <sup>1</sup> H NMR spectrum (400 MHz, acetone- <i>d</i> <sub>6</sub> ) of cordysin E ( <b>8</b> ) .....                                                          | 44 |
| <b>Figure S42.</b> <sup>13</sup> C NMR spectrum (100 MHz, acetone- <i>d</i> <sub>6</sub> ) of cordysin E ( <b>8</b> ) .....                                                         | 45 |
| <b>Figure S43.</b> <sup>1</sup> H NMR spectrum (400 MHz, CDCl <sub>3</sub> ) of 1-methoxycarbonyl-β-carboline ( <b>9</b> ) .....                                                    | 46 |
| <b>Figure S44.</b> <sup>13</sup> C NMR spectrum (100 MHz, CDCl <sub>3</sub> ) of 1-methoxycarbonyl-β-carboline ( <b>9</b> ) .....                                                   | 47 |
| <b>Figure S45.</b> <sup>1</sup> H NMR spectrum (400 MHz, CDCl <sub>3</sub> ) of 1-acetyl-β-carboline ( <b>10</b> ) .....                                                            | 48 |
| <b>Figure S46.</b> <sup>13</sup> C NMR spectrum (100 MHz, CDCl <sub>3</sub> ) of 1-acetyl-β-carboline ( <b>10</b> ) .....                                                           | 49 |
| <b>Figure S47.</b> <sup>1</sup> H NMR spectrum (400 MHz, CDCl <sub>3</sub> ) of cordysin C ( <b>11</b> ) .....                                                                      | 50 |
| <b>Figure S48.</b> <sup>13</sup> C NMR spectrum (100 MHz, CDCl <sub>3</sub> ) of cordysin C ( <b>11</b> ) .....                                                                     | 51 |
| <b>Figure S49.</b> <sup>1</sup> H NMR spectrum (400 MHz, acetone- <i>d</i> <sub>6</sub> ) of 3-hydroxy-β-carboline ( <b>12</b> ) .....                                              | 52 |
| <b>Figure S50.</b> <sup>13</sup> C NMR spectrum (100 MHz, acetone- <i>d</i> <sub>6</sub> ) of 3-hydroxy-β-carboline ( <b>12</b> ) .....                                             | 53 |
| <b>Table S1.</b> Composition of each nutrient source in different culture media .....                                                                                               | 54 |
| <b>Figure S51.</b> HPLC spectra of eight extracts from eight culture media .....                                                                                                    | 55 |
| <b>Figure S52.</b> The most stable conformers of compound <b>1</b> calculated at the B3LYP/6-31+G(d) level. Relative populations are in parentheses. ....                           | 56 |
| <b>Figure S53.</b> The most stable conformers of compound <b>3</b> calculated at the B3LYP/6-31+G(d) level. Relative populations are in parentheses. ....                           | 56 |
| <b>Figure S54.</b> The most stable conformers of compound <b>13</b> calculated at the B3LYP/6-31+G(d) level. Relative populations are in parentheses. ....                          | 57 |

MS #16 RT: 0.10 AV: 1 NL: 5.66E6  
T: FTMS + cESI Full ms [100.00-1000.00]

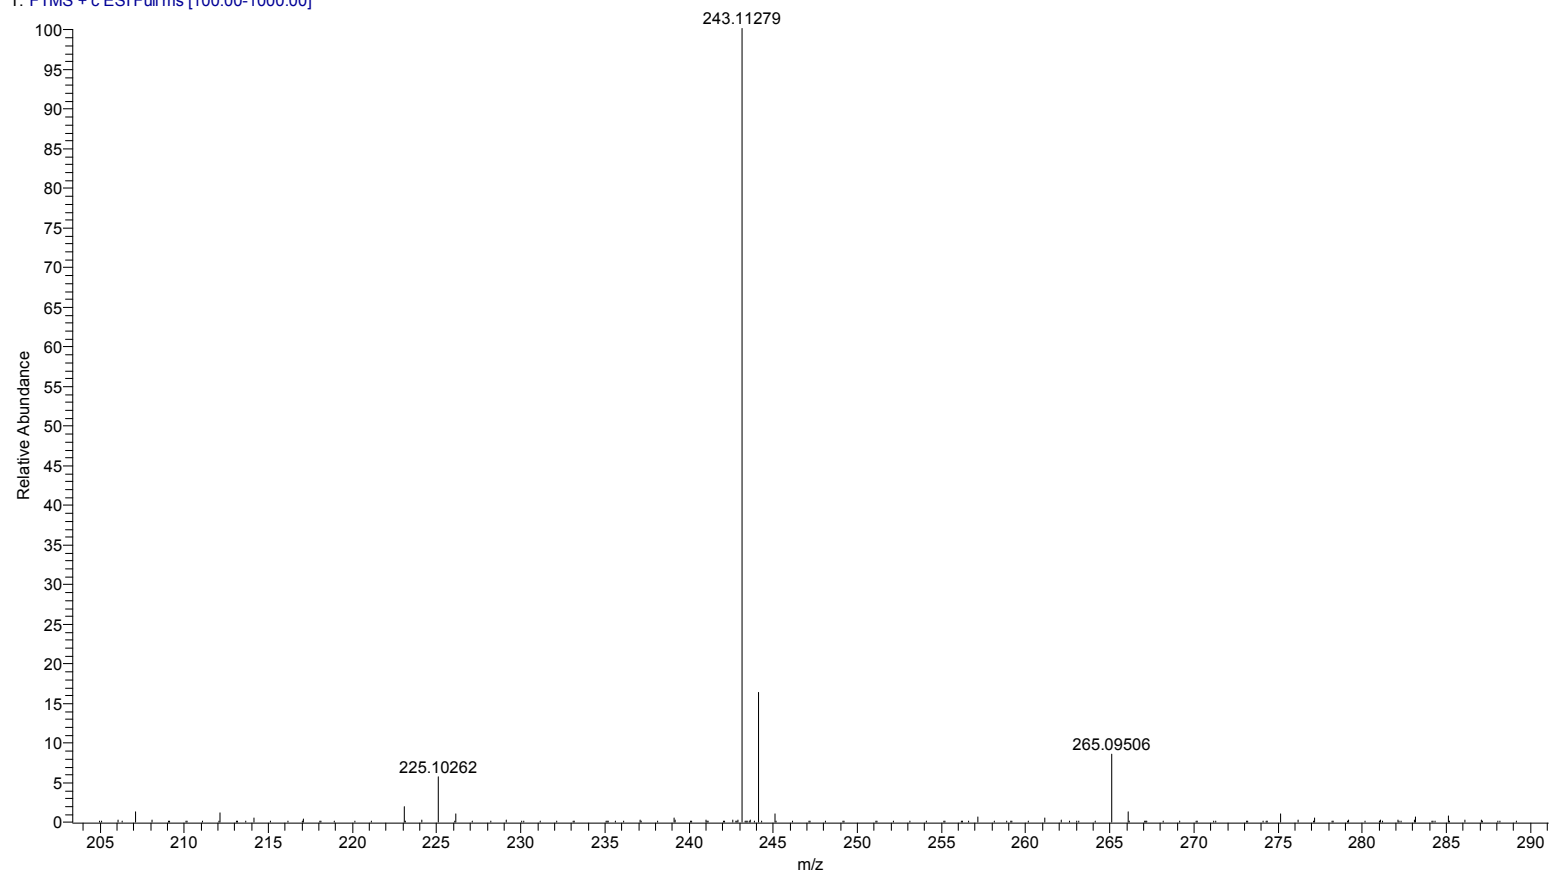

SPECTRUM - simulation :

| m/z       | Theo. Mass | Delta (ppm) | RDB equiv. | Composition   |
|-----------|------------|-------------|------------|---------------|
| 243.11279 | 243.11280  | -0.06       | 8.5        | C14 H15 N2 O2 |

**Figure S1.** HR-ESI-MS spectrum of aspercarboline A (**1**).

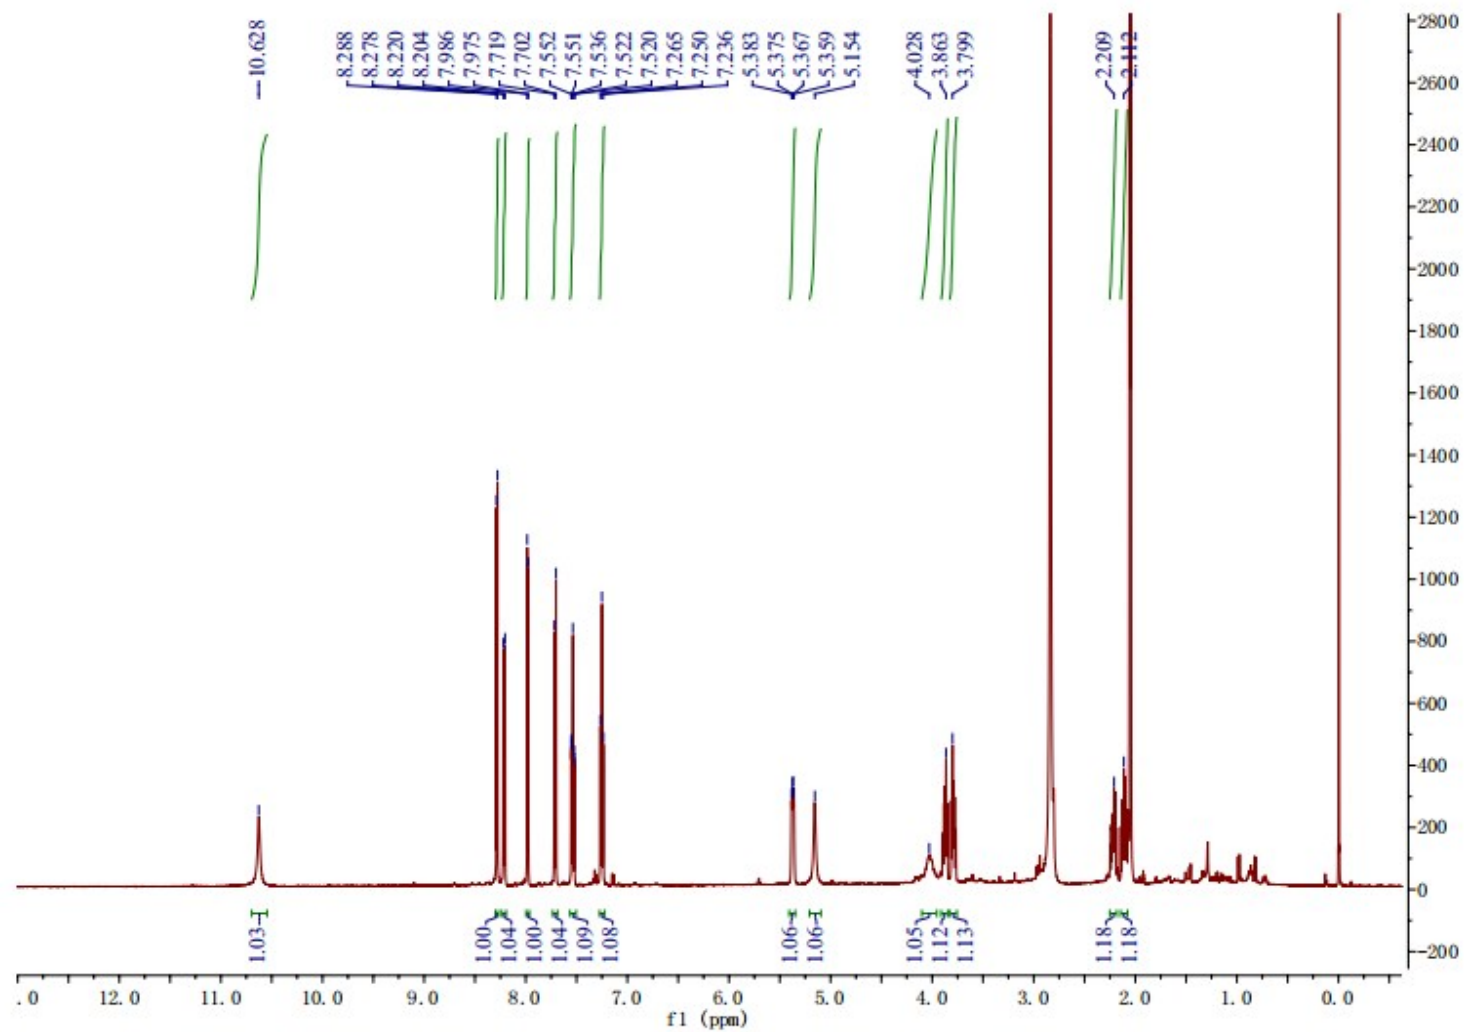

**Figure S2.**  $^1\text{H}$  NMR spectrum (500 MHz, acetone- $d_6$ ) spectrum of aspercaboline A (**1**)

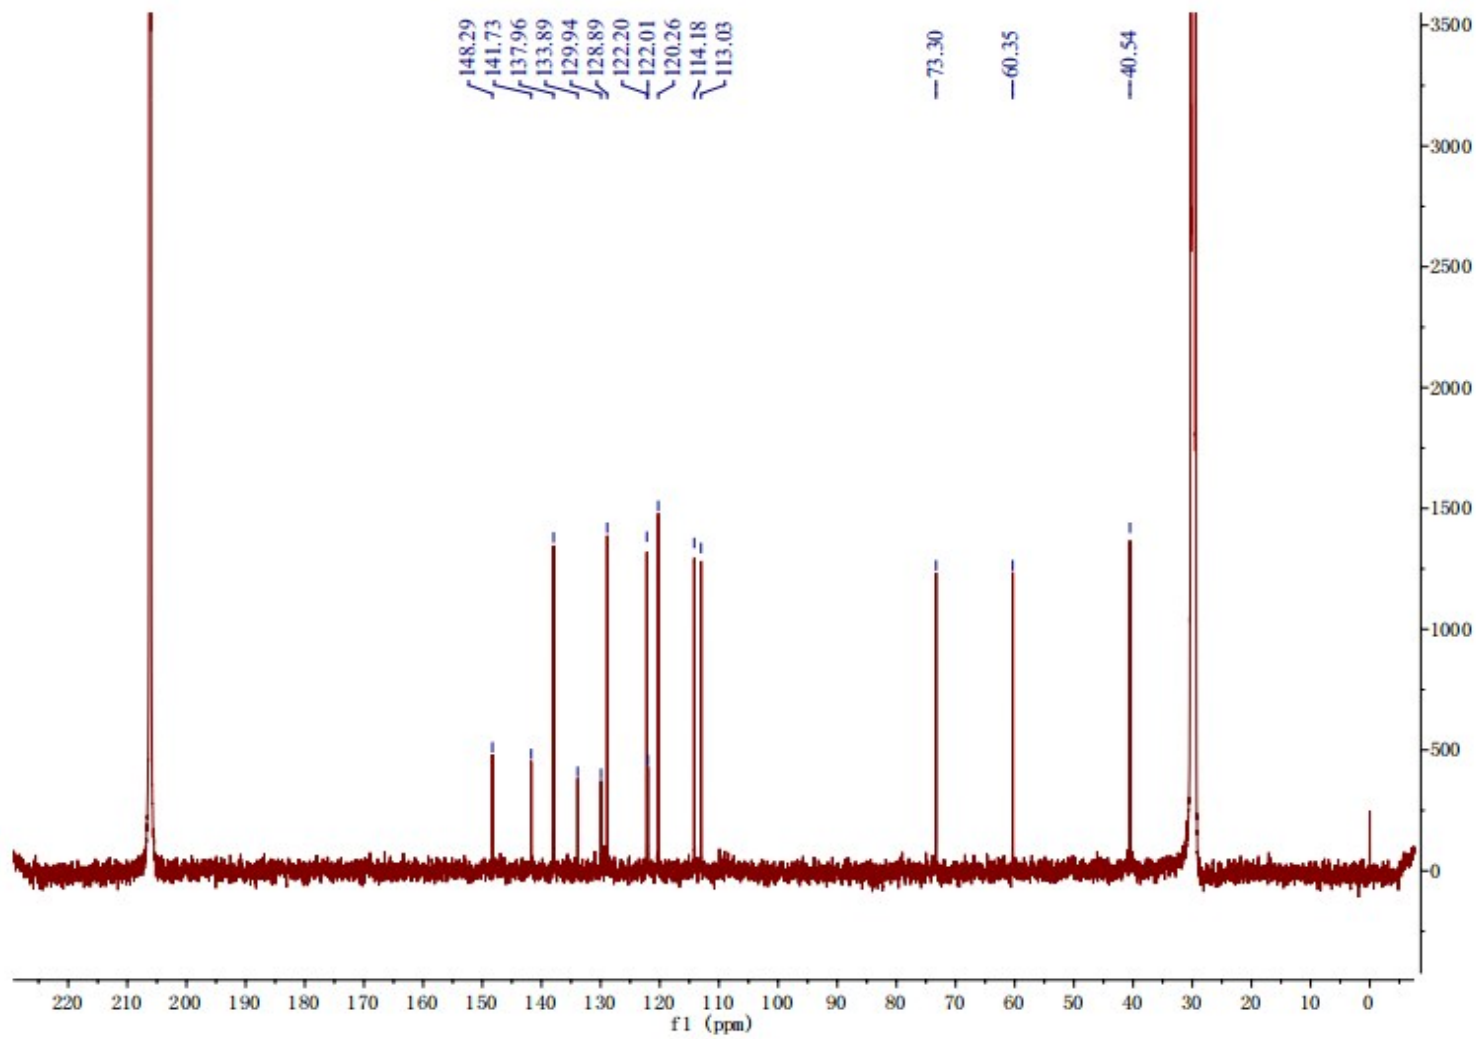

**Figure S3.**  $^{13}\text{C}$  NMR spectrum (125 MHz, acetone- $d_6$ ) of aspercarboline A (**1**)

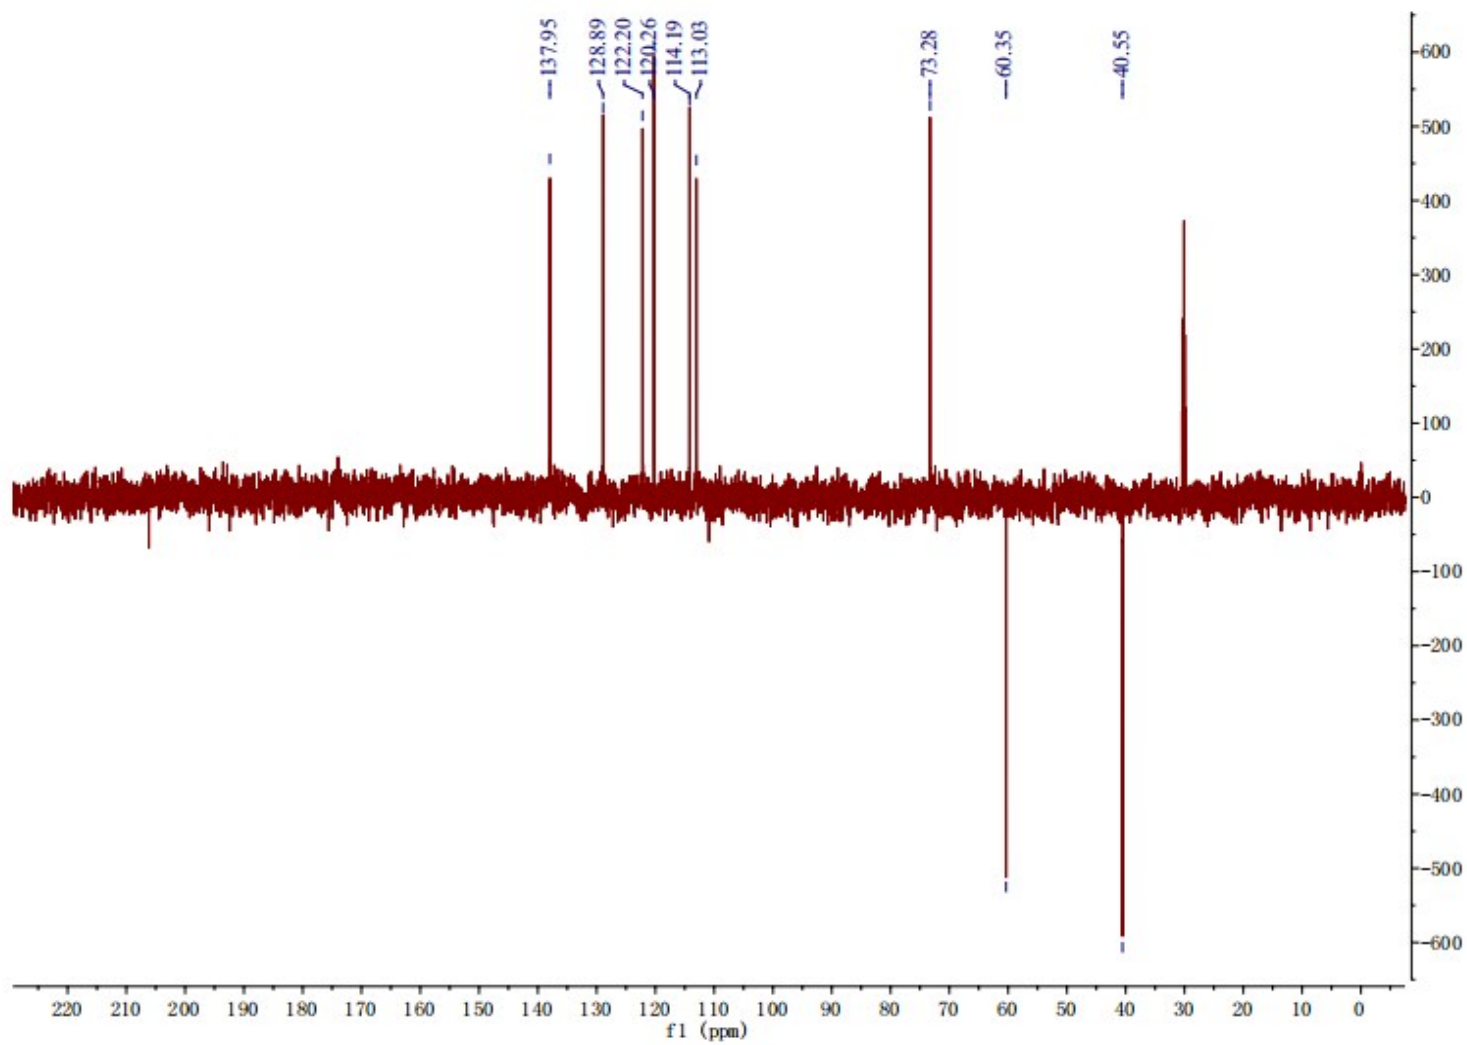

**Figure S4.** DEPT 135 spectrum (125 MHz, acetone-*d*<sub>6</sub>) of aspercarboline A (**1**)

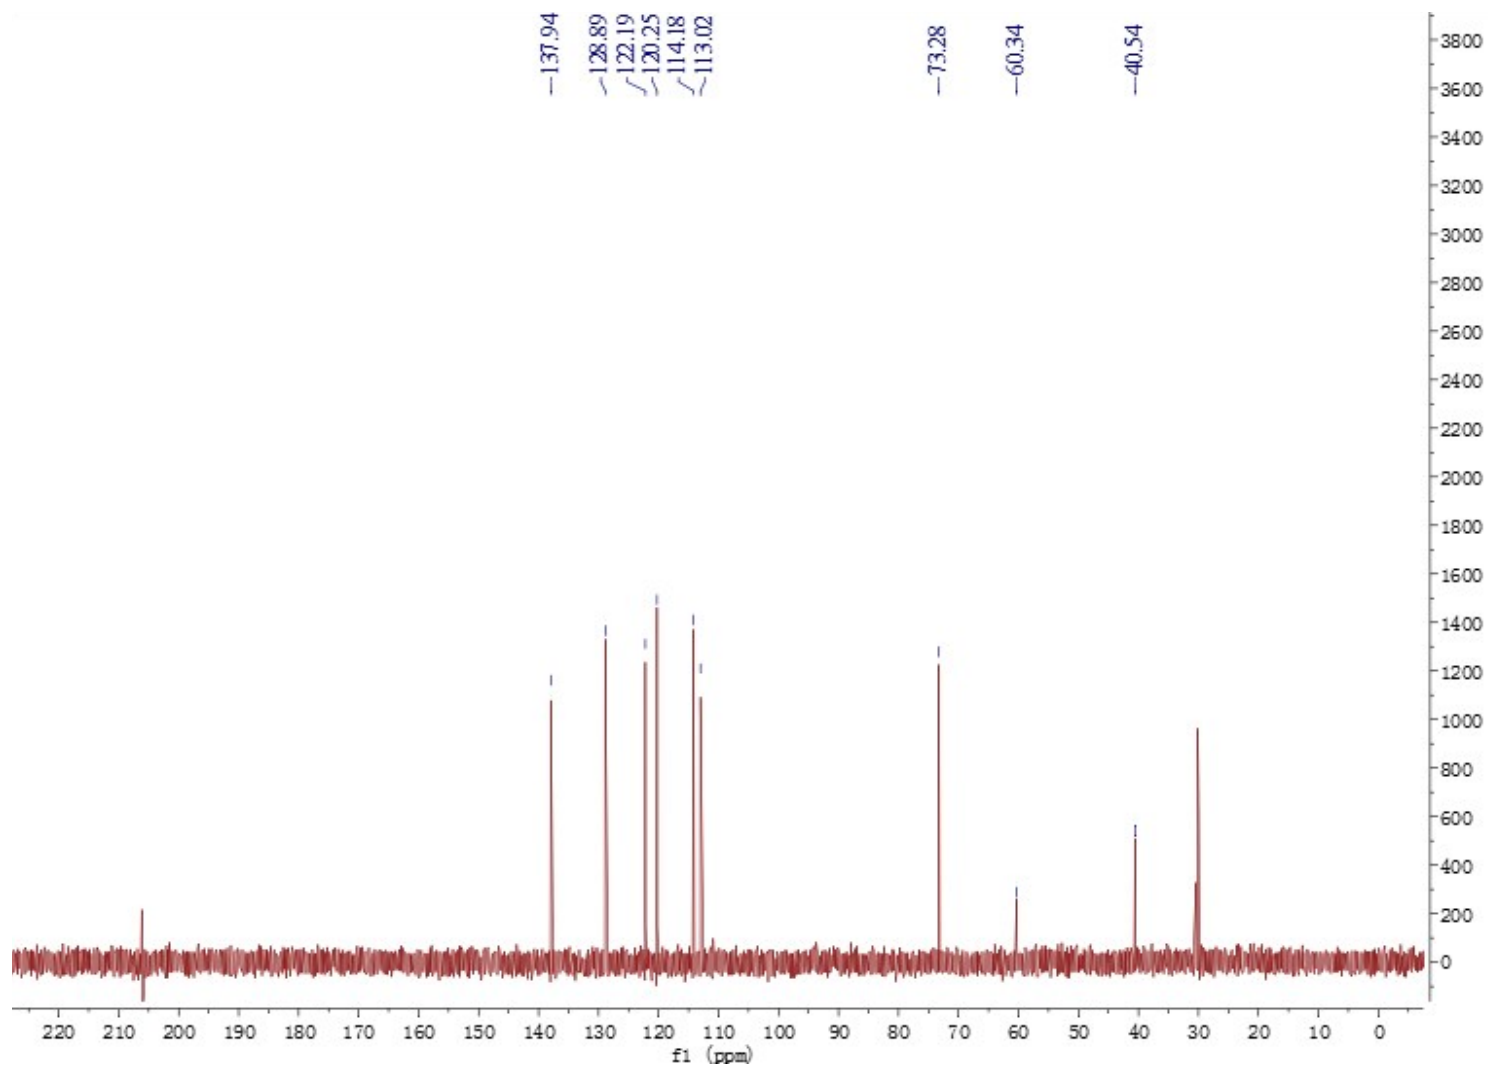

**Figure S5.** DEPT 90 spectrum (125 MHz, acetone-*d*<sub>6</sub>) of aspercarboline A (**1**)



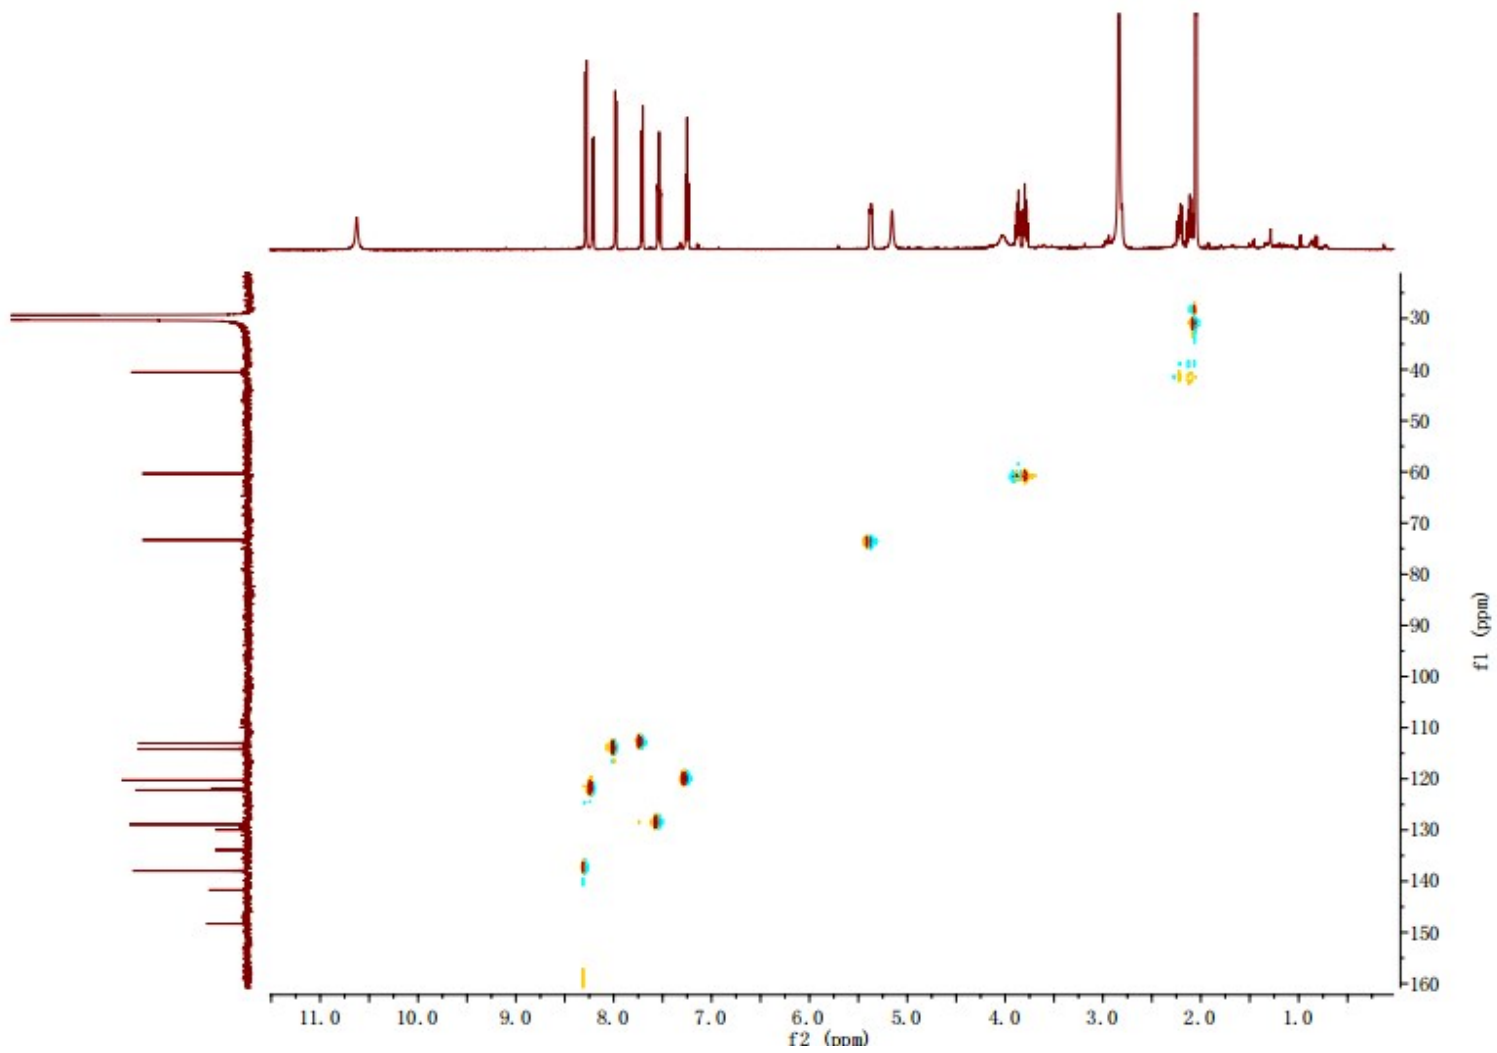

Figure S6. HSQC spectrum of aspercarboline A (1)

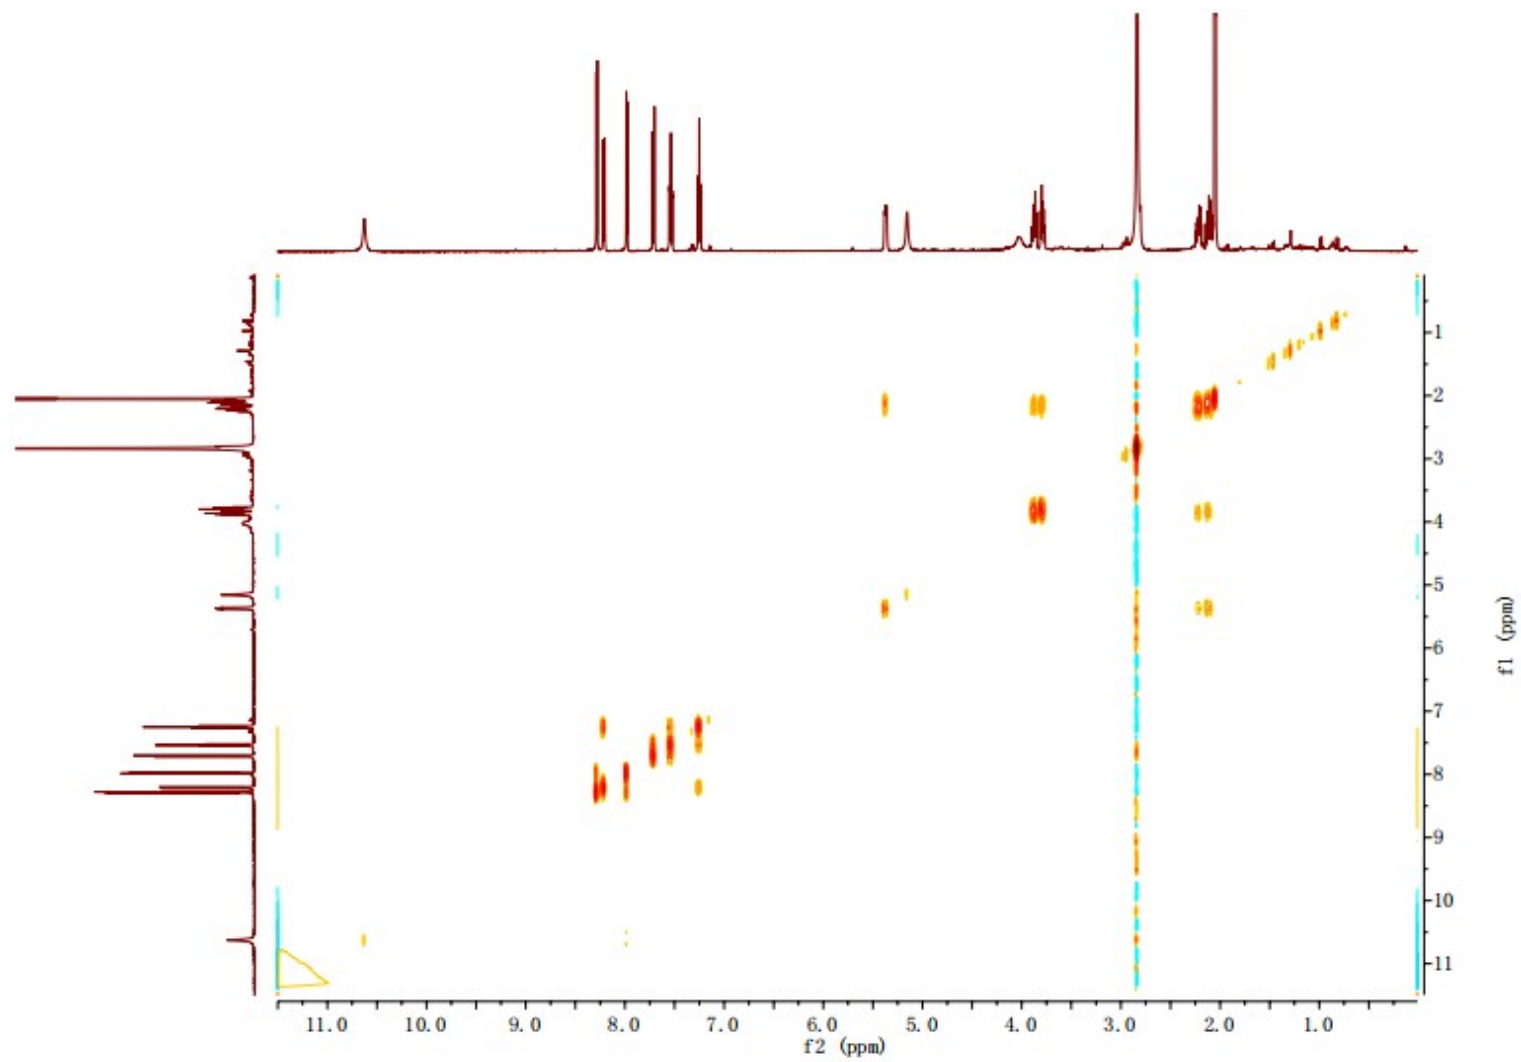

**Figure S7.**  $^1\text{H}$ - $^1\text{H}$  COSY spectrum of aspercarboline A (**1**)

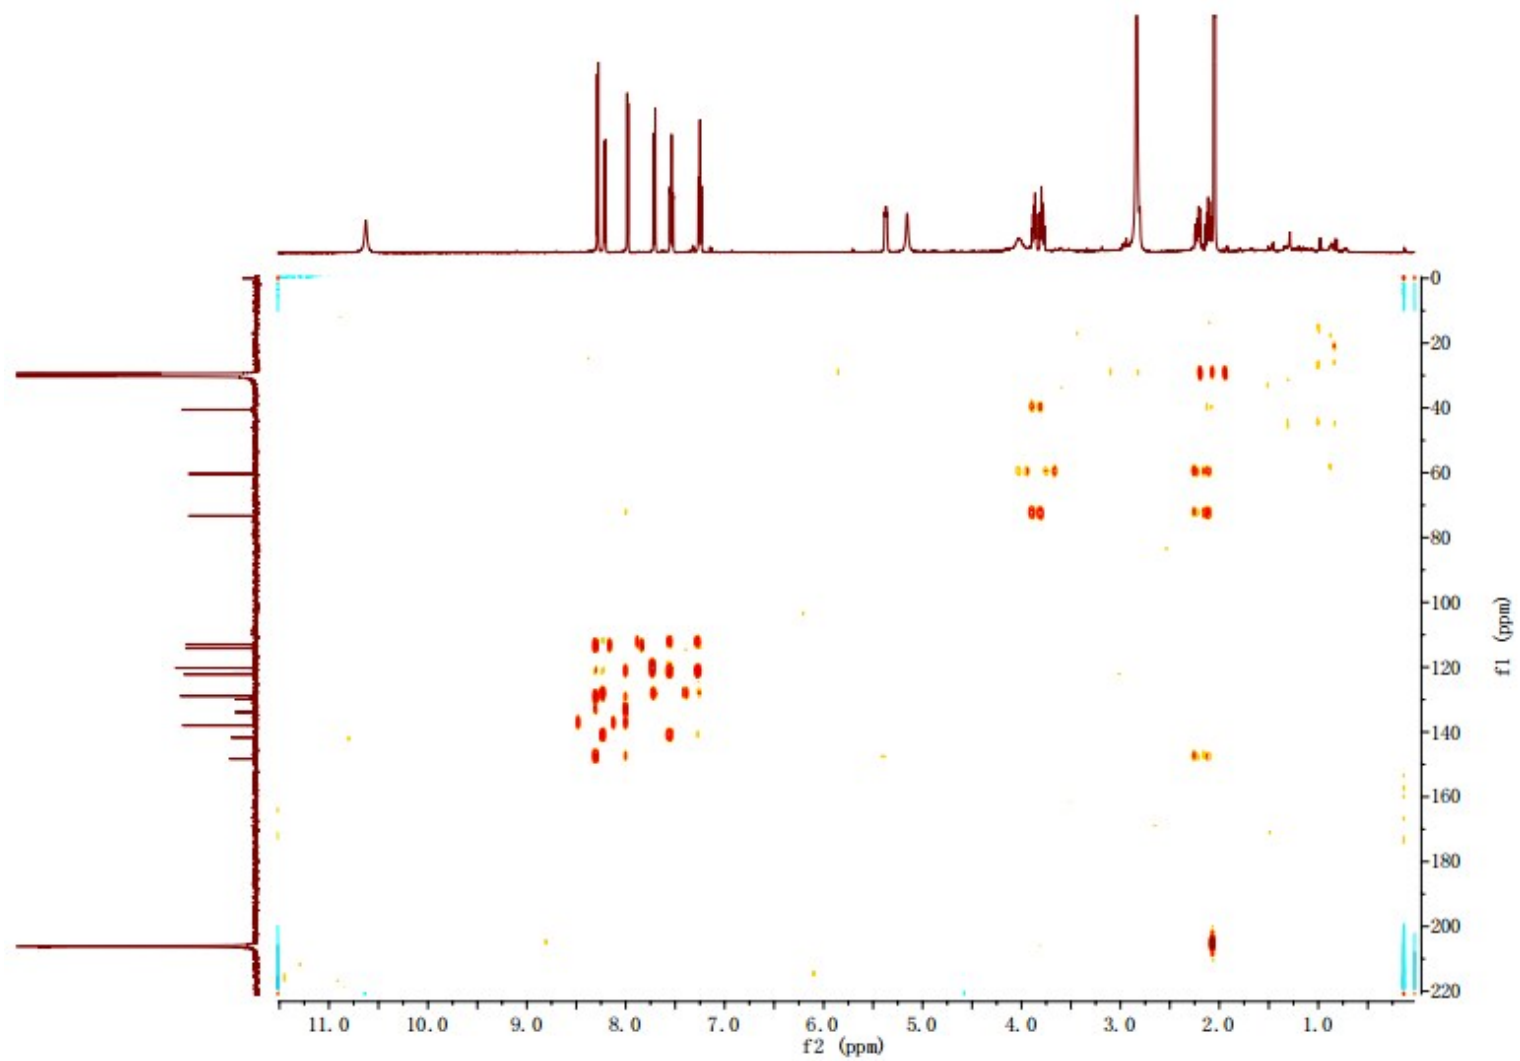

**Figure S8.** HMBC spectrum of aspercarboline A (**1**)

1810A9655-02 #17-35 RT: 0.03-0.06 AV: 19 NL: 3.65E6  
T: ITMS + c ESI Full ms [100.0000-1000.0000]

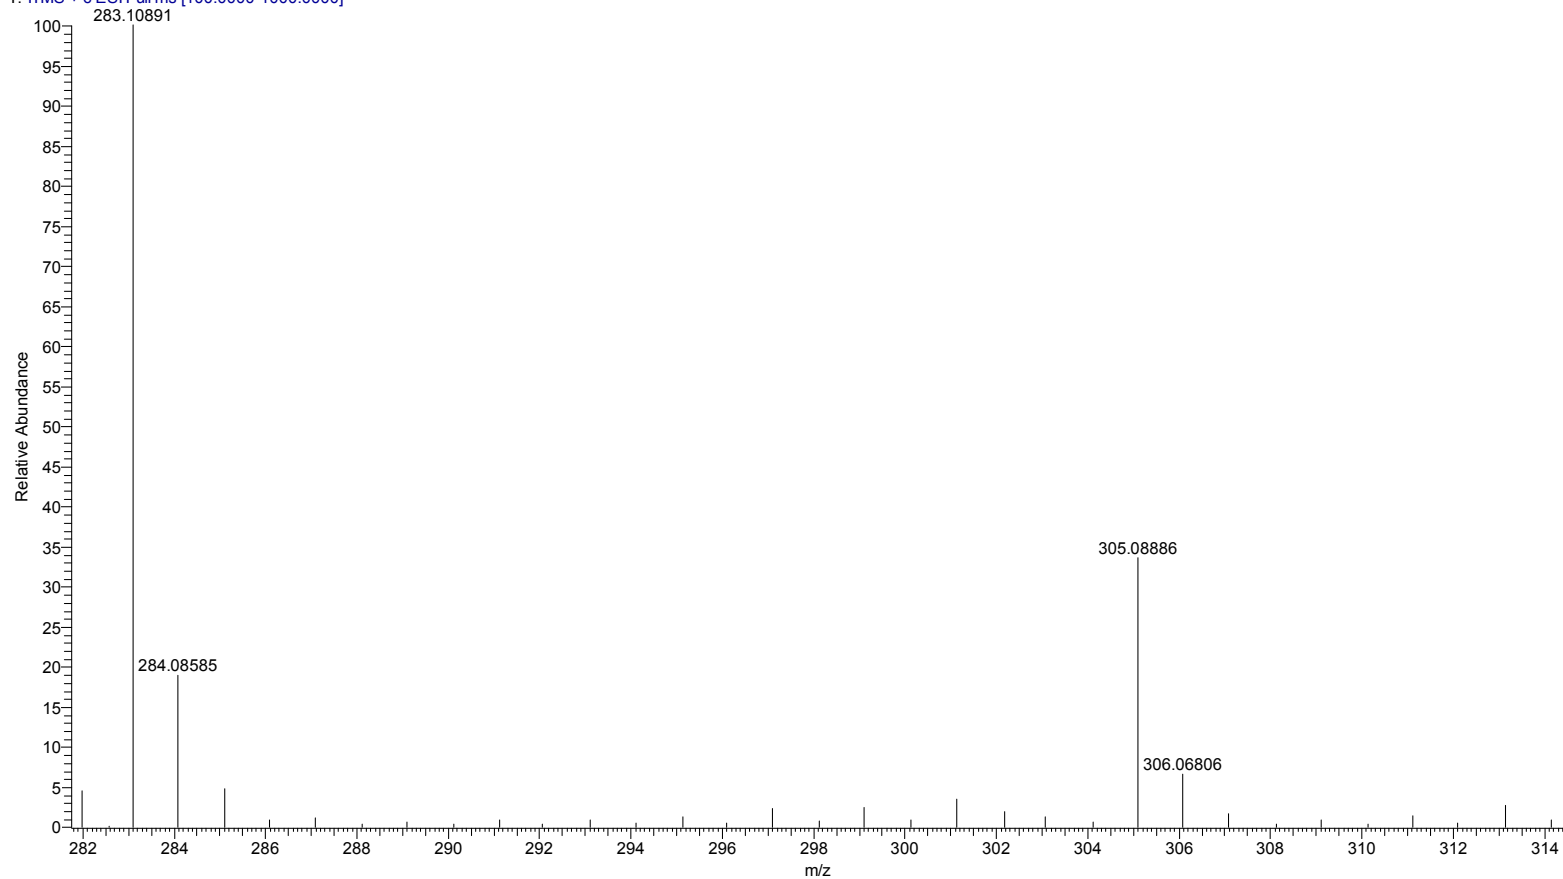

SPECTRUM - simulation :

| m/z       | Theo. Mass | Delta (ppm) | RDB equiv. | Composition                                                   |
|-----------|------------|-------------|------------|---------------------------------------------------------------|
| 283.10891 | 283.10772  | 4.21        | 10.5       | C <sub>16</sub> H <sub>15</sub> O <sub>3</sub> N <sub>2</sub> |

**Figure S9.** HR-ESI-MS spectrum of aspercarboline B (**2**).

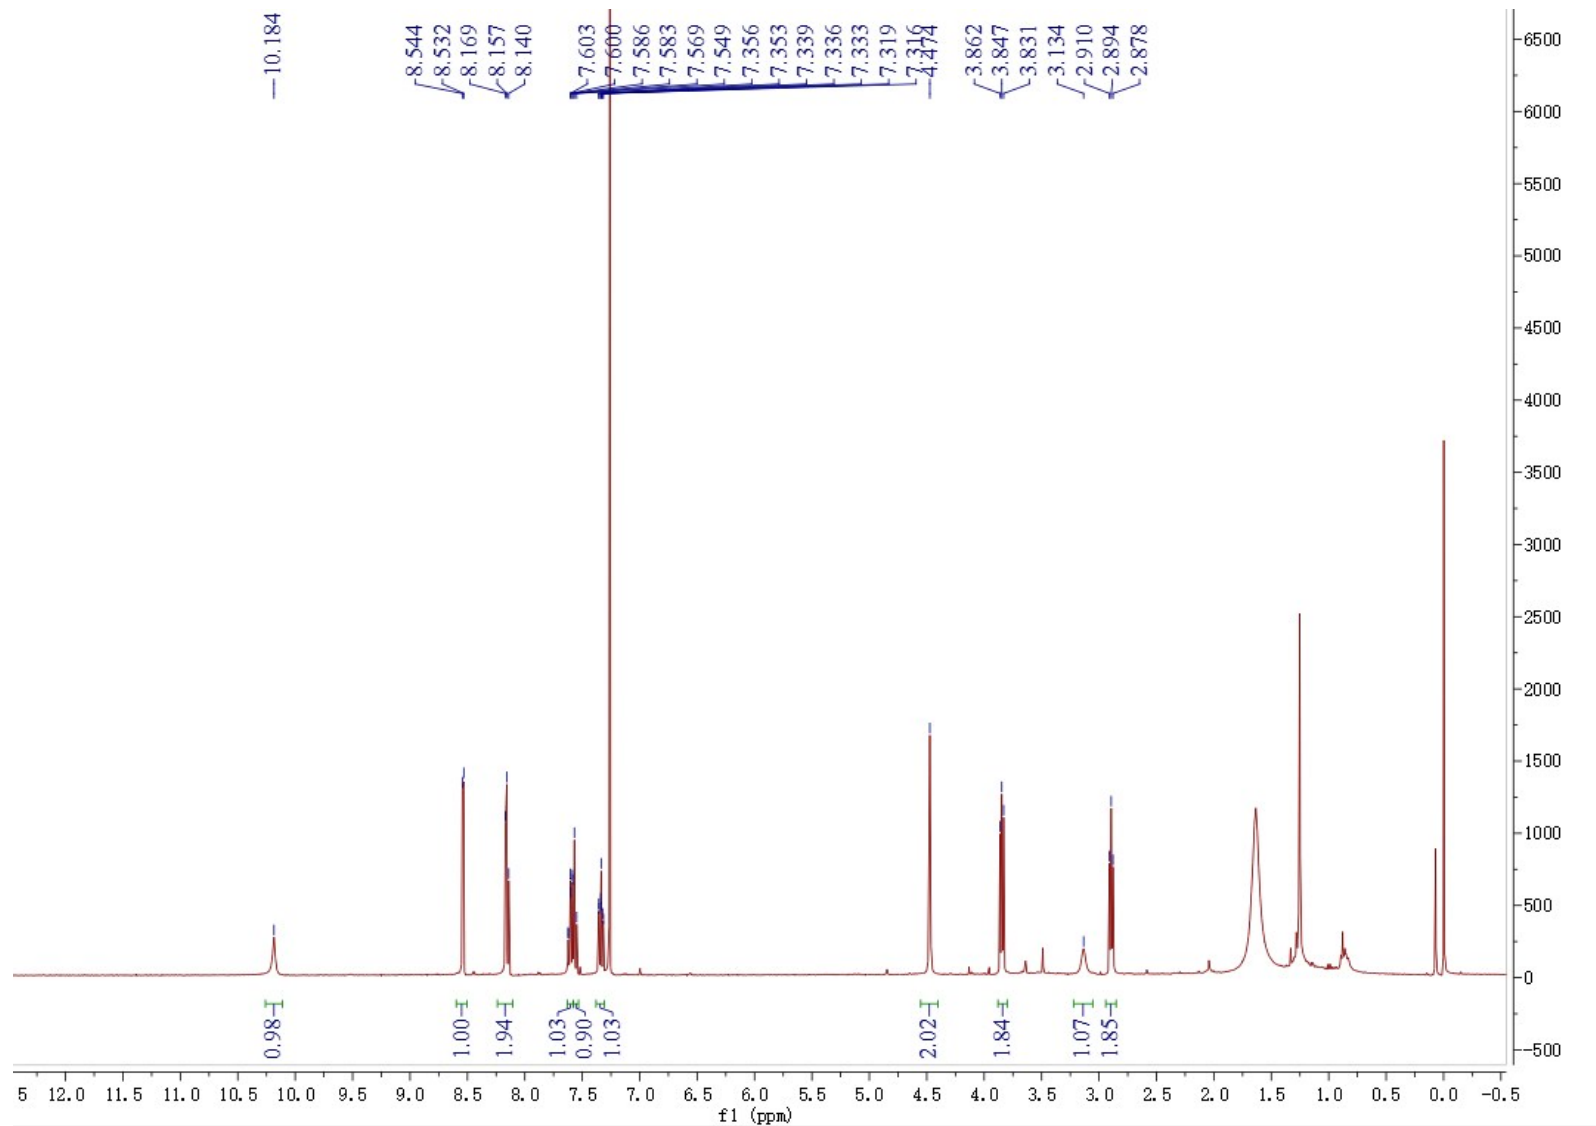

**Figure S10.** <sup>1</sup>H NMR spectrum (400 MHz, CDCl<sub>3</sub>) of aspercarboline B (**2**)

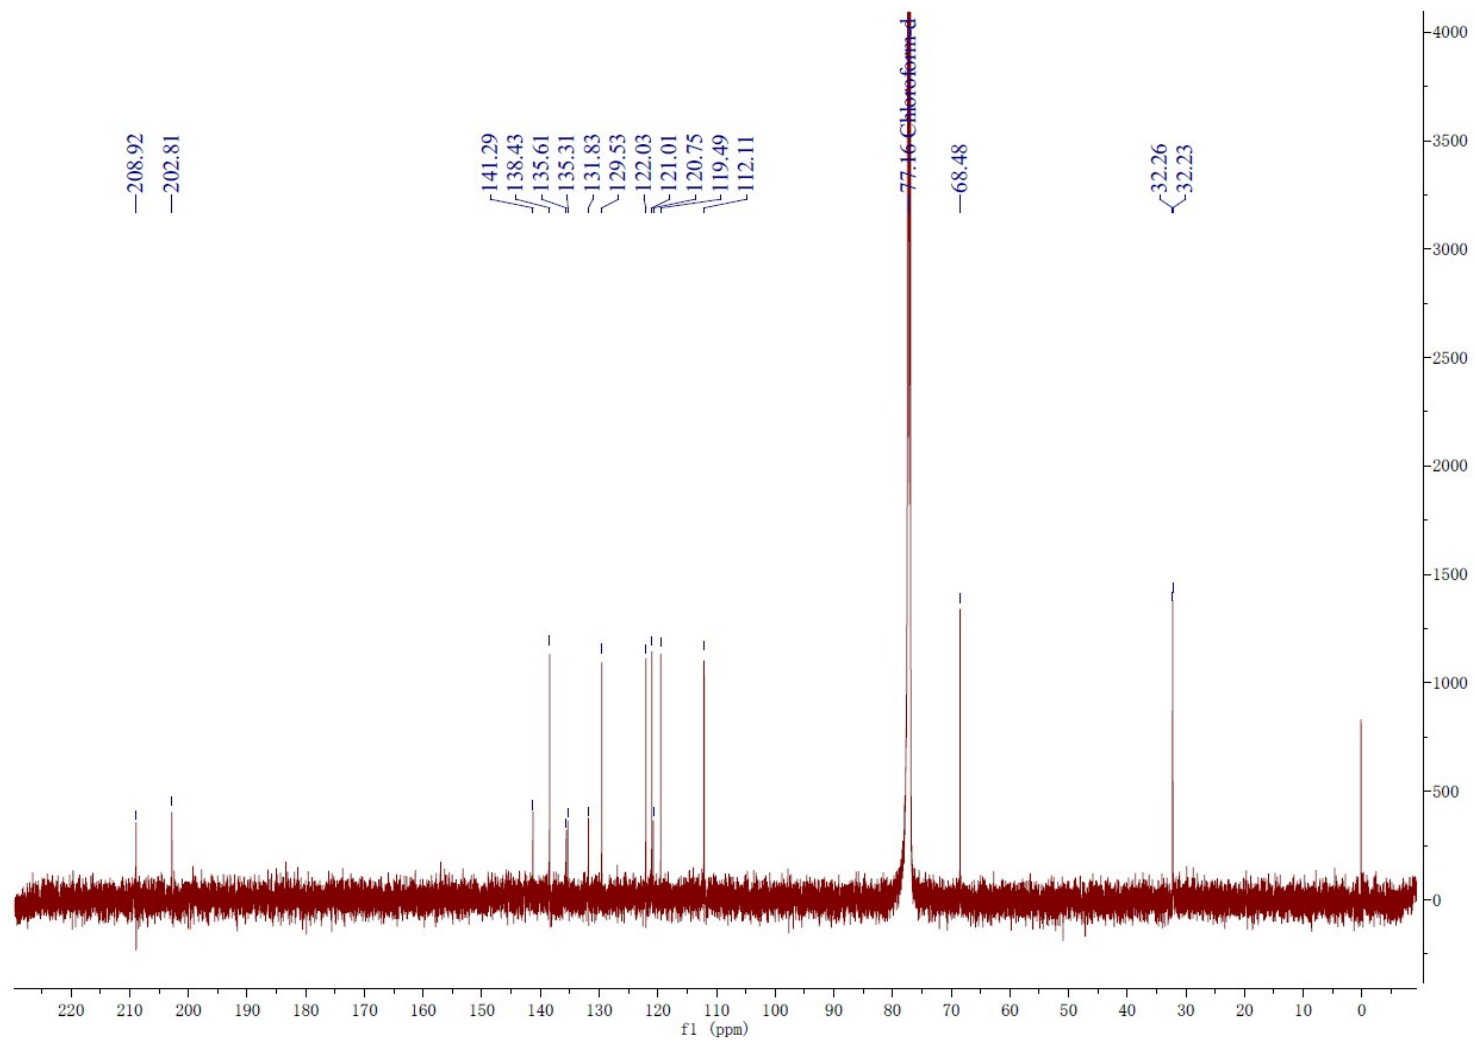

Figure S11. <sup>13</sup>C NMR spectrum (100 MHz, CDCl<sub>3</sub>) of aspercarboline B (**2**)

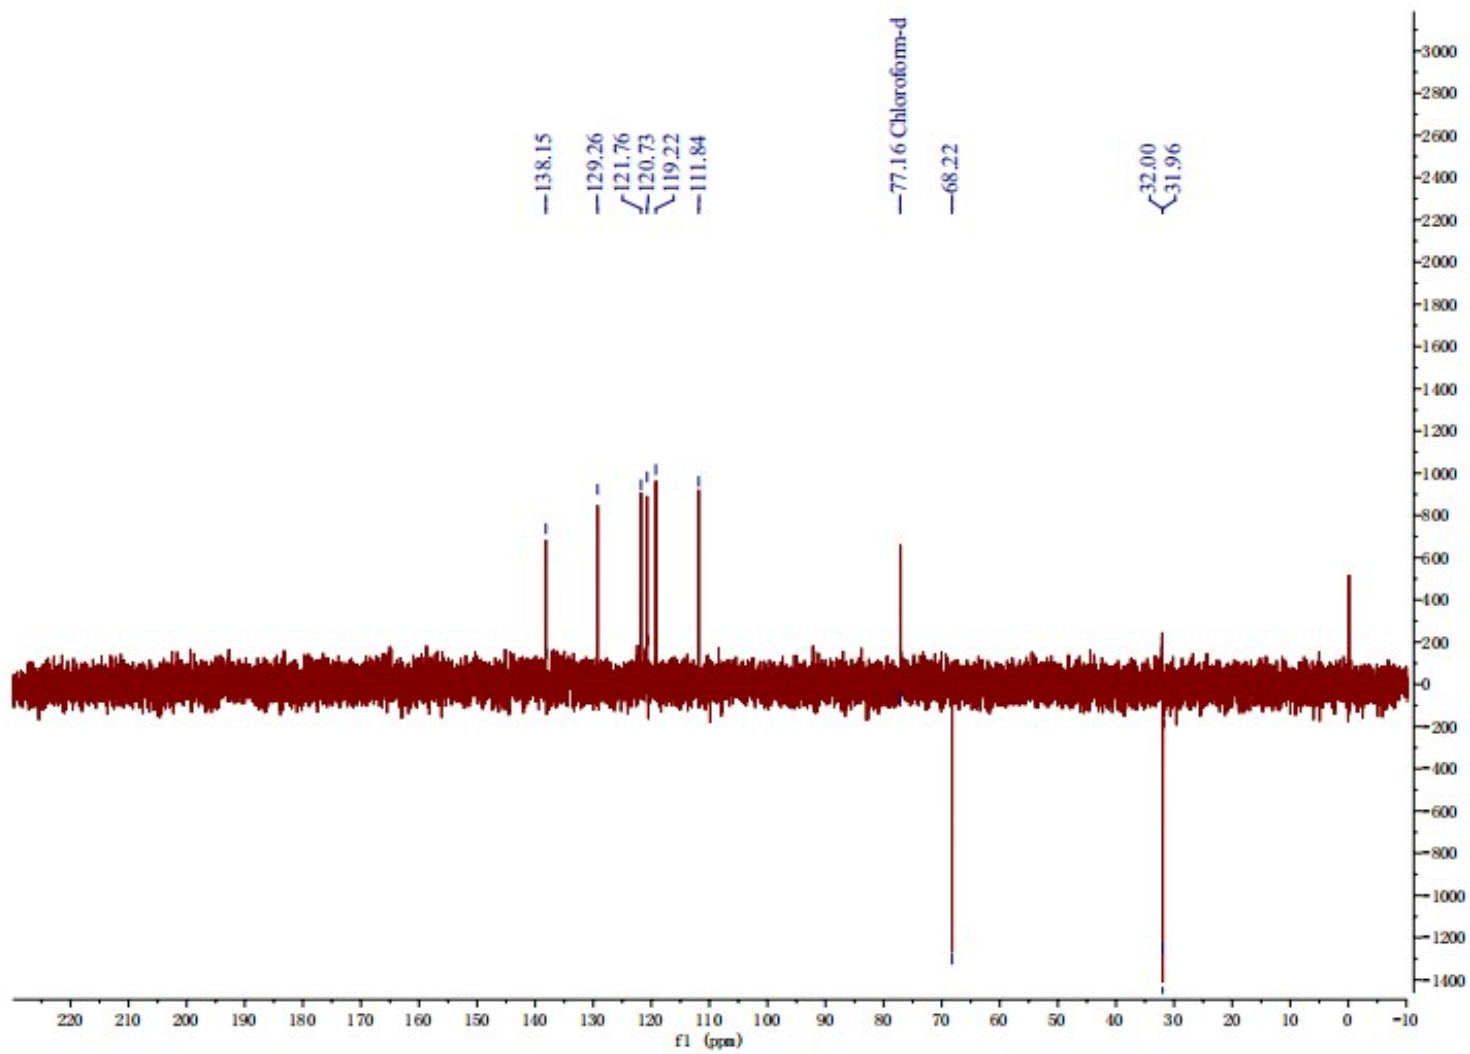

**Figure S12.** DEPT 135 spectrum (100 MHz, CDCl<sub>3</sub>) of aspercarboline B (**2**)

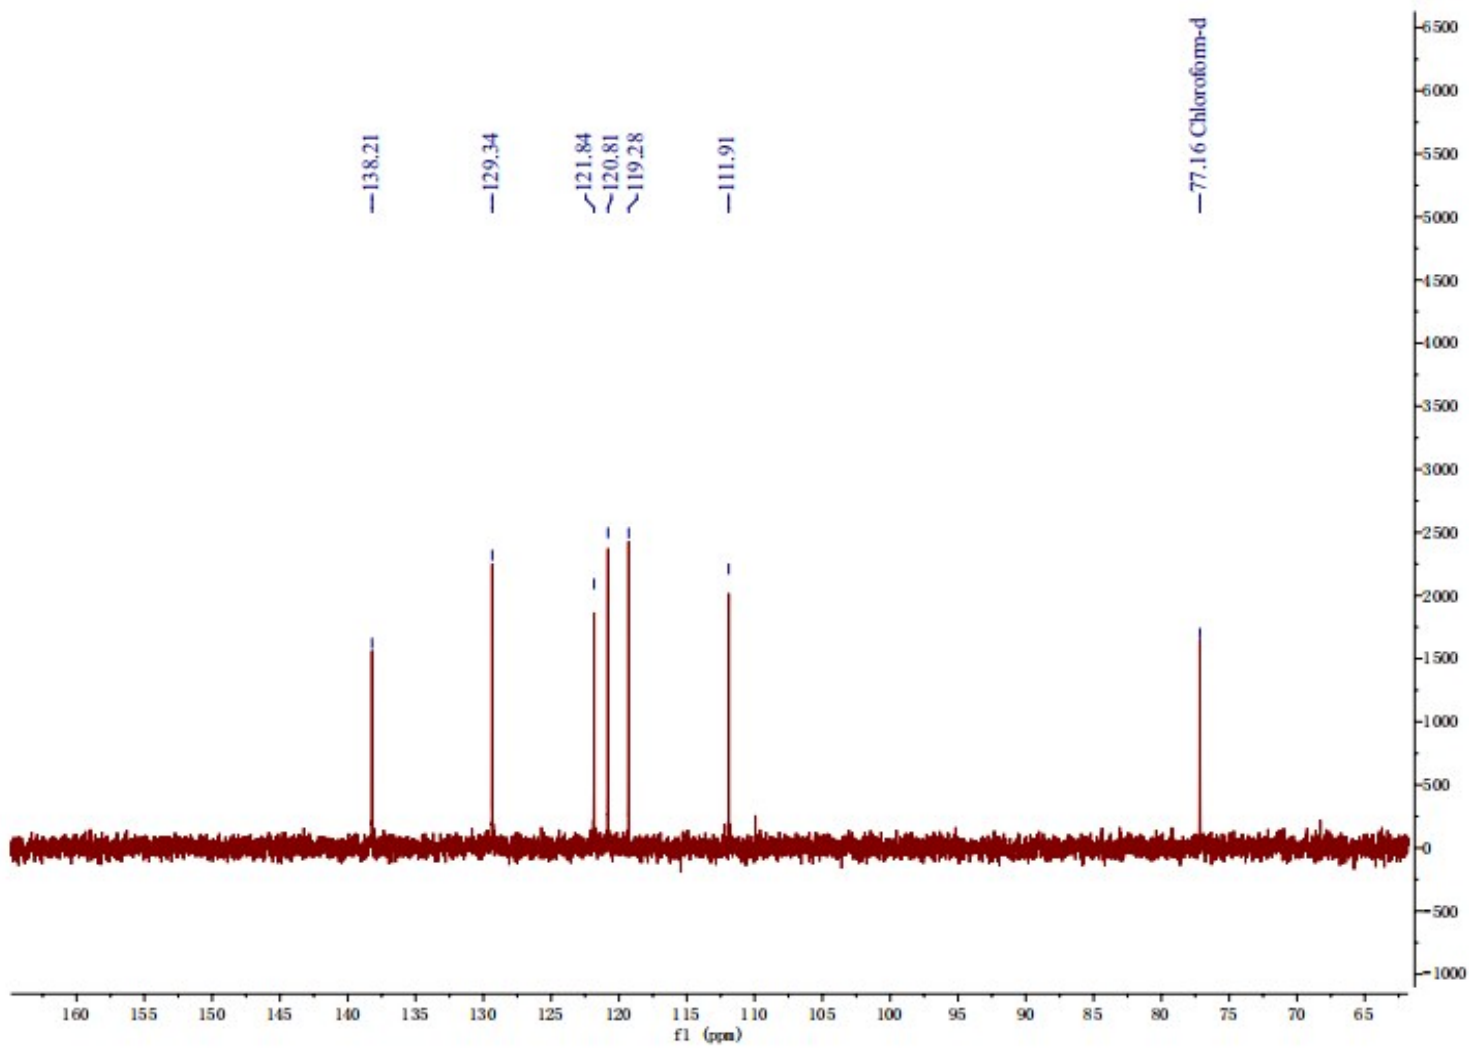

**Figure S13.** DEPT 90 spectrum (100 MHz, CDCl<sub>3</sub>) of aspercarboline B (**2**)



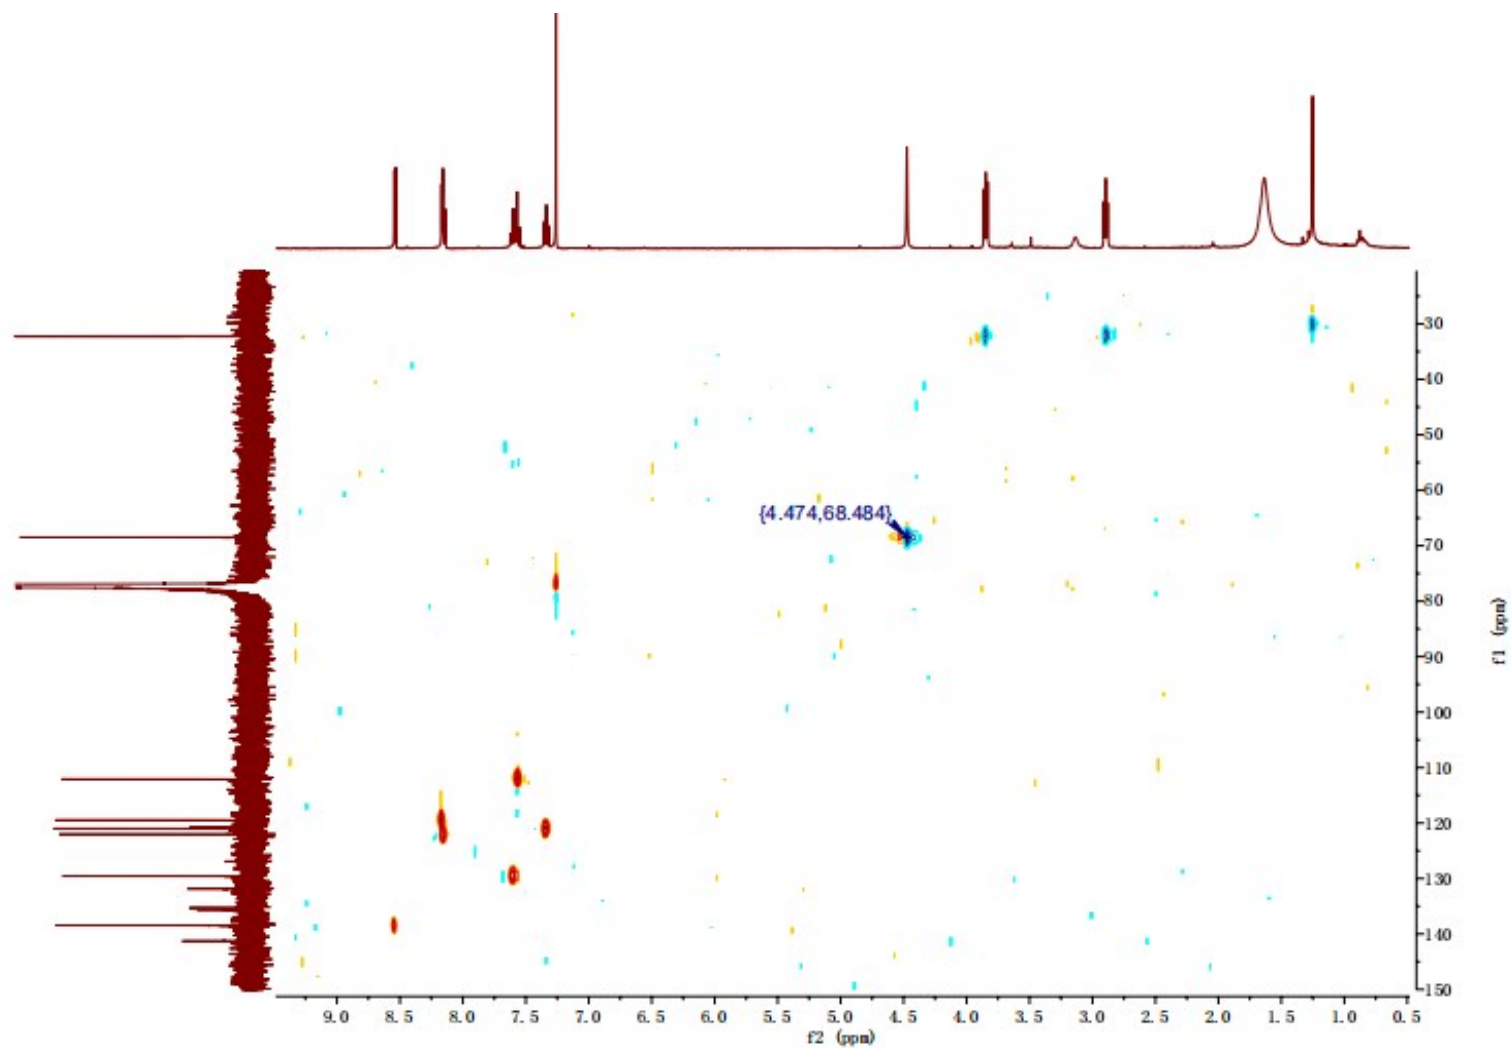

**Figure S14.** HSQC spectrum of aspercarboline B (**2**)

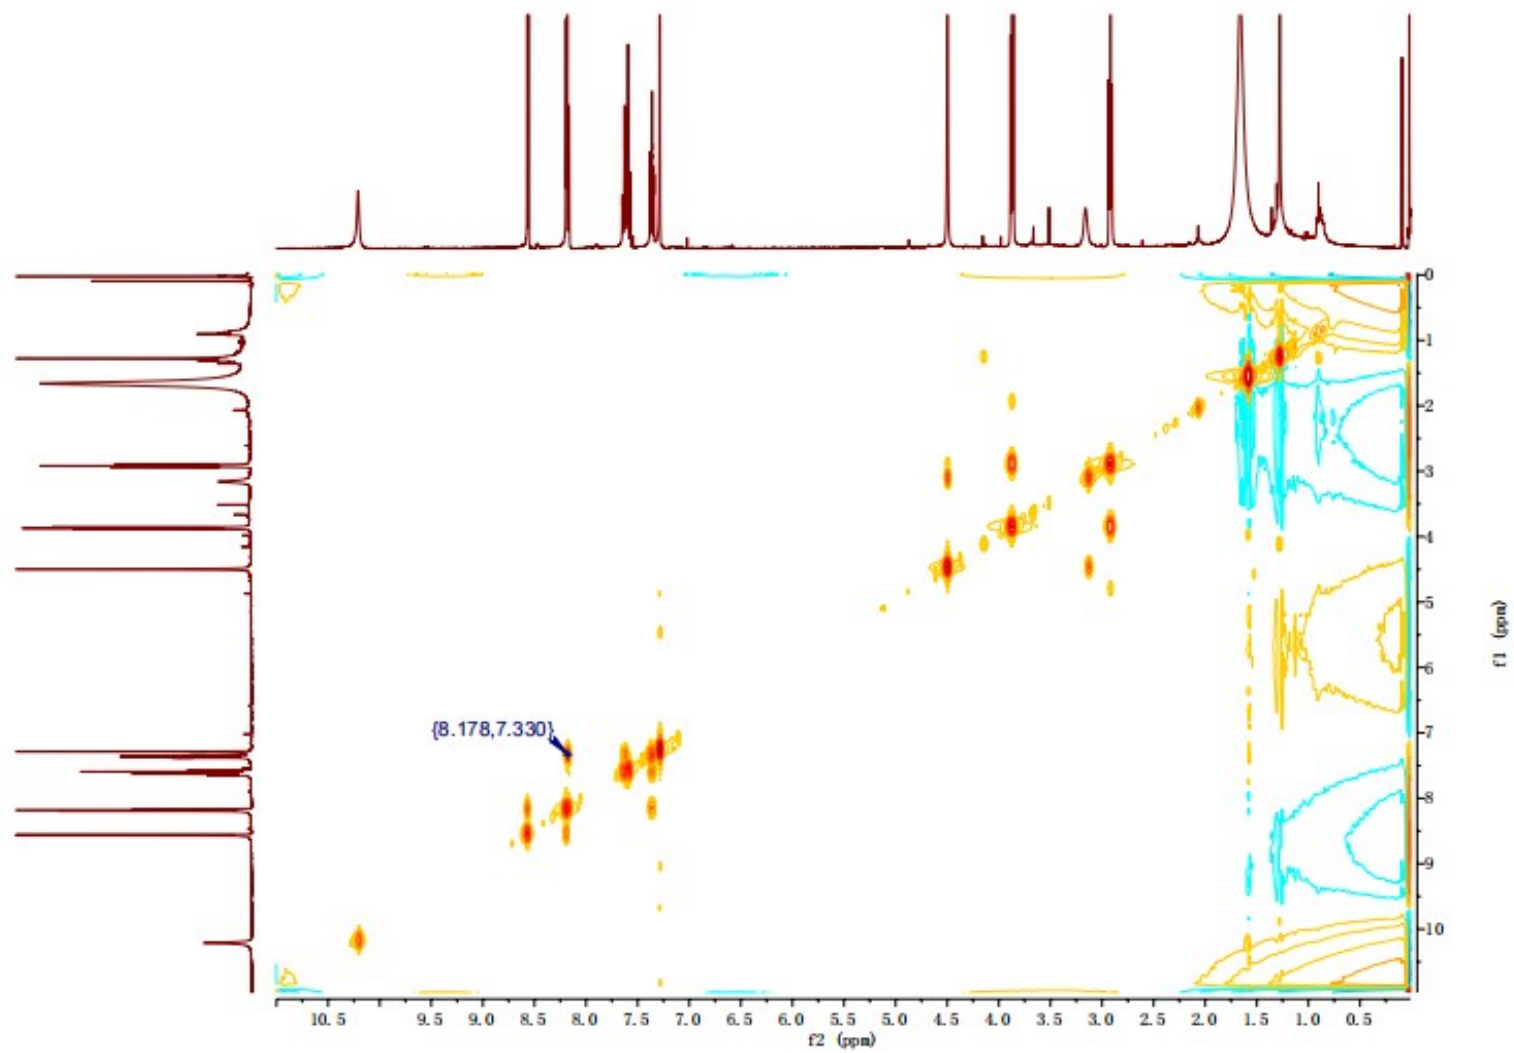

Figure S15.  $^1\text{H}$ - $^1\text{H}$  COSY spectrum of aspercarboline B (2)

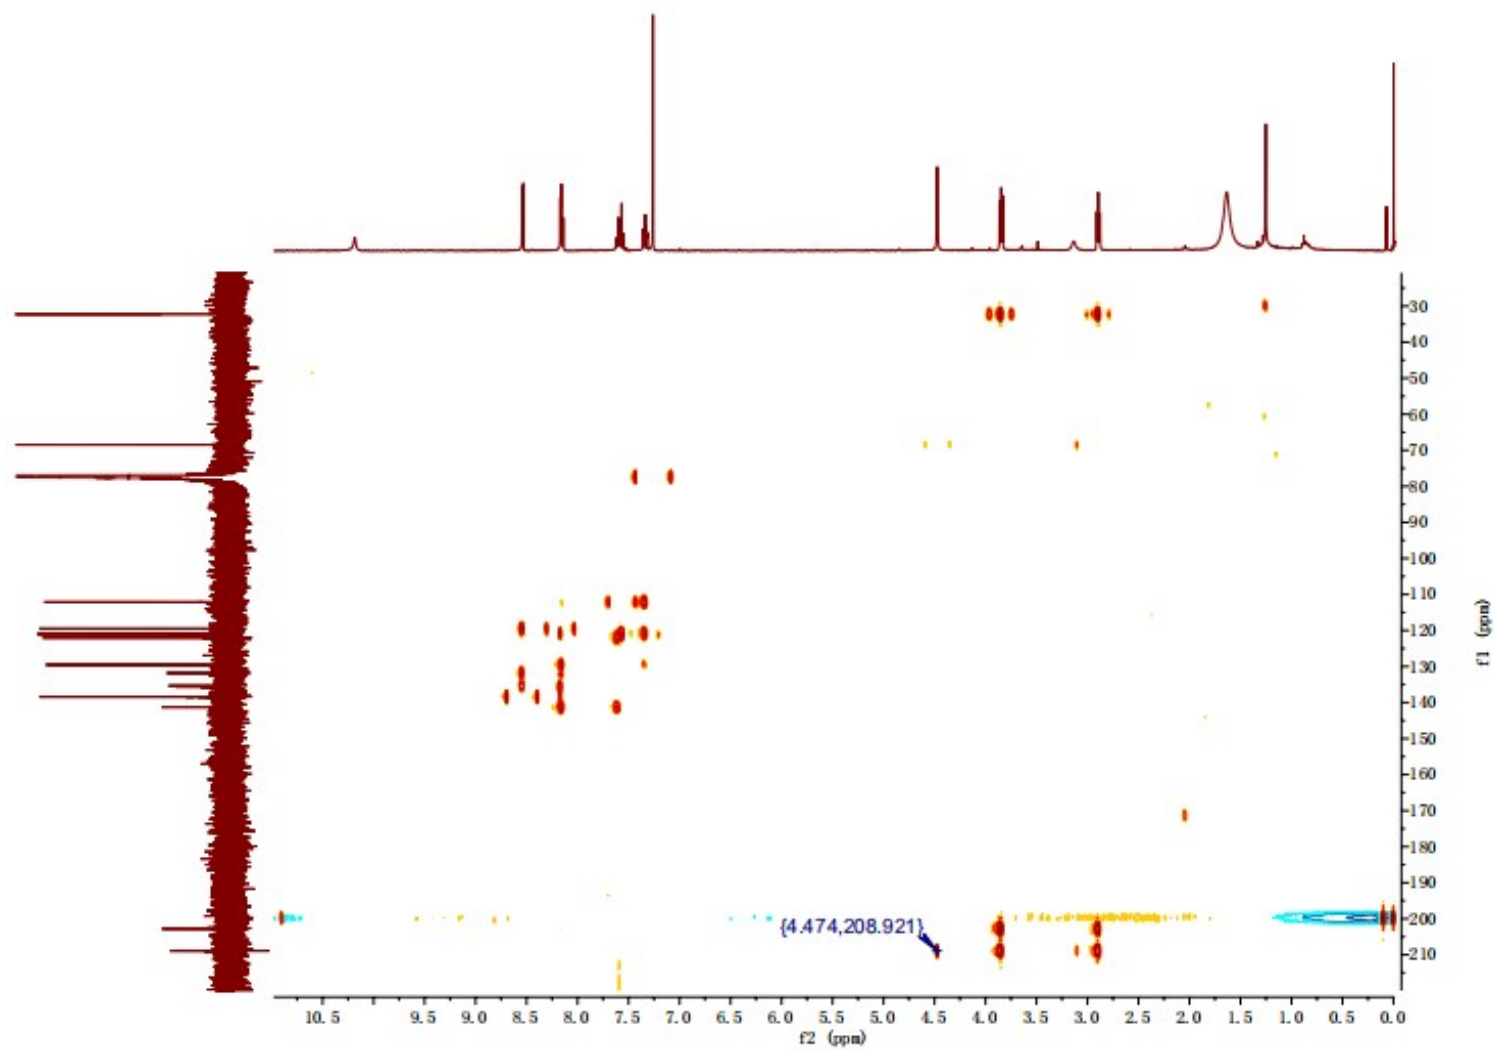

**Figure S16.** HMBC spectrum of aspercarboline B (**2**)

1806A0793-8 #33-69 RT: 0.07-0.14 AV: 37 NL: 4.51E7  
T: FTMS + c ESI Full ms [100.0000-1000.0000]

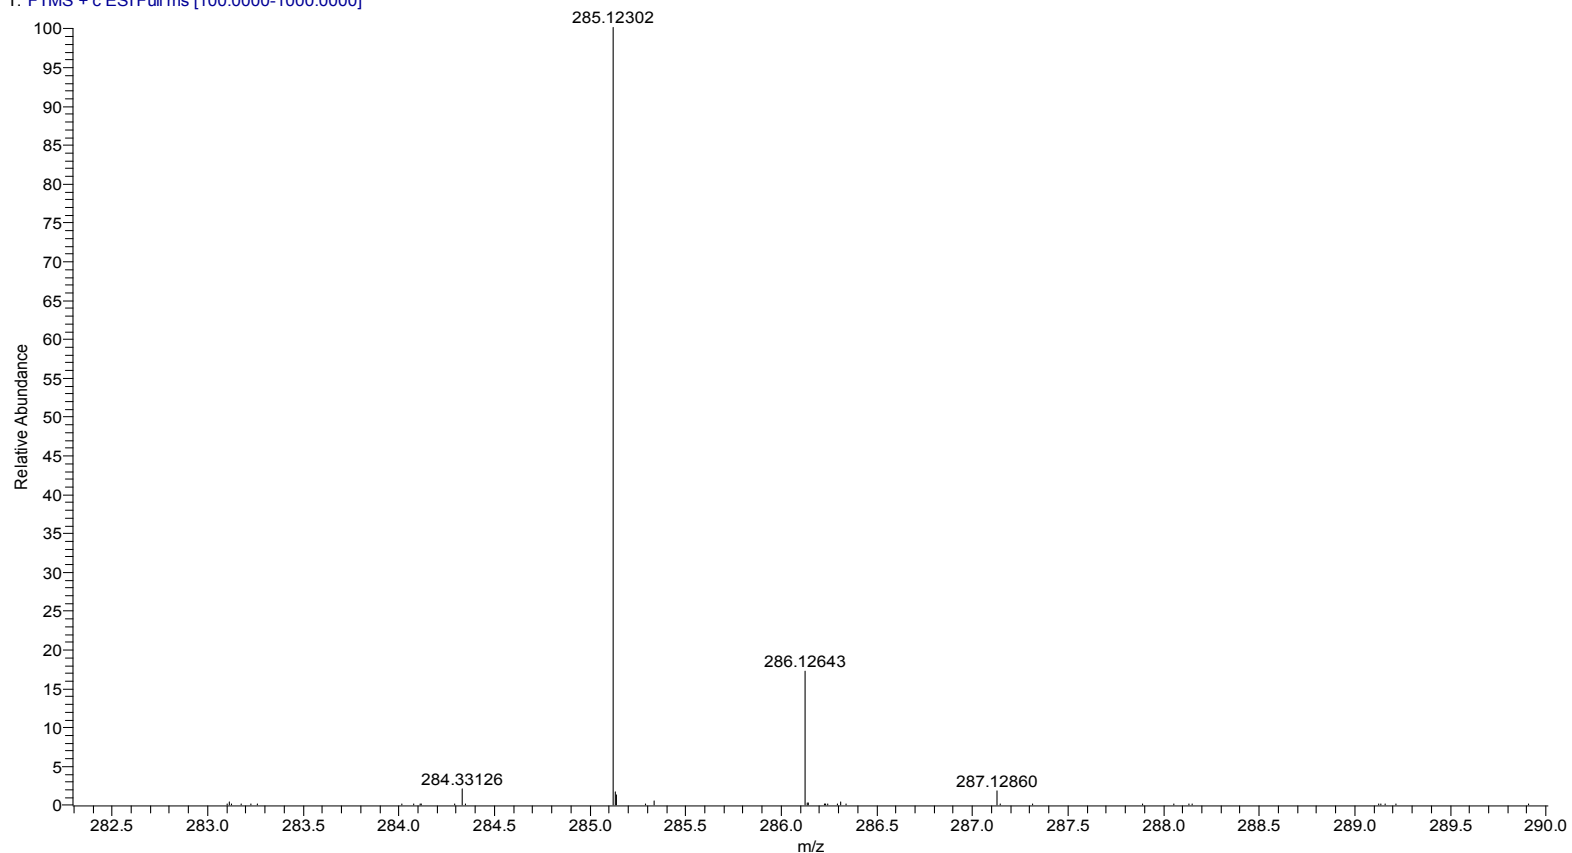

SPECTRUM - simulation :

| m/z       | Theo. Mass | Delta (ppm) | RDB equiv. | Composition   |
|-----------|------------|-------------|------------|---------------|
| 285.12302 | 285.12337  | -1.22       | 9.5        | C16 H17 N2 O3 |

**Figure S17.** HR-ESI-MS spectrum of aspercarboline C (**3**).

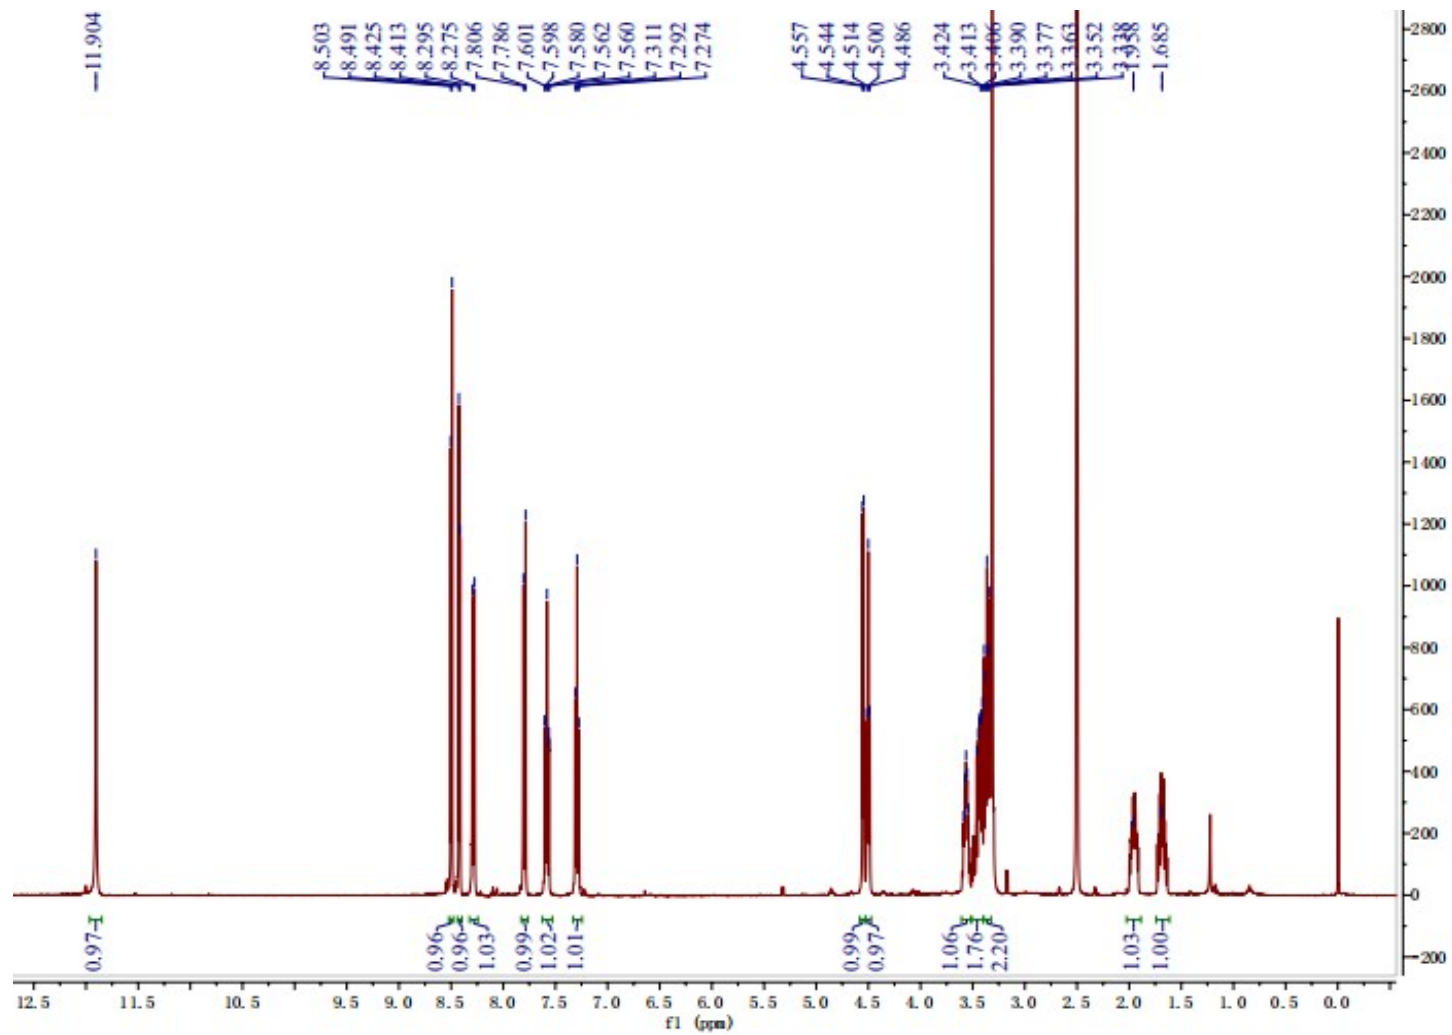

**Figure S18.**  $^1\text{H}$  NMR spectrum (400 MHz,  $\text{DMSO-}d_6$ ) of aspercarboline C (**3**)

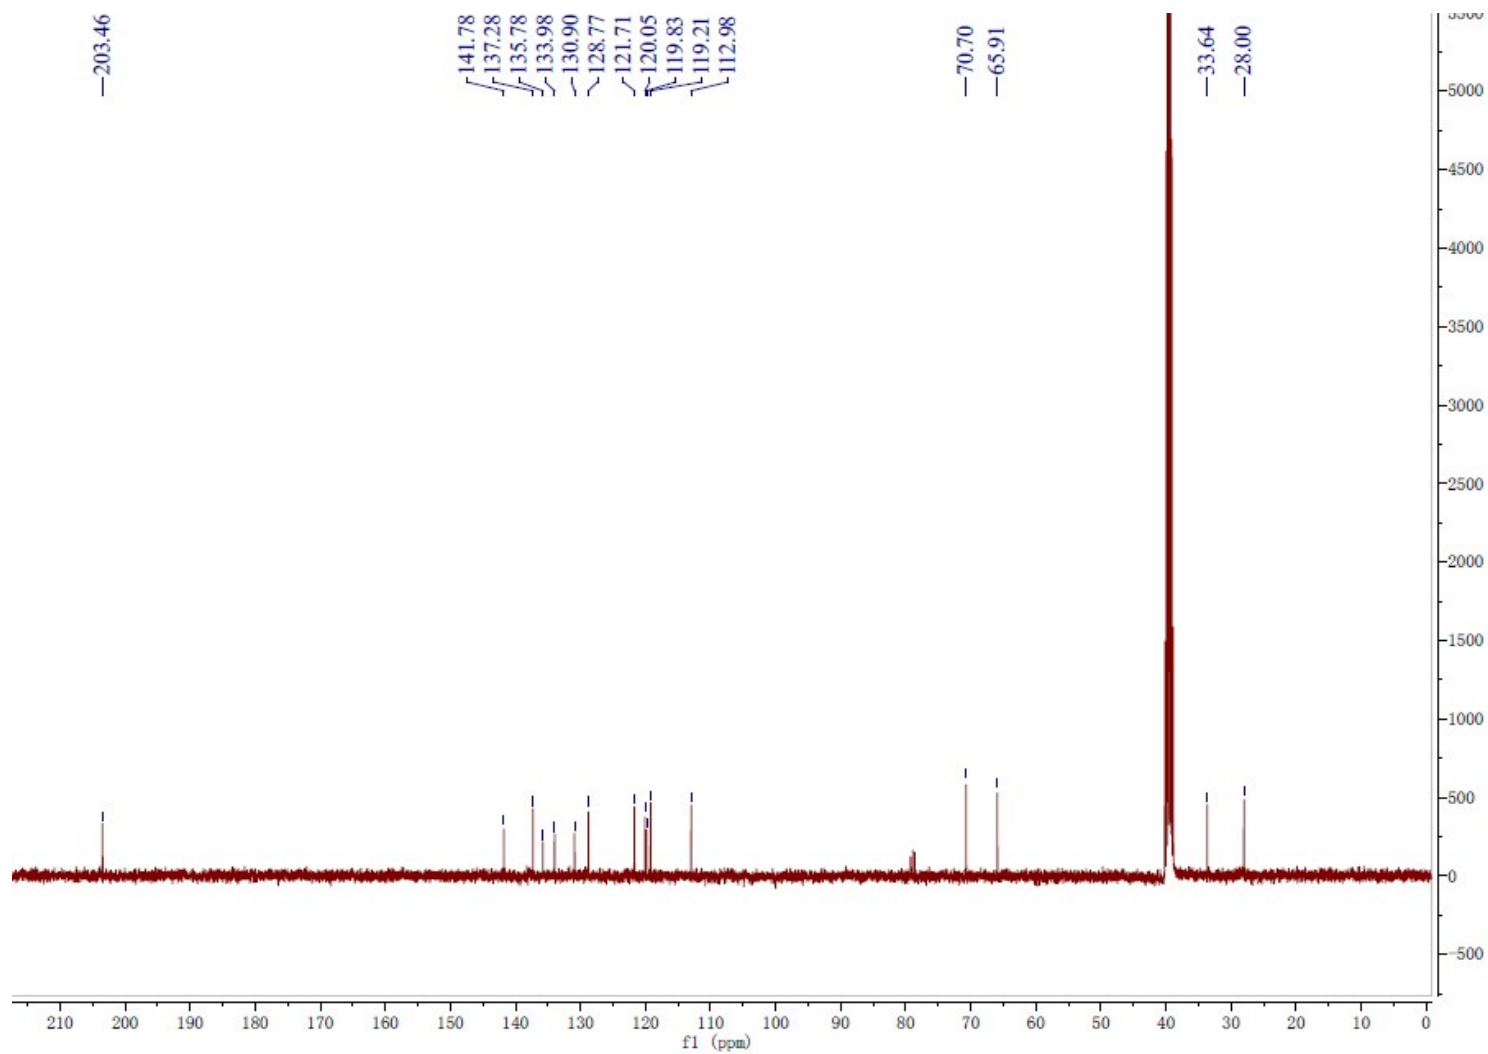

**Figure S19.**  $^{13}\text{C}$  NMR spectrum (100 MHz,  $\text{DMSO-}d_6$ ) of aspercarboline C (**3**)

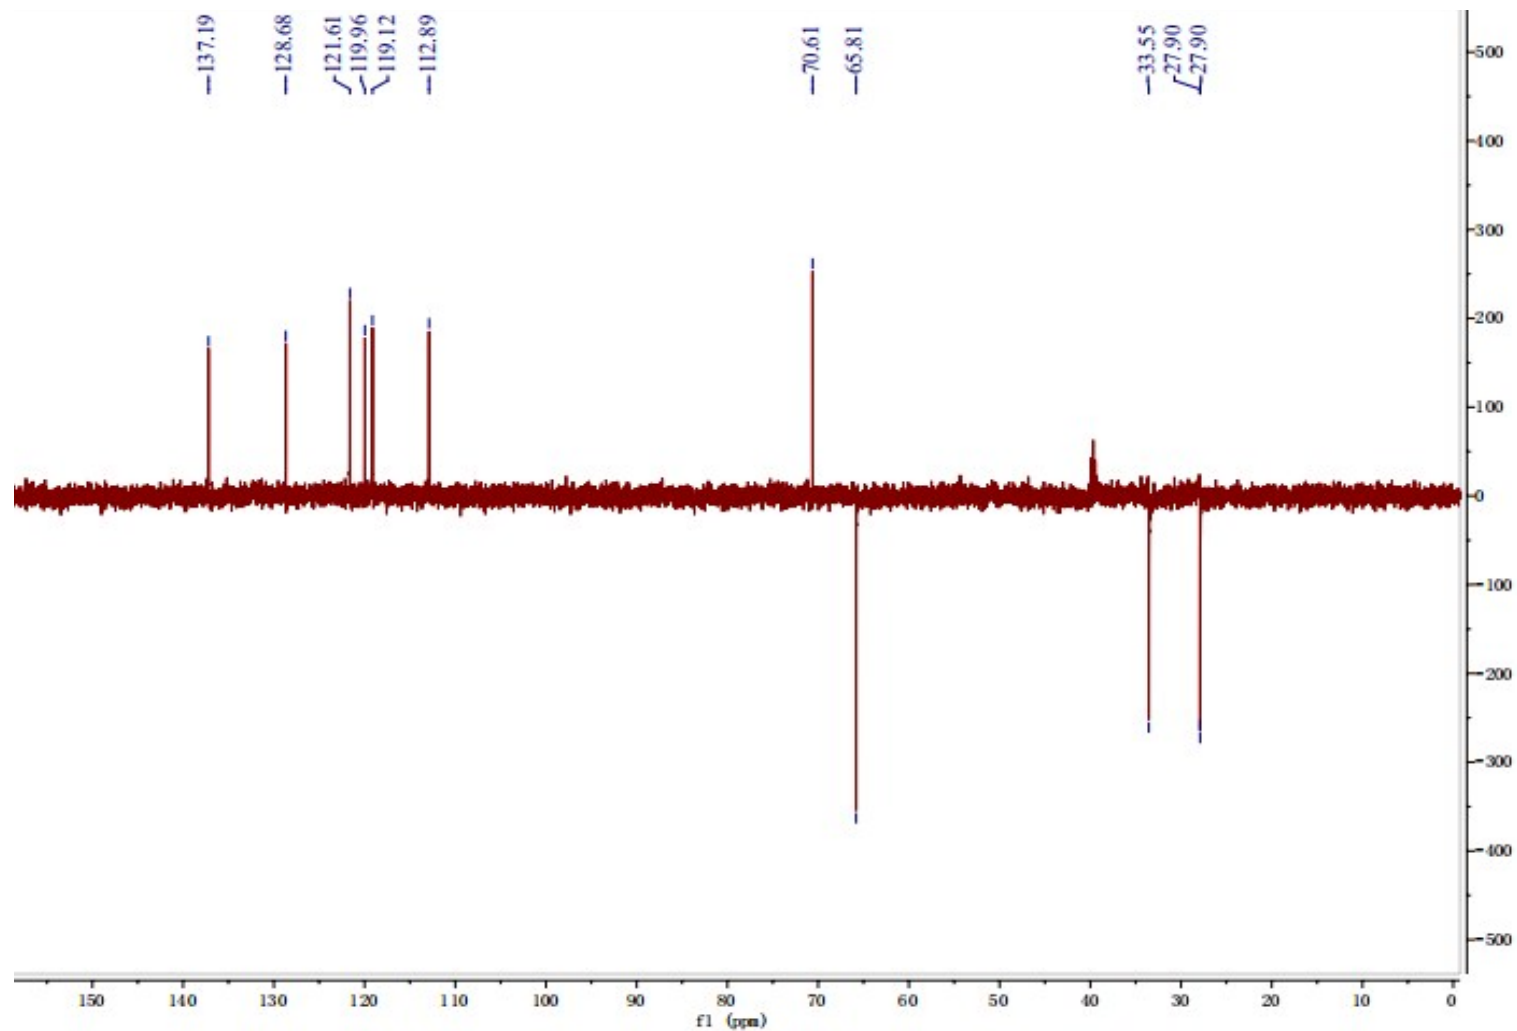

**Figure S20.** DEPT 135 spectrum (100 MHz, DMSO-*d*<sub>6</sub>) of aspercarboline C (3)

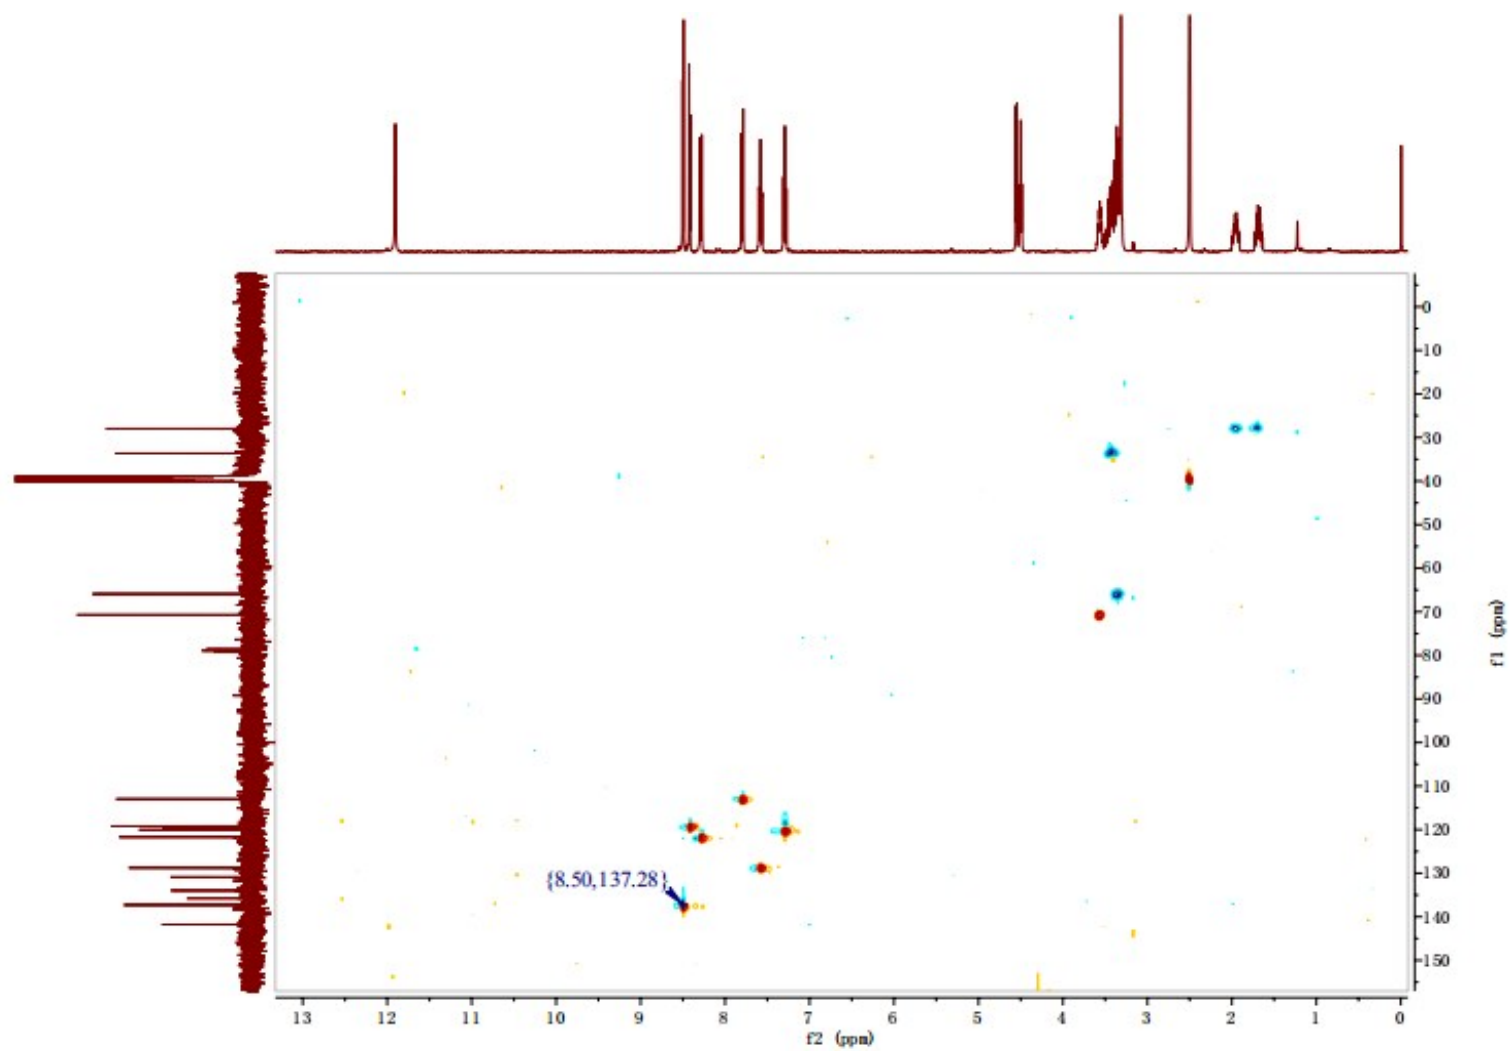

**Figure S21.** HSQC spectrum of aspercarboline C (**3**)



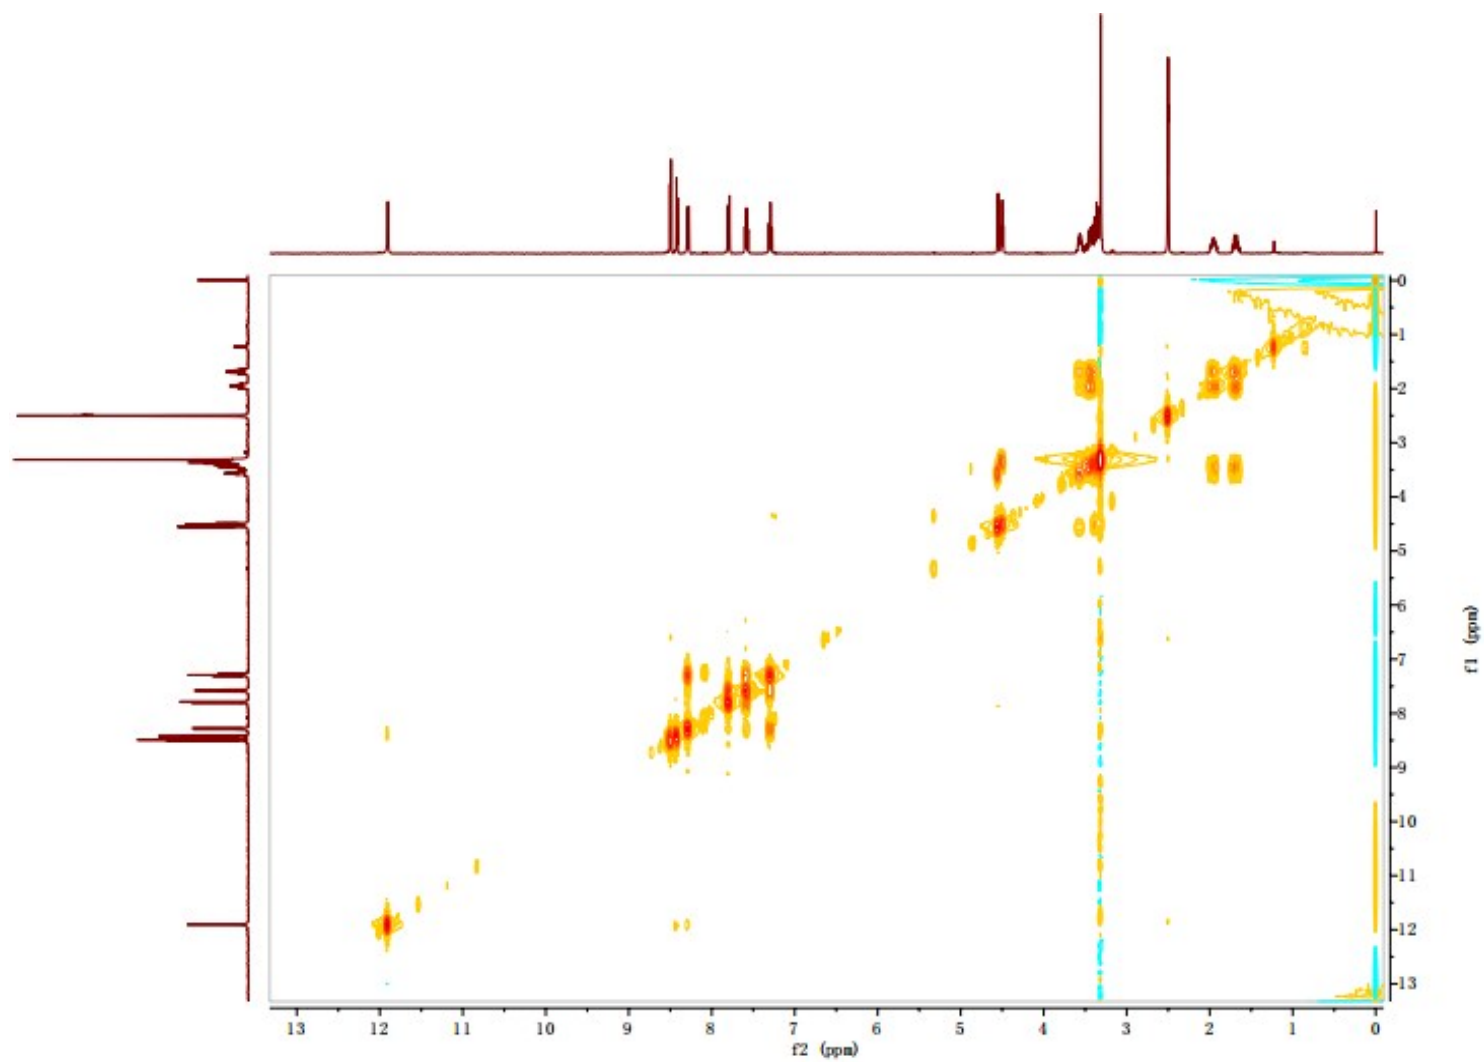

**Figure S22.**  $^1\text{H}$ - $^1\text{H}$  COSY spectrum of aspercarboline C (**3**)

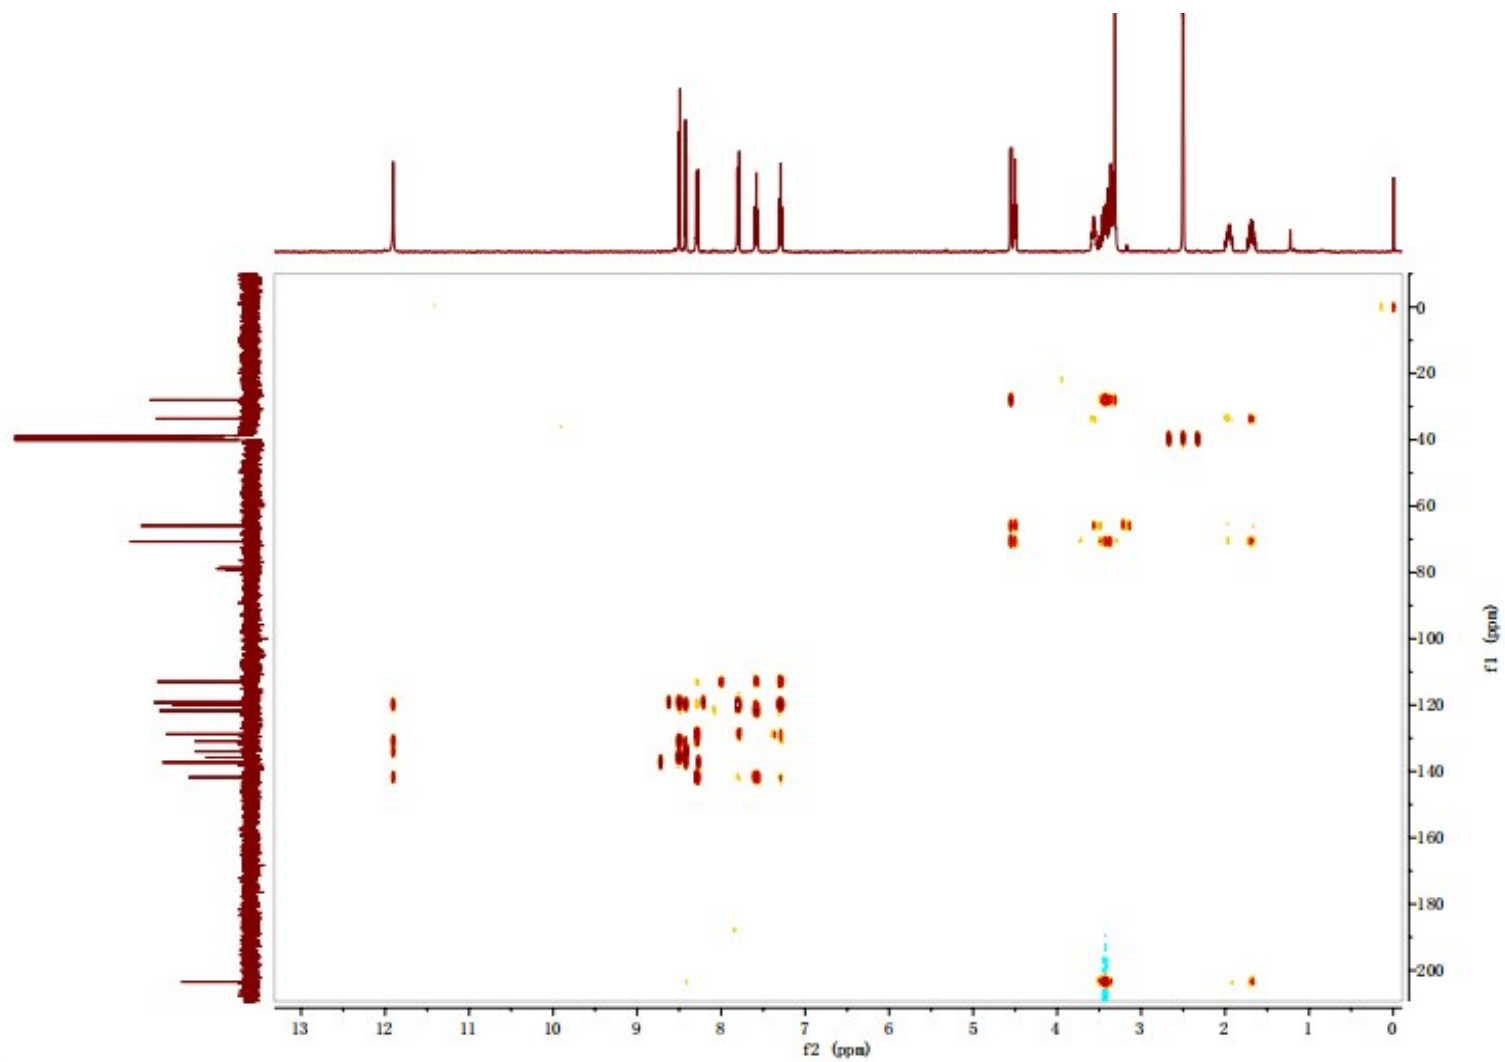

**Figure S23.** HMBC spectrum of aspercarboline C (**3**)

XBB4-25(2)-3-6 □ □ #32 RT: 0.09 AV: 1 NL: 1.47E8  
T: FTMS + c ESI Full ms [200.0000-2000.0000]

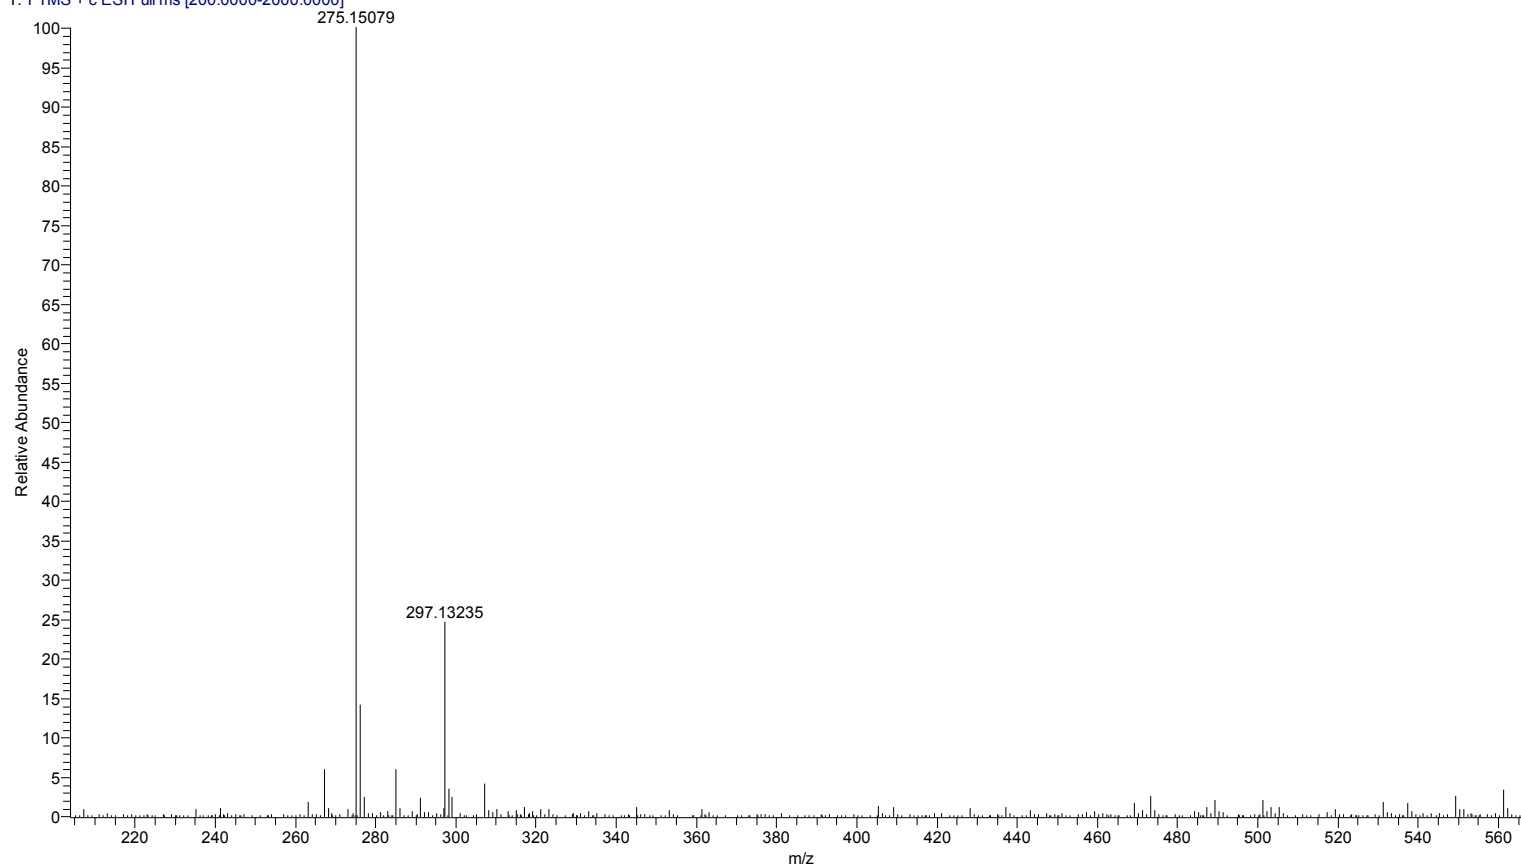

SPECTRUM - simulation :

| m/z       | Theo. Mass | Delta (ppm) | RDB equiv. | Composition   |
|-----------|------------|-------------|------------|---------------|
| 275.15079 | 275.15025  | 0.54        | 7.5        | C14 H19 O2 N4 |

**Figure S24.** HR-ESI-MS spectrum of asperdione A (**13**).

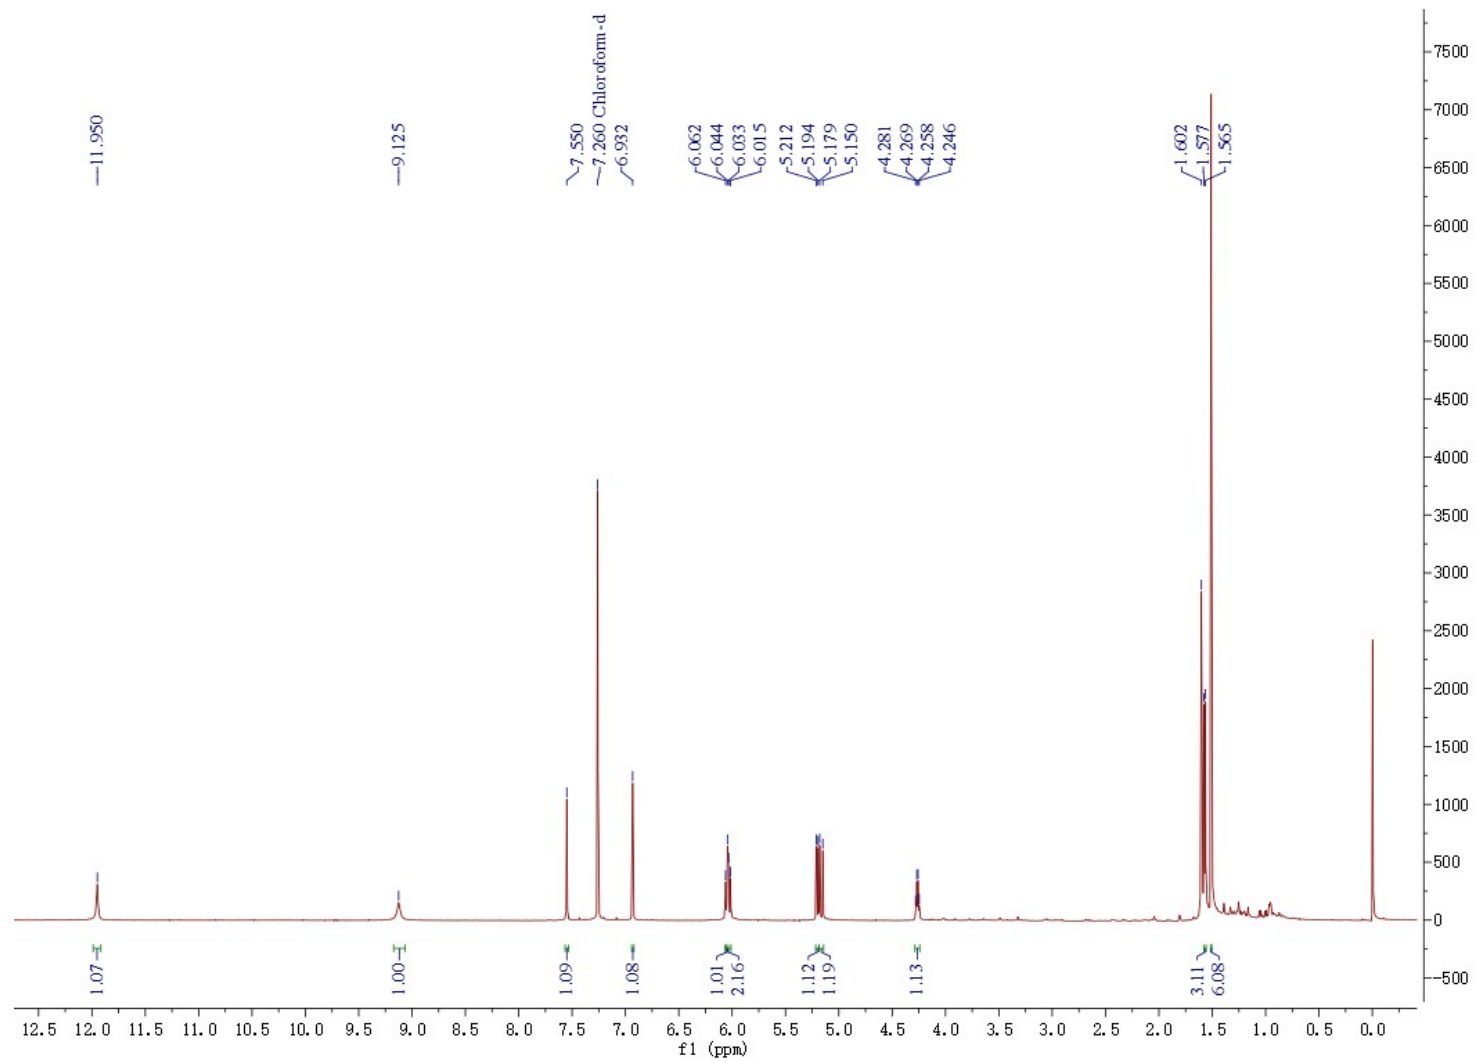

Figure S25.  $^1\text{H}$  NMR spectrum (600 MHz,  $\text{CDCl}_3$ ) of asperdione A (**13**)

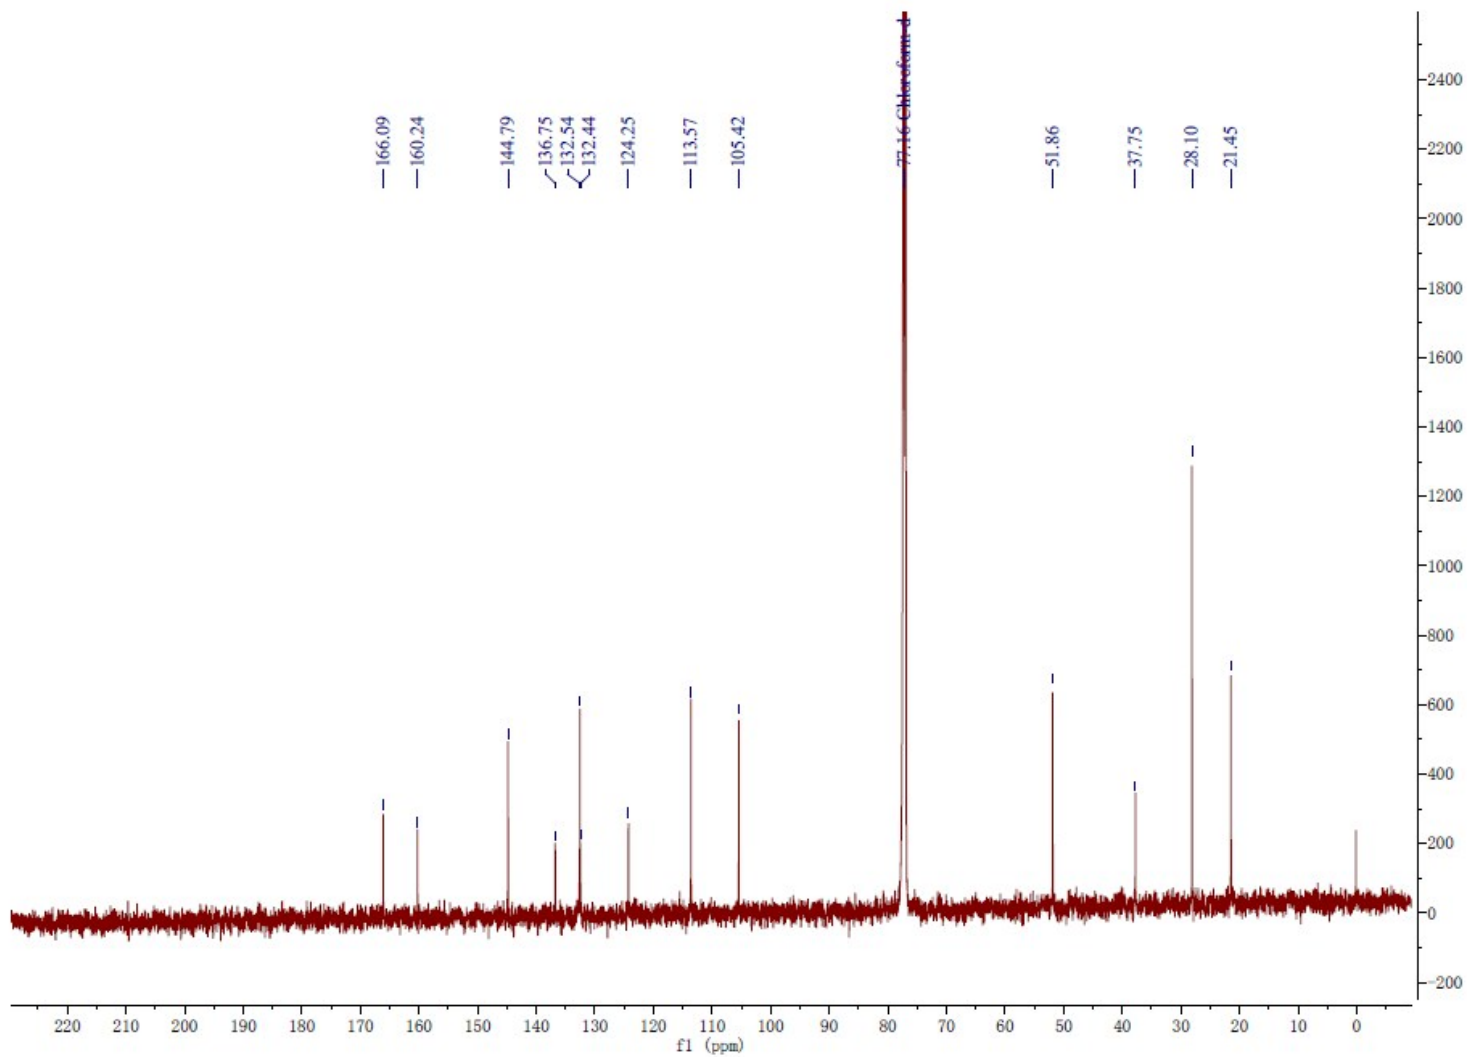

Figure S26.  $^{13}\text{C}$  NMR spectrum (150 MHz,  $\text{CDCl}_3$ ) of asperdione A (**13**)

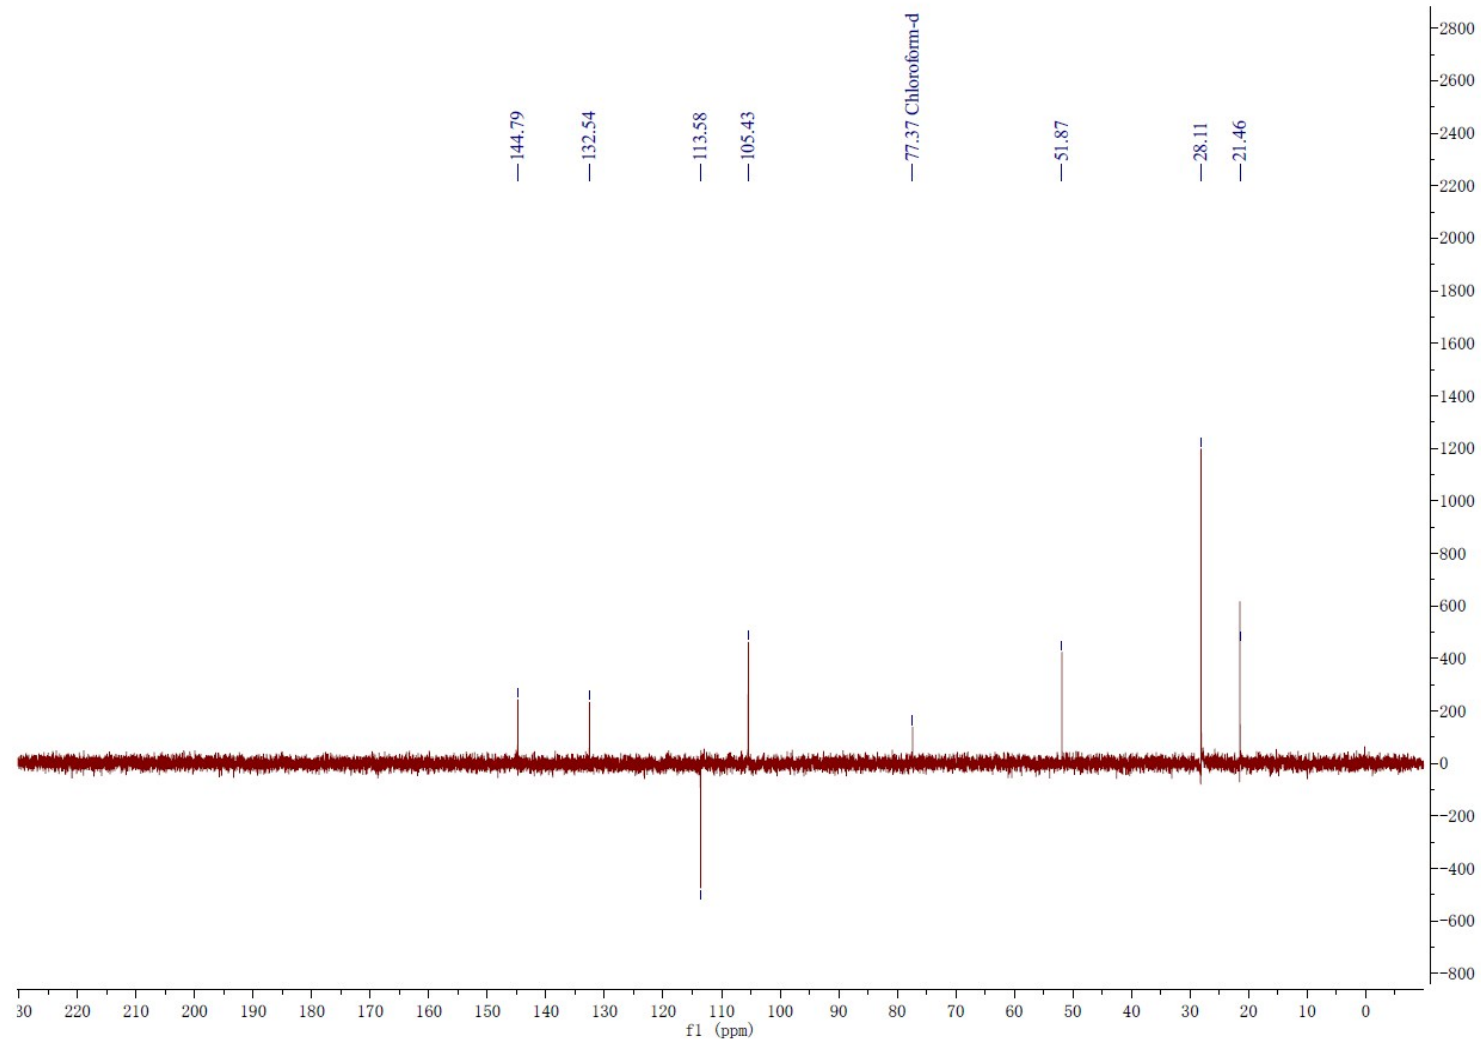

**Figure S27.** DEPT 135 spectrum (150 MHz, CDCl<sub>3</sub>) of asperdione A (**13**)

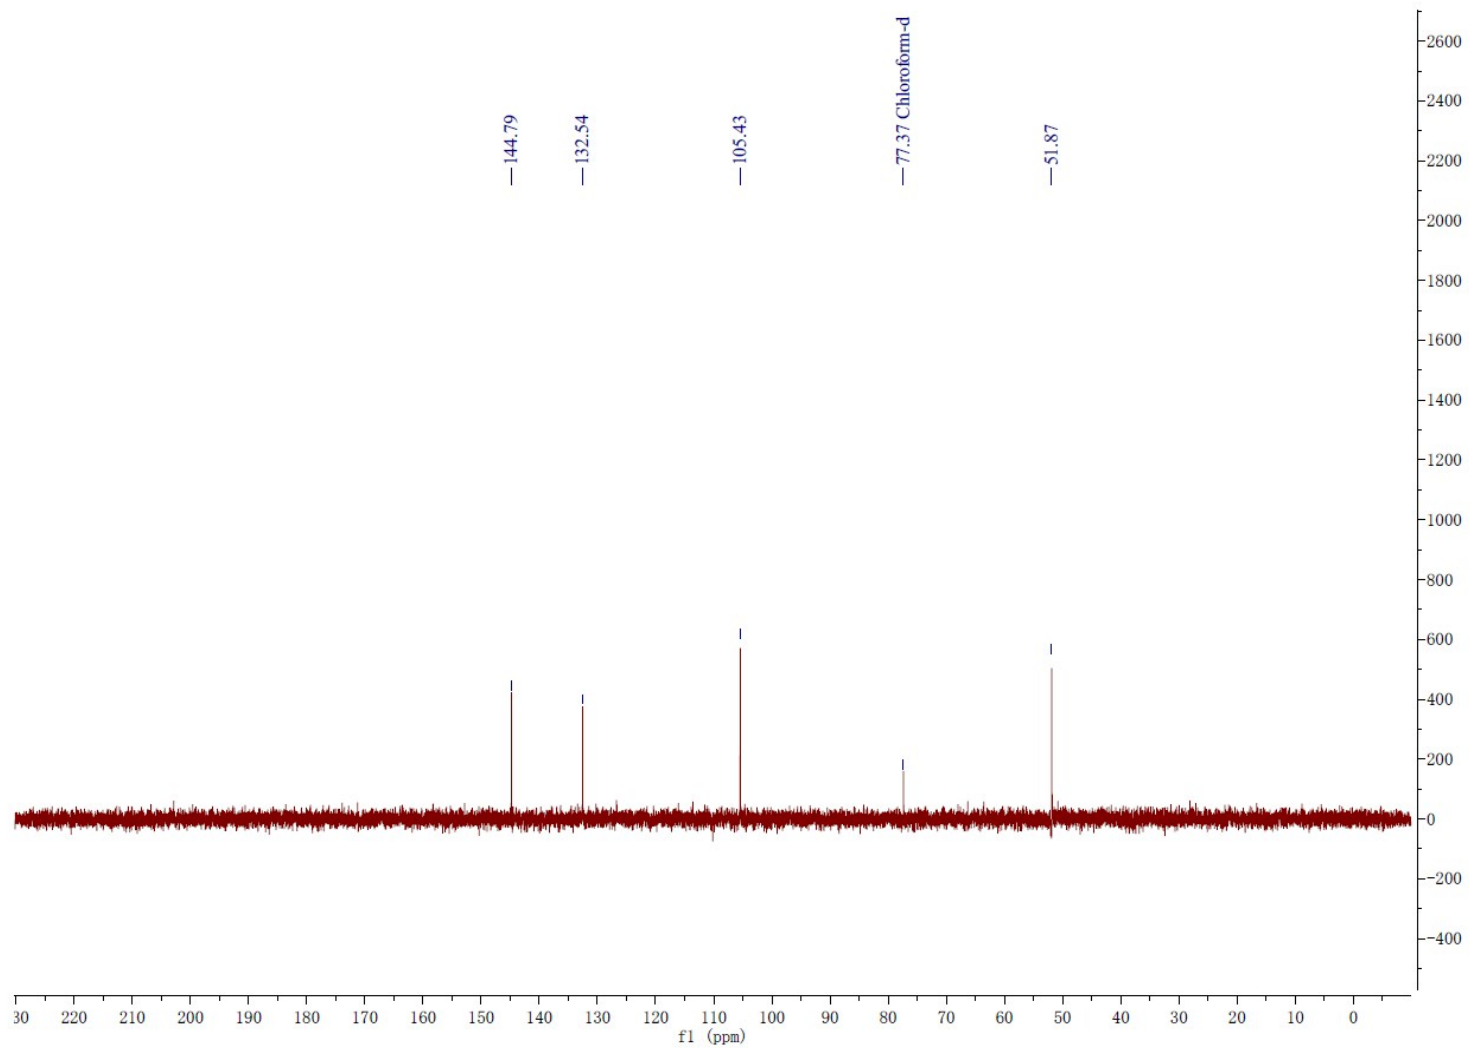

**Figure S28.** DEPT 90 spectrum (150 MHz, CDCl<sub>3</sub>) of asperdione A (**13**)

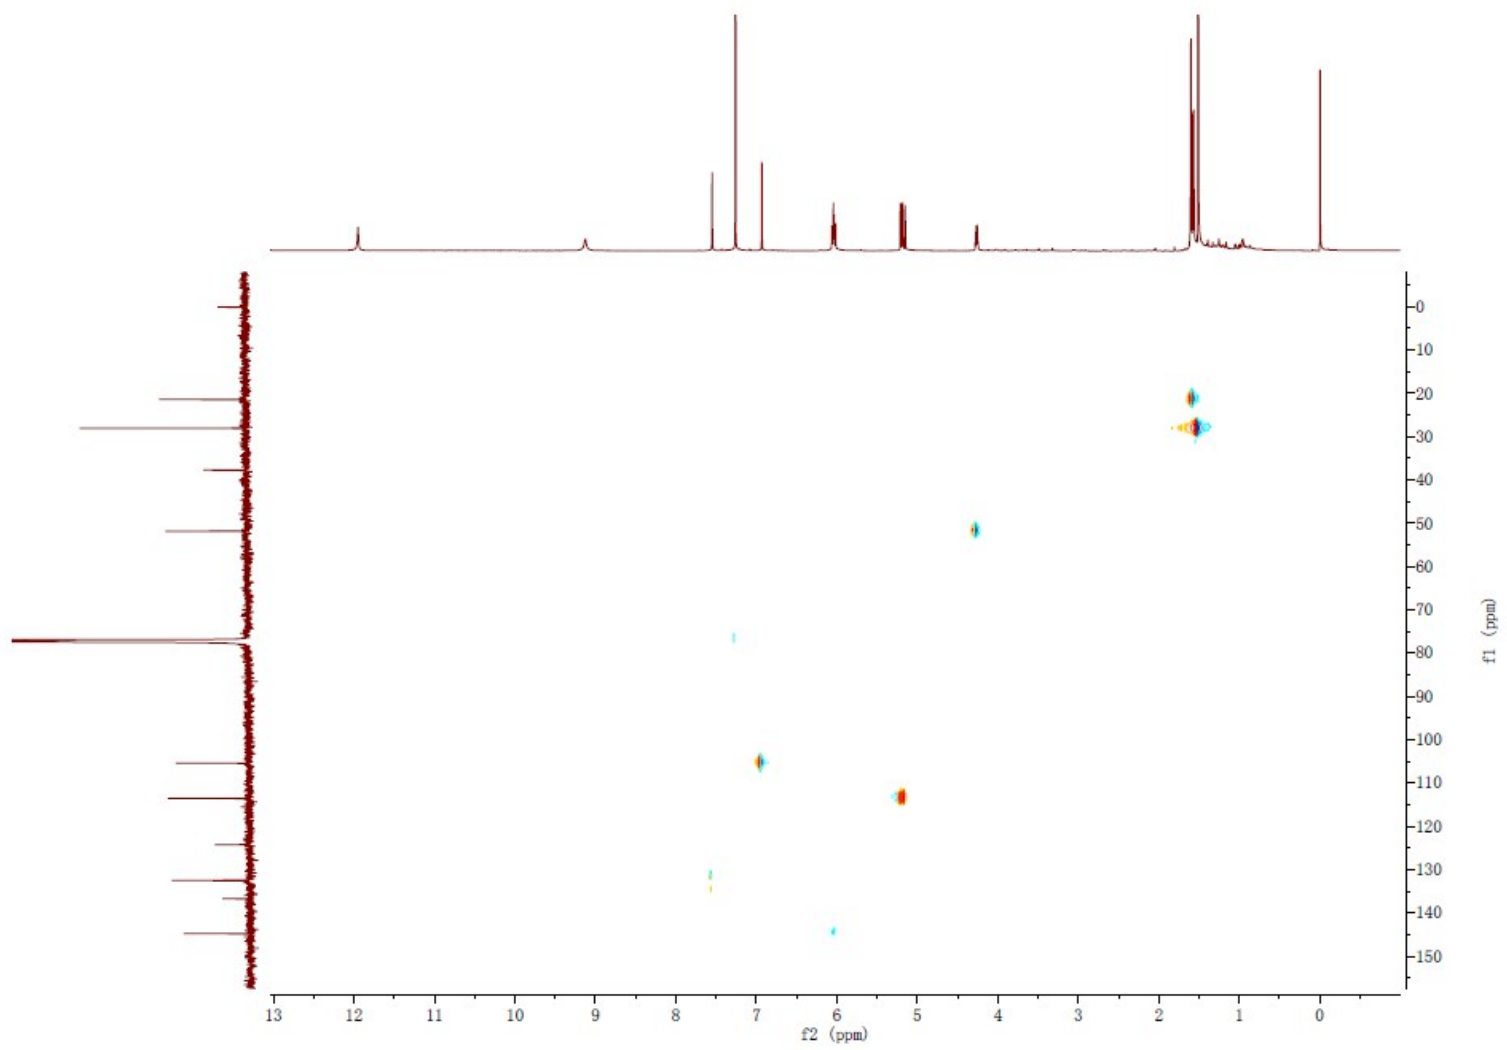

**Figure S29.** HSQC spectrum of asperdione A (**13**)



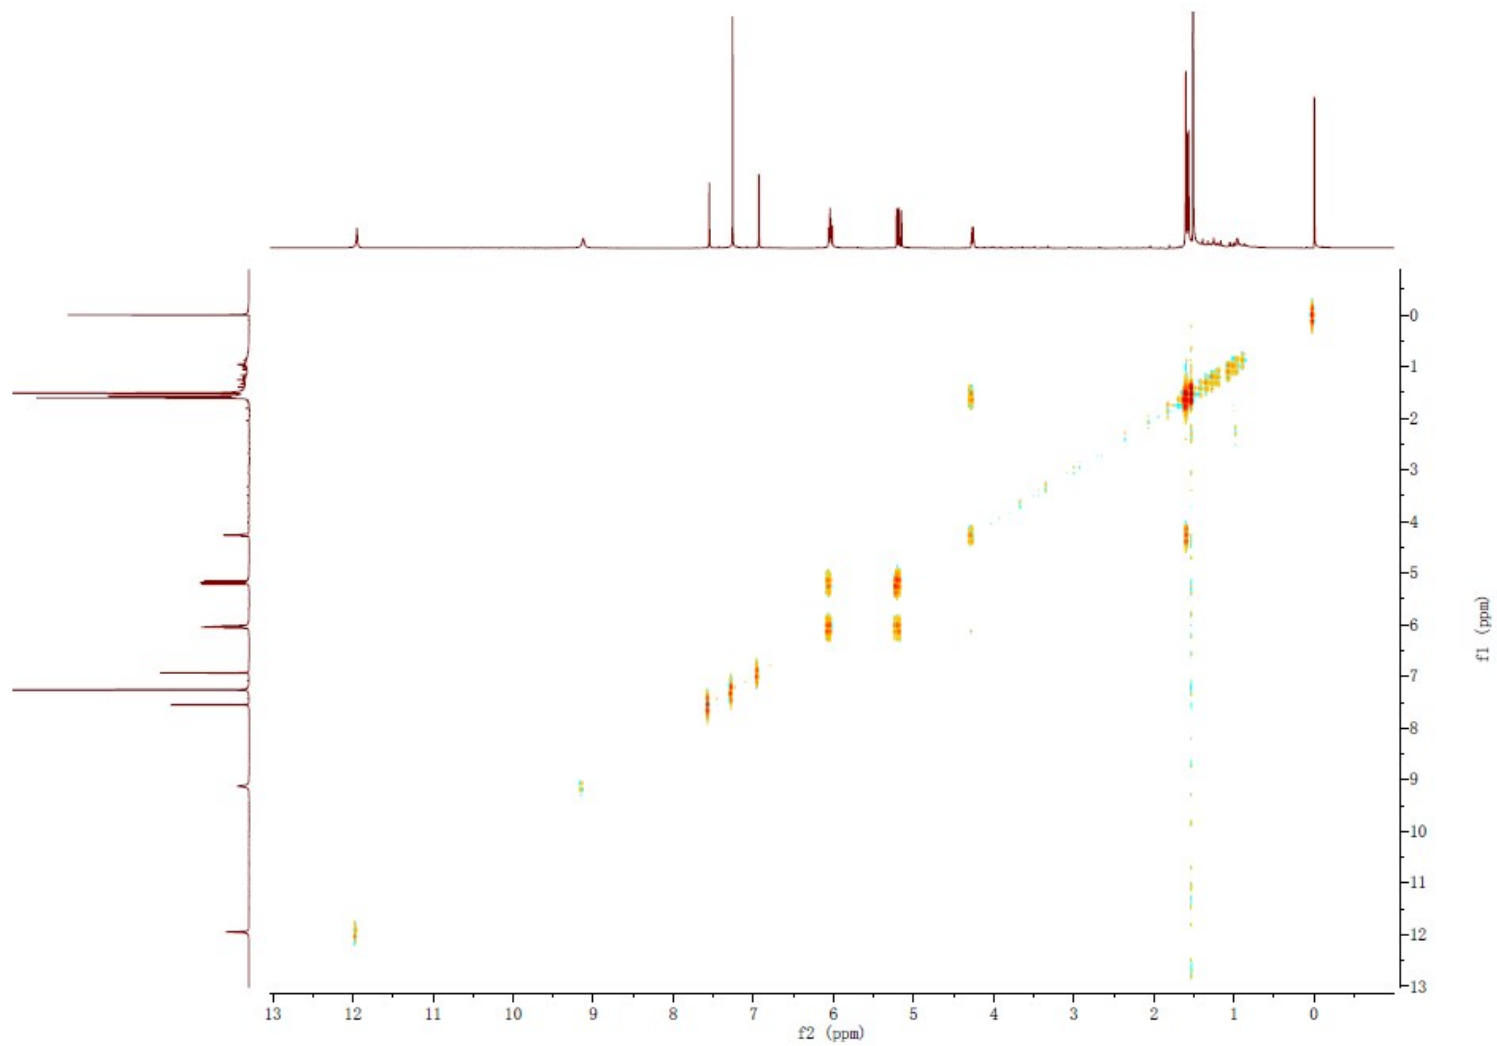

**Figure S30.**  $^1\text{H}$ - $^1\text{H}$  COSY spectrum of asperdione A (**13**)

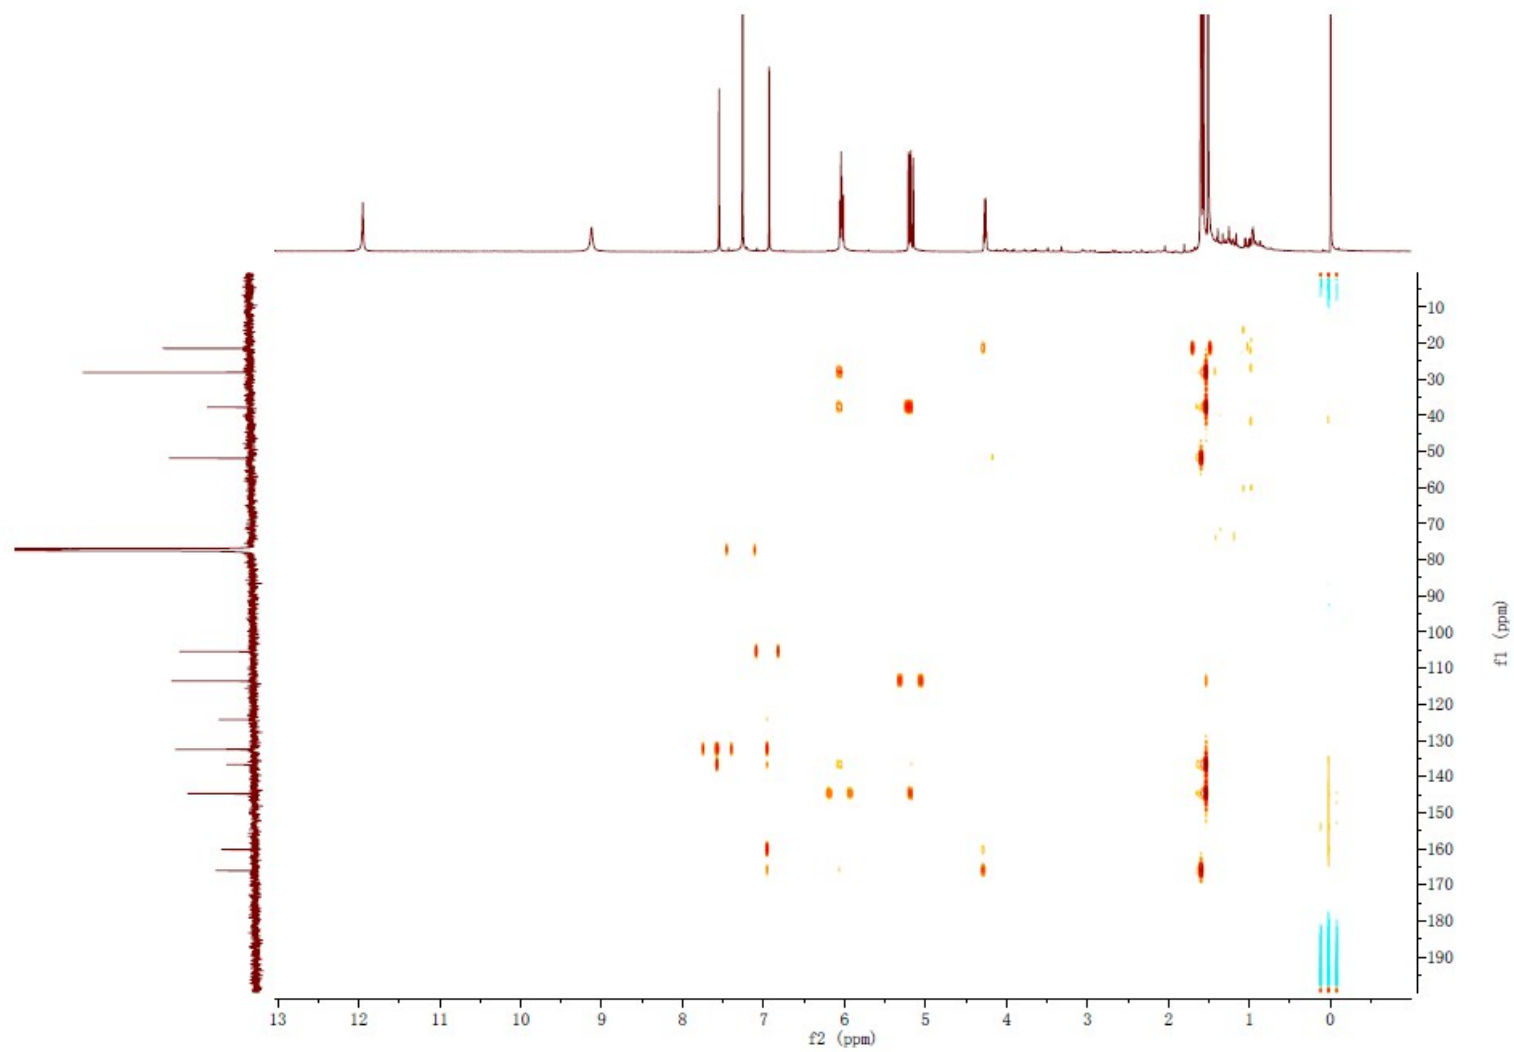

**Figure S31.** HMBC spectrum of asperdione A (**13**)

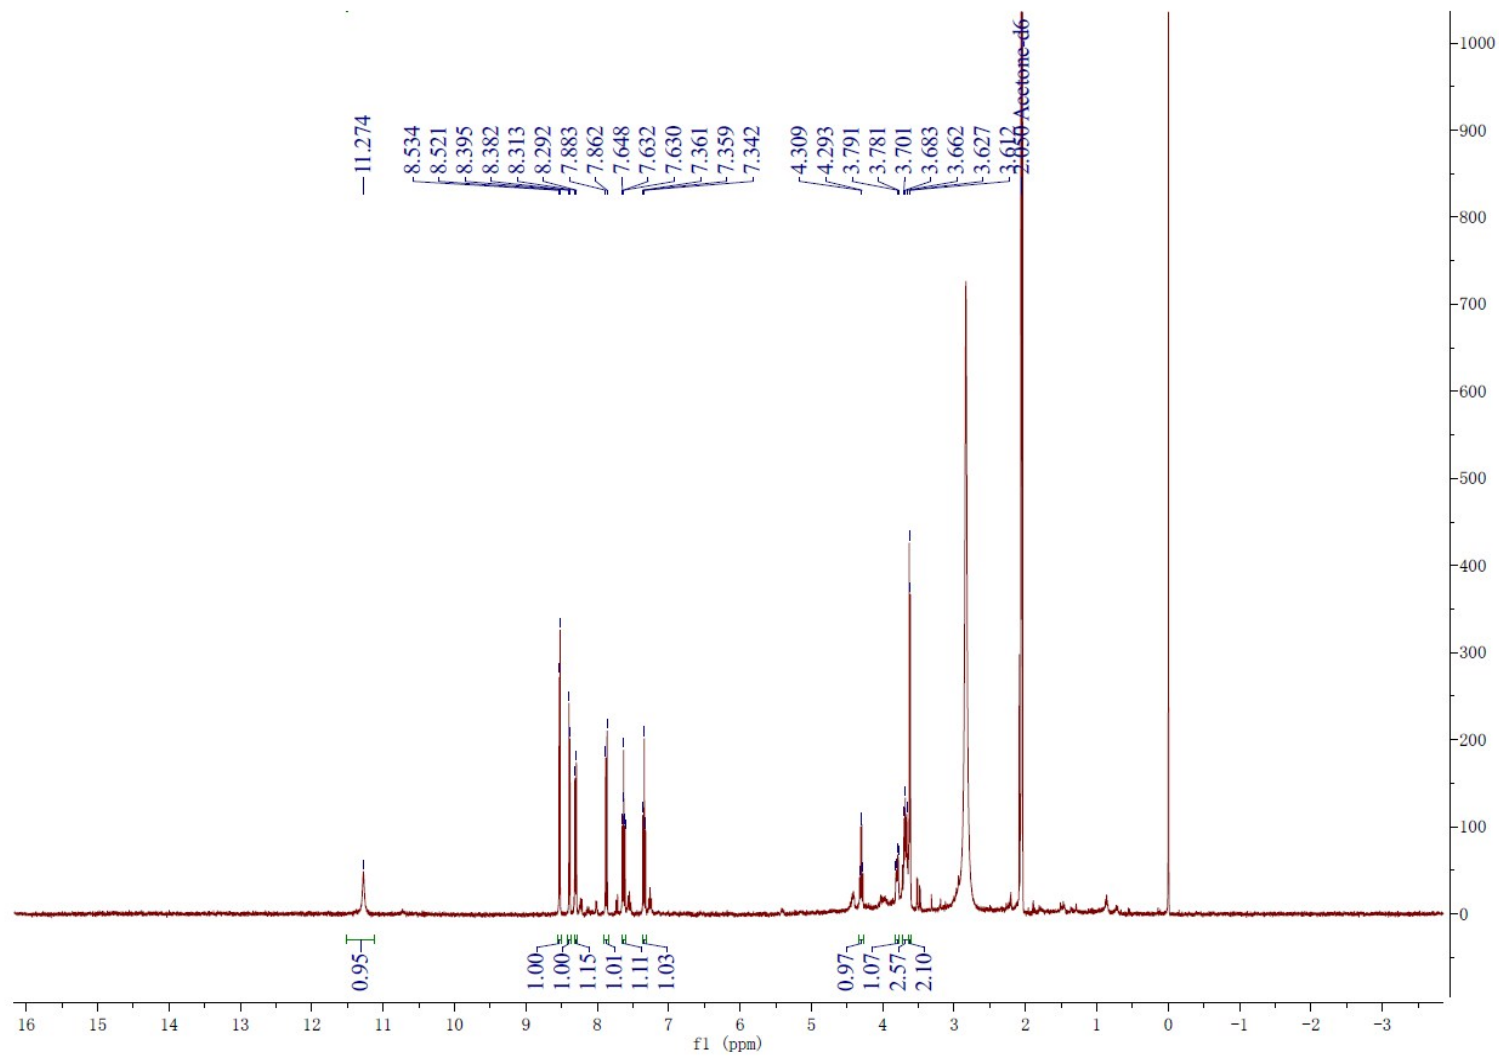

**Figure S32.**  $^1\text{H}$  NMR spectrum (400 MHz, acetone- $d_6$ ) of 1-(1-oxo-3,4,5-trihydroxy-1-pentyl)- $\beta$ -carboline (**4**)

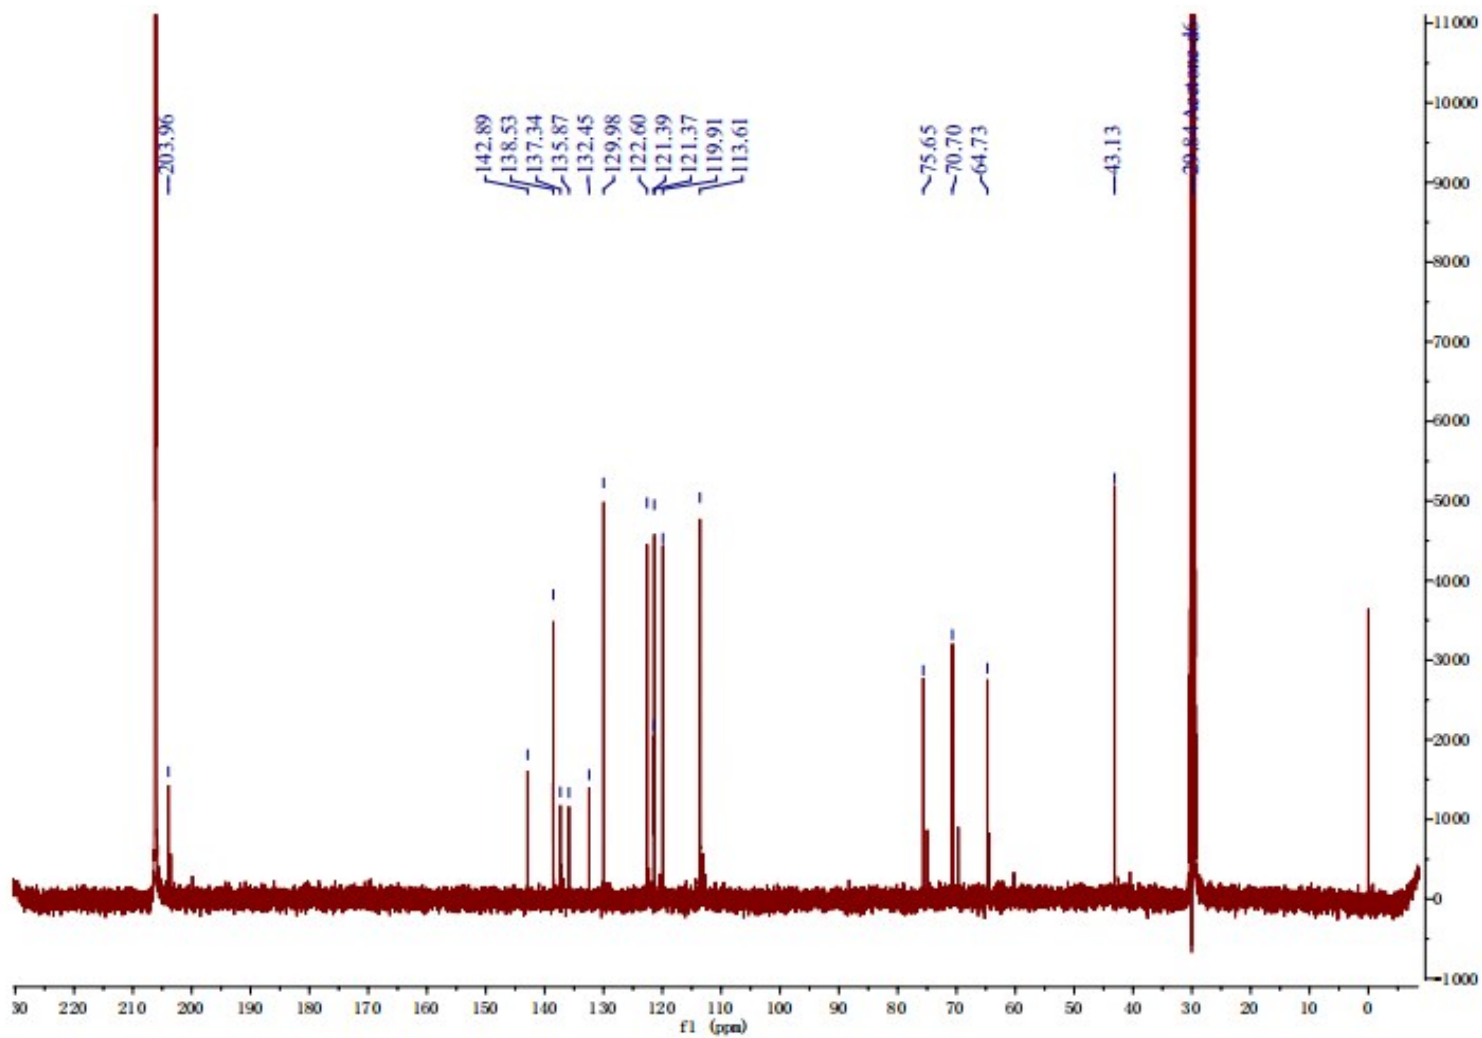

**Figure S33.**  $^{13}\text{C}$  NMR spectrum (100 MHz, acetone- $\text{d}_6$ ) of 1-(1-oxo-3,4,5-trihydroxy-1-pentyl)- $\beta$ -carboline (**4**)

30-3-1-1-C3-3 #2-4 RT: 0.01-0.03 AV: 3 NL: 8.02E7  
T: FTMS + c ESI Full ms [100.0000-1000.0000]

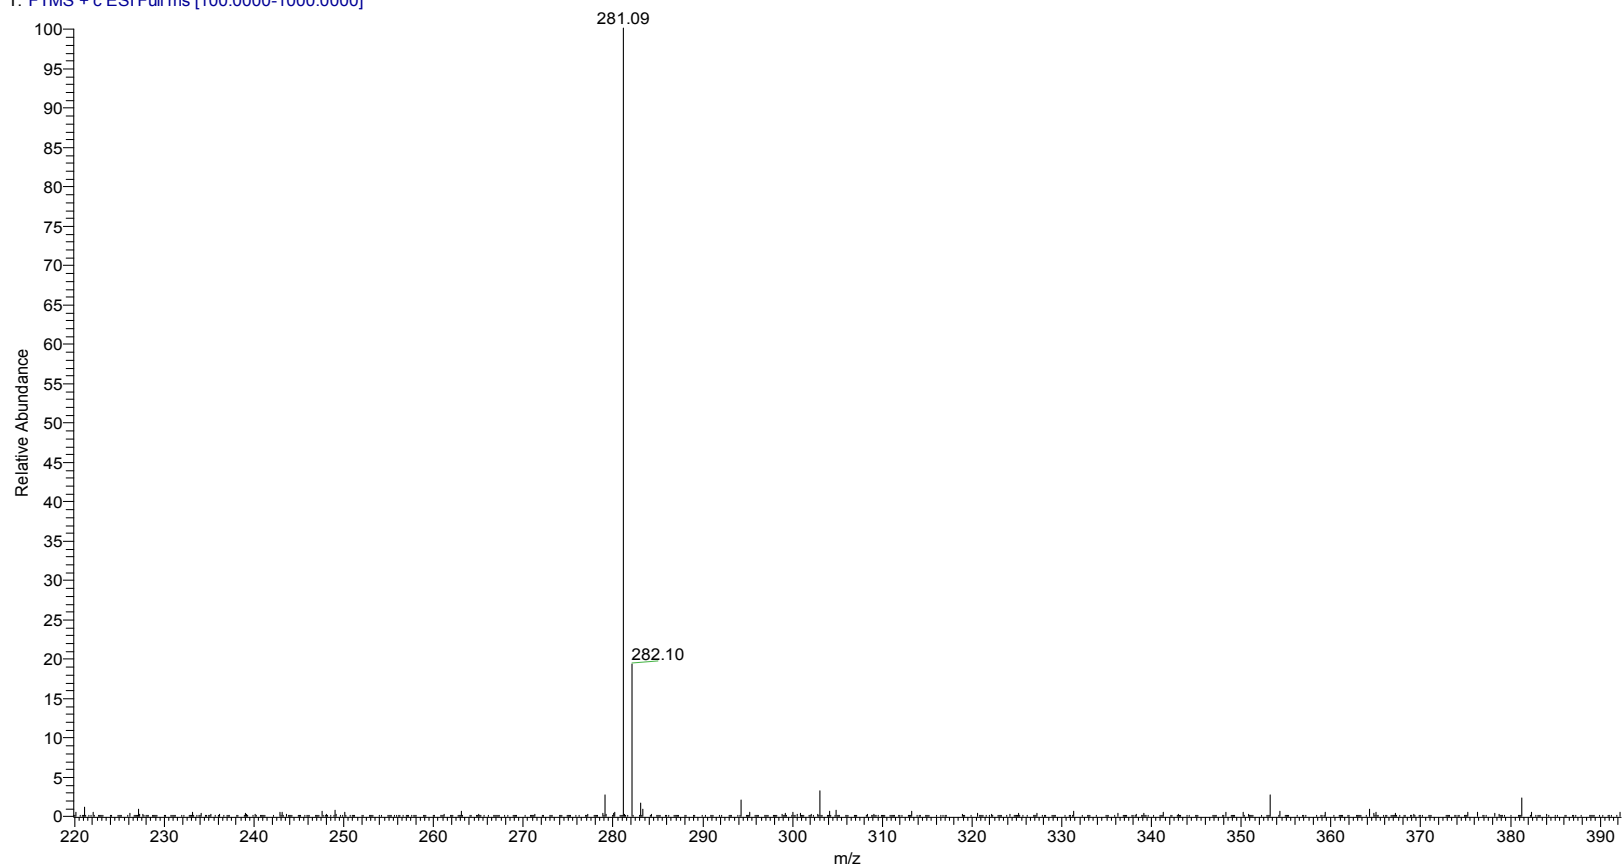

SPECTRUM - simulation :

| m/z       | Theo. Mass | Delta (ppm) | RDB equiv. | Composition   |
|-----------|------------|-------------|------------|---------------|
| 281.09241 | 281.09207  | 1.21        | 11.5       | C16 H13 O3 N2 |

**Figure S34.** HR-ESI-MS spectrum of 4-(9*H*- $\beta$ -Carbolin-1-yl)-4-oxobut-2-enoic acid methyl ester (**5**).

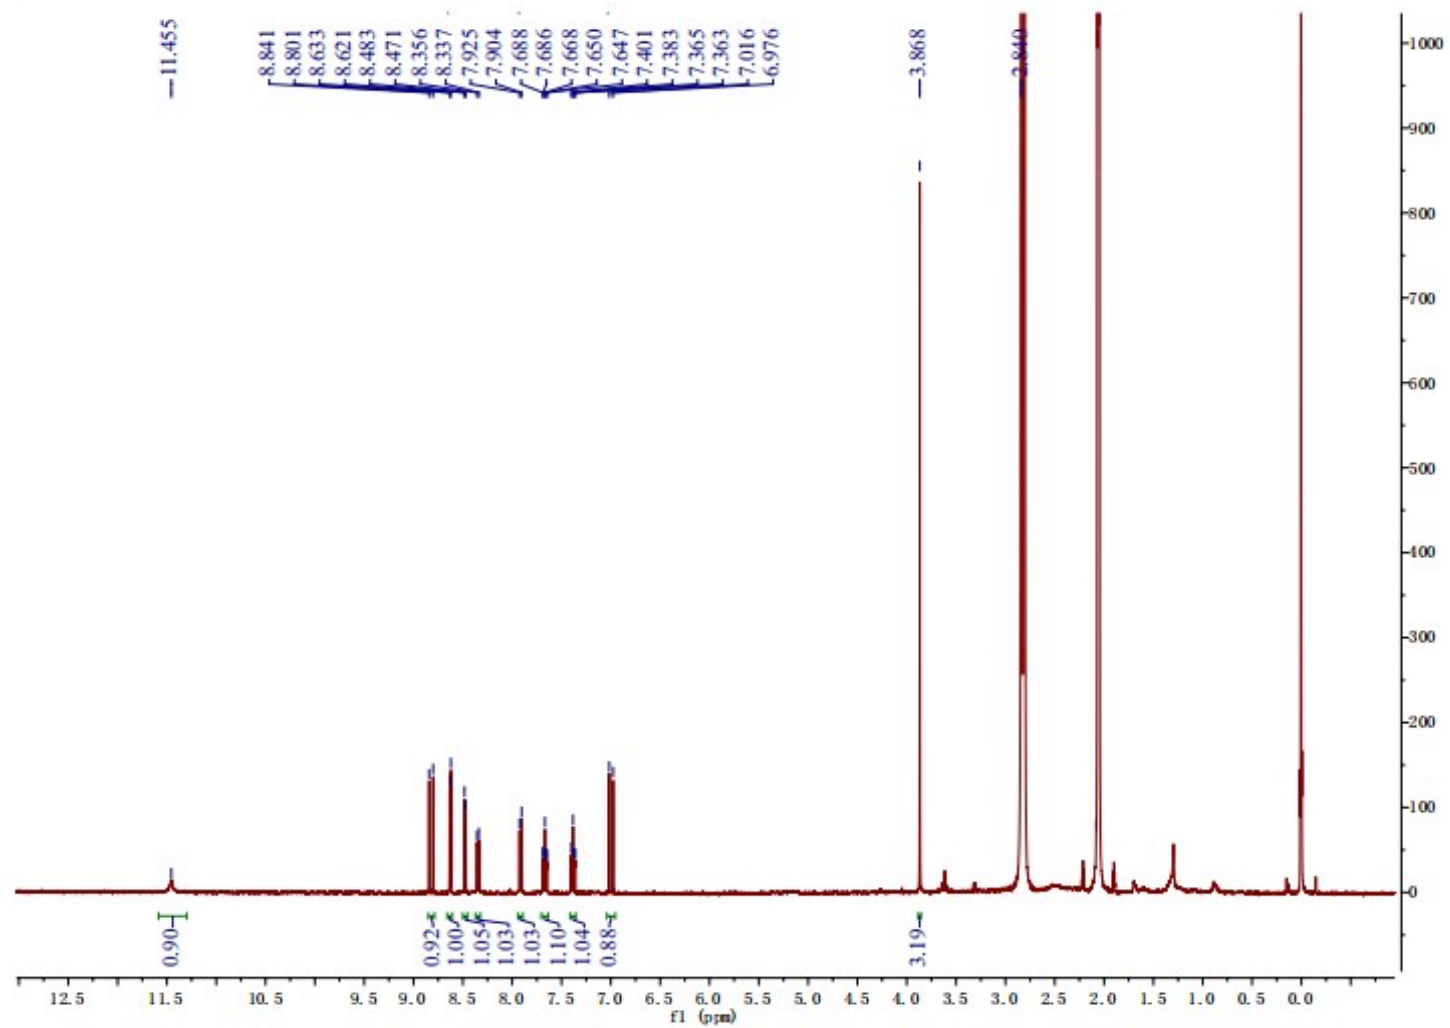

**Figure S35.**  $^1\text{H}$  NMR spectrum (400 MHz, acetone- $d_6$ ) of 4-(9H- $\beta$ -Carbolin-1-yl)-4-oxobut-2-enoic acid methyl ester (**5**)

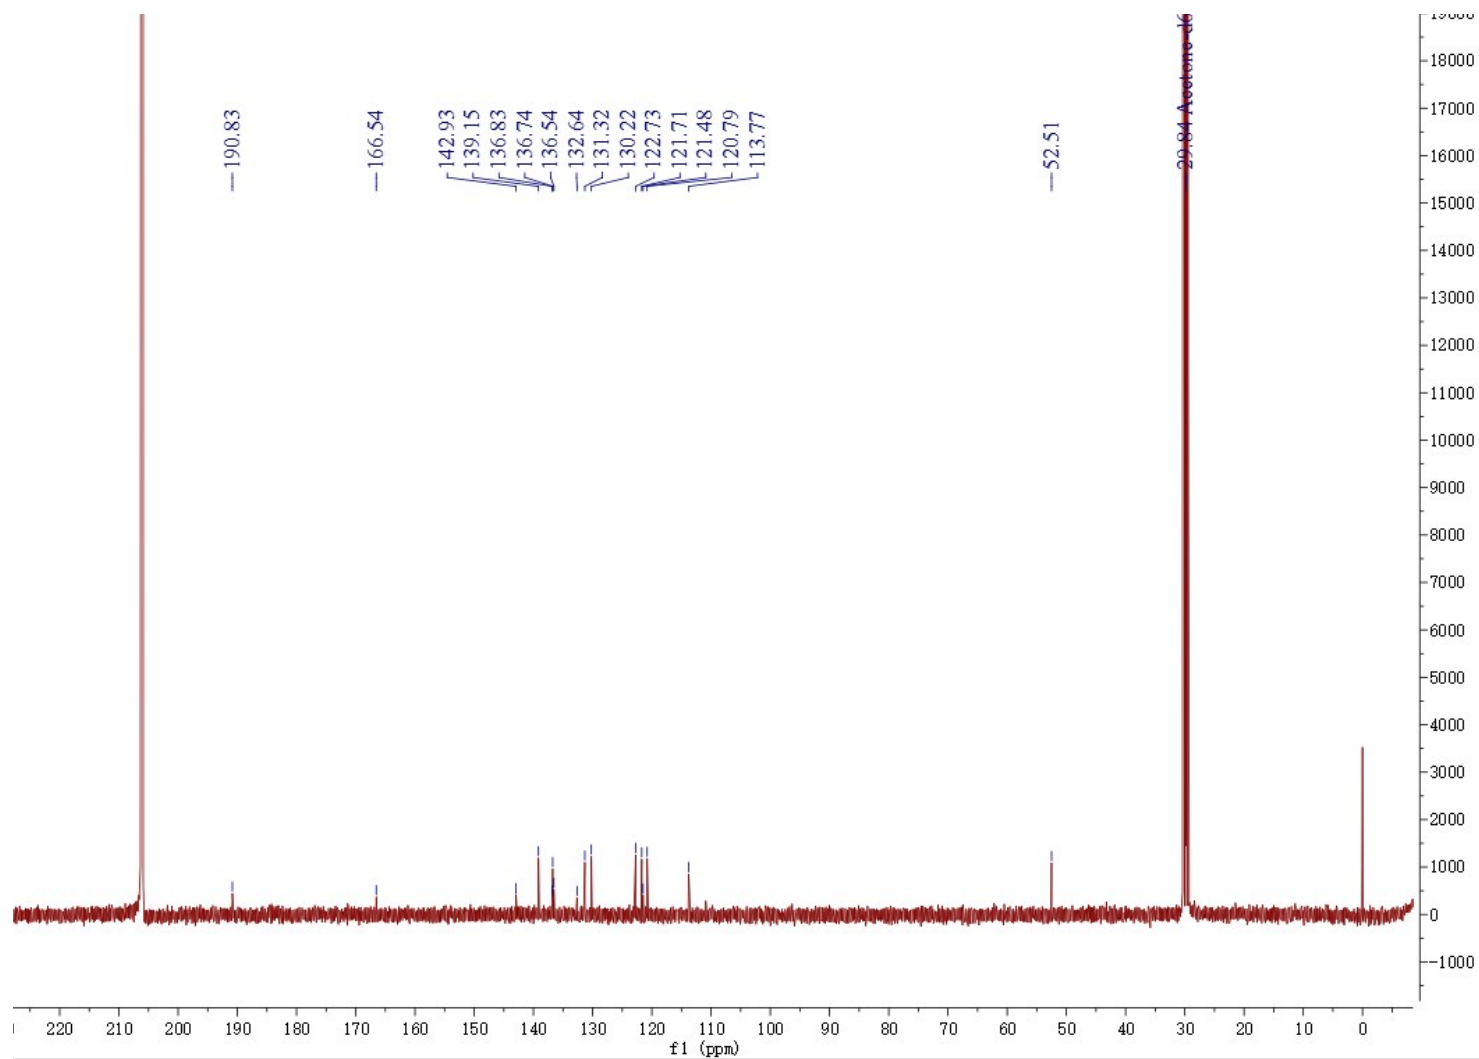

**Figure S36.**  $^{13}\text{C}$  NMR spectrum (100 MHz, acetone- $d_6$ ) of 4-(9H- $\beta$ -Carbolin-1-yl)-4-oxobut-2-enoic acid methyl ester (**5**)

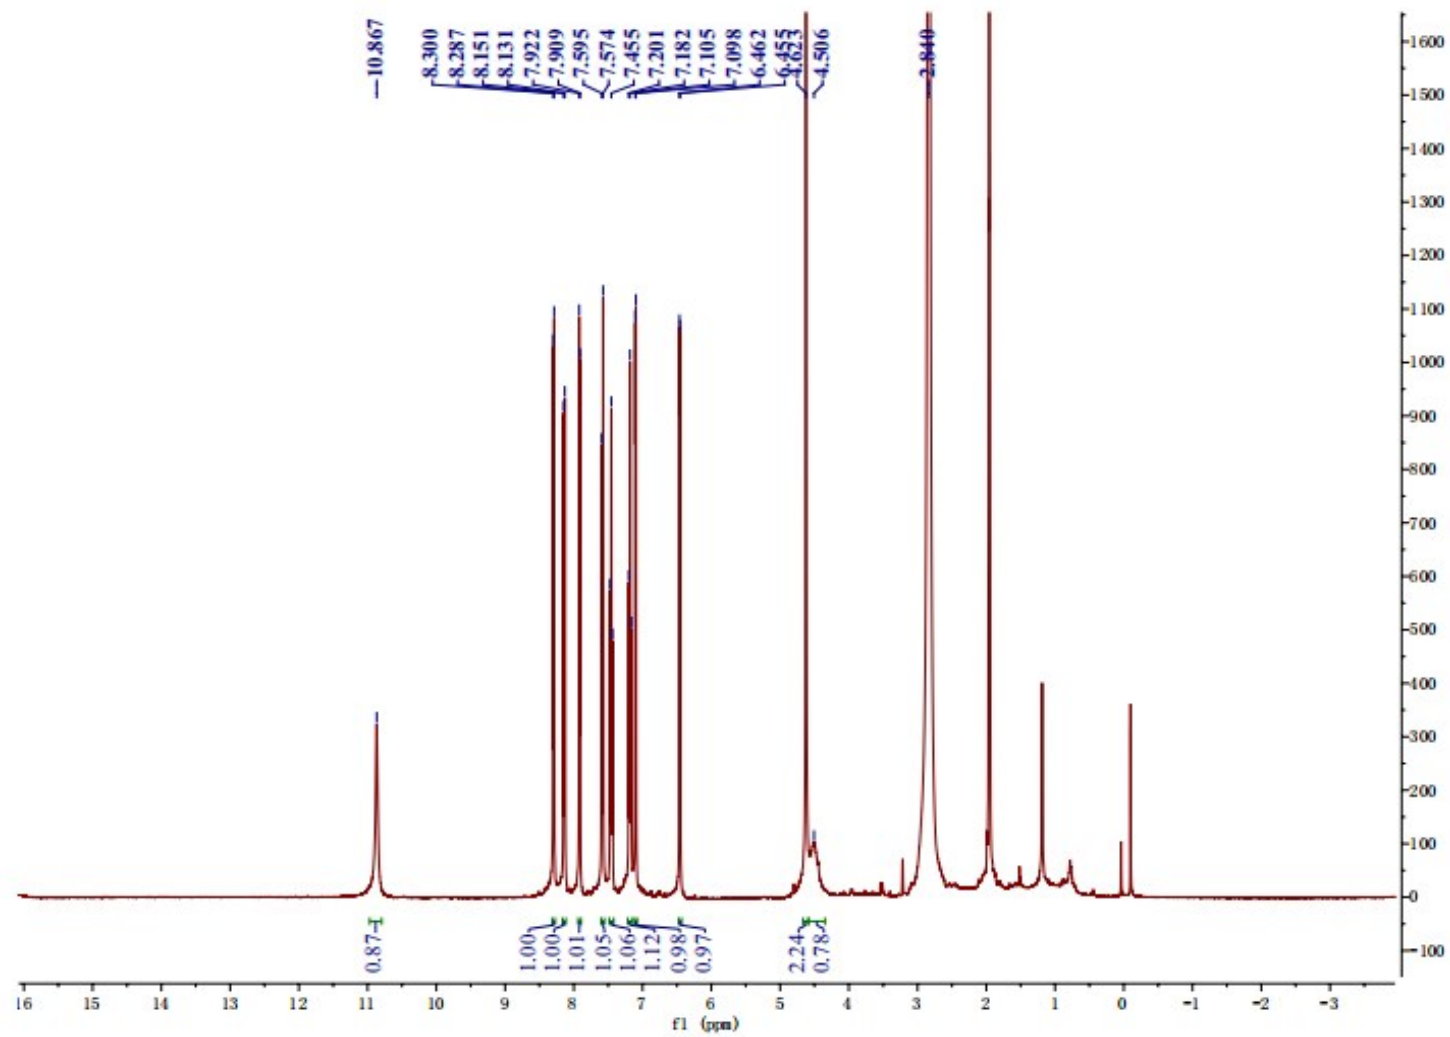

Figure S37.  $^1\text{H}$  NMR spectrum (400 MHz, acetone- $d_6$ ) of perlolyrin (**6**)



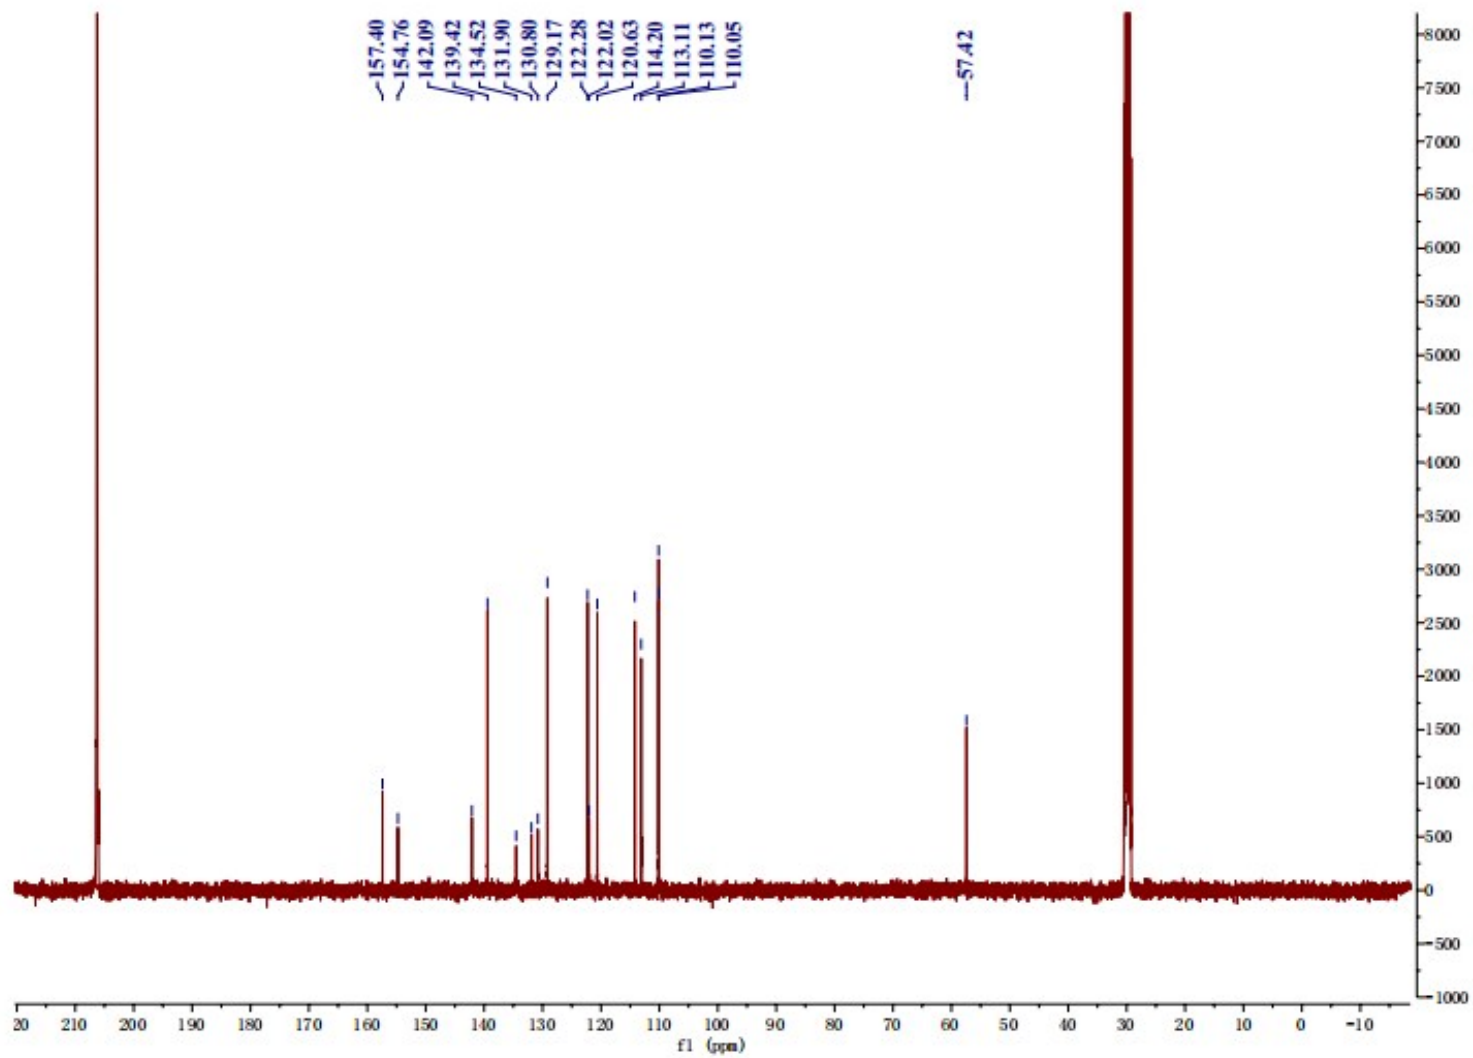

**Figure S38.**  $^{13}\text{C}$  NMR spectrum (100 MHz, acetone- $d_6$ ) of perlolyrin (**6**)

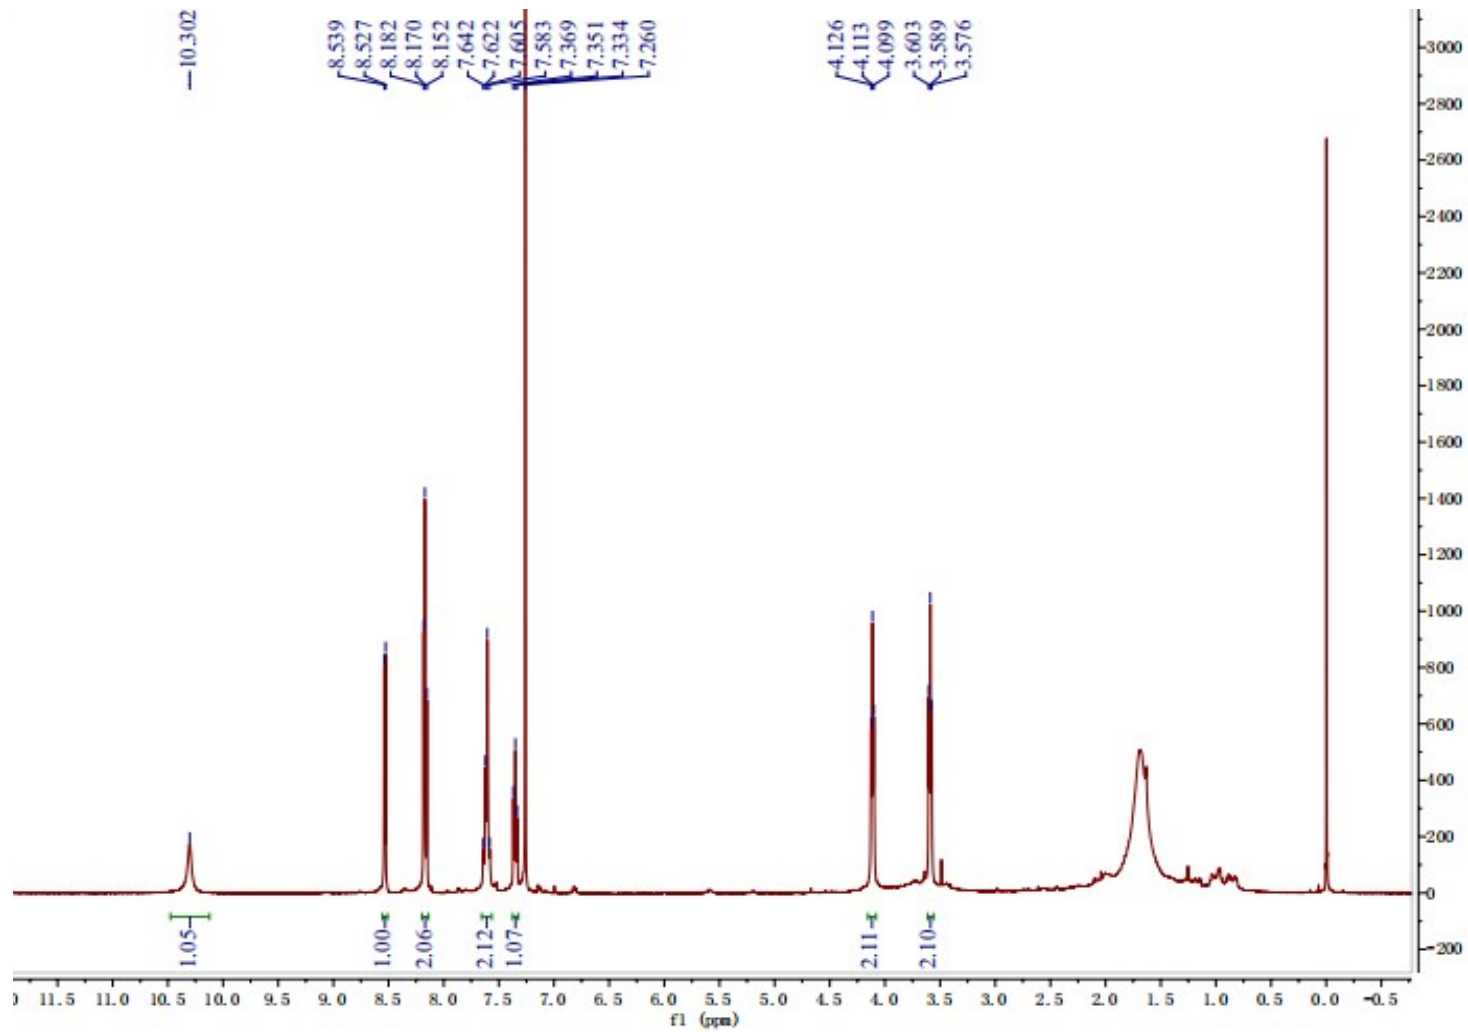

Figure S39. <sup>1</sup>H NMR spectrum (400 MHz, CDCl<sub>3</sub>) of 1-(9*H*-β-carbolin-1-yl)-3-hydroxy-propan-1-one (**7**)

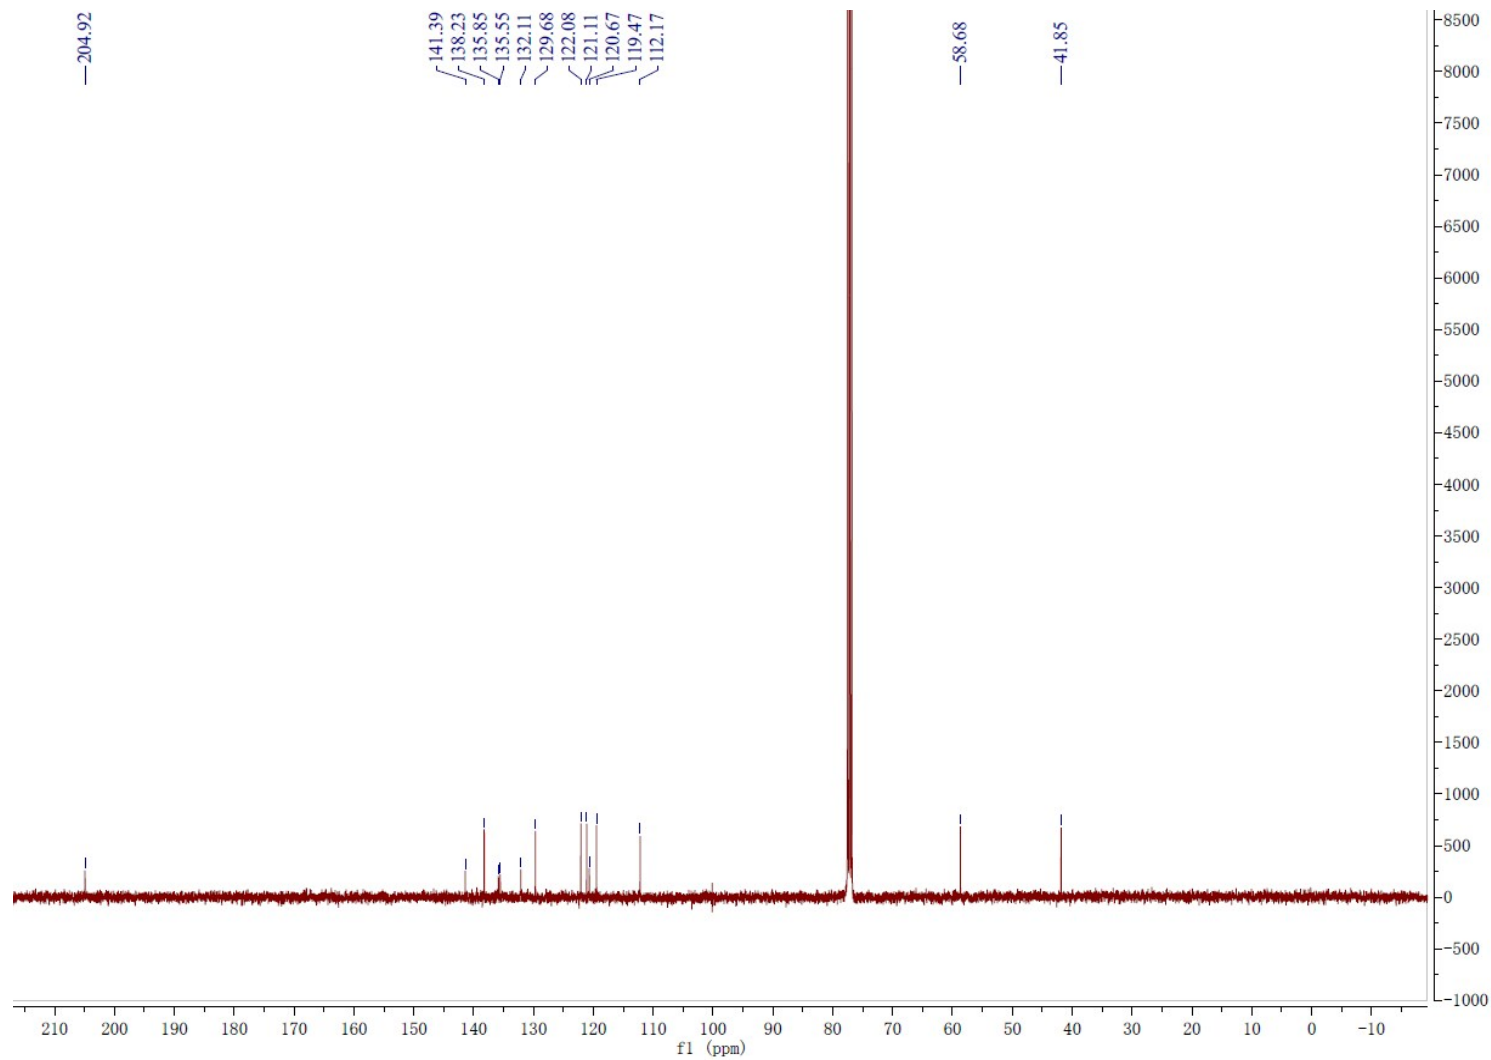

**Figure S40.**  $^{13}\text{C}$  NMR spectrum (100 MHz,  $\text{CDCl}_3$ ) of 1-(9*H*- $\beta$ -carbolin-1-yl)-3-hydroxy-propan-1-one (**7**)

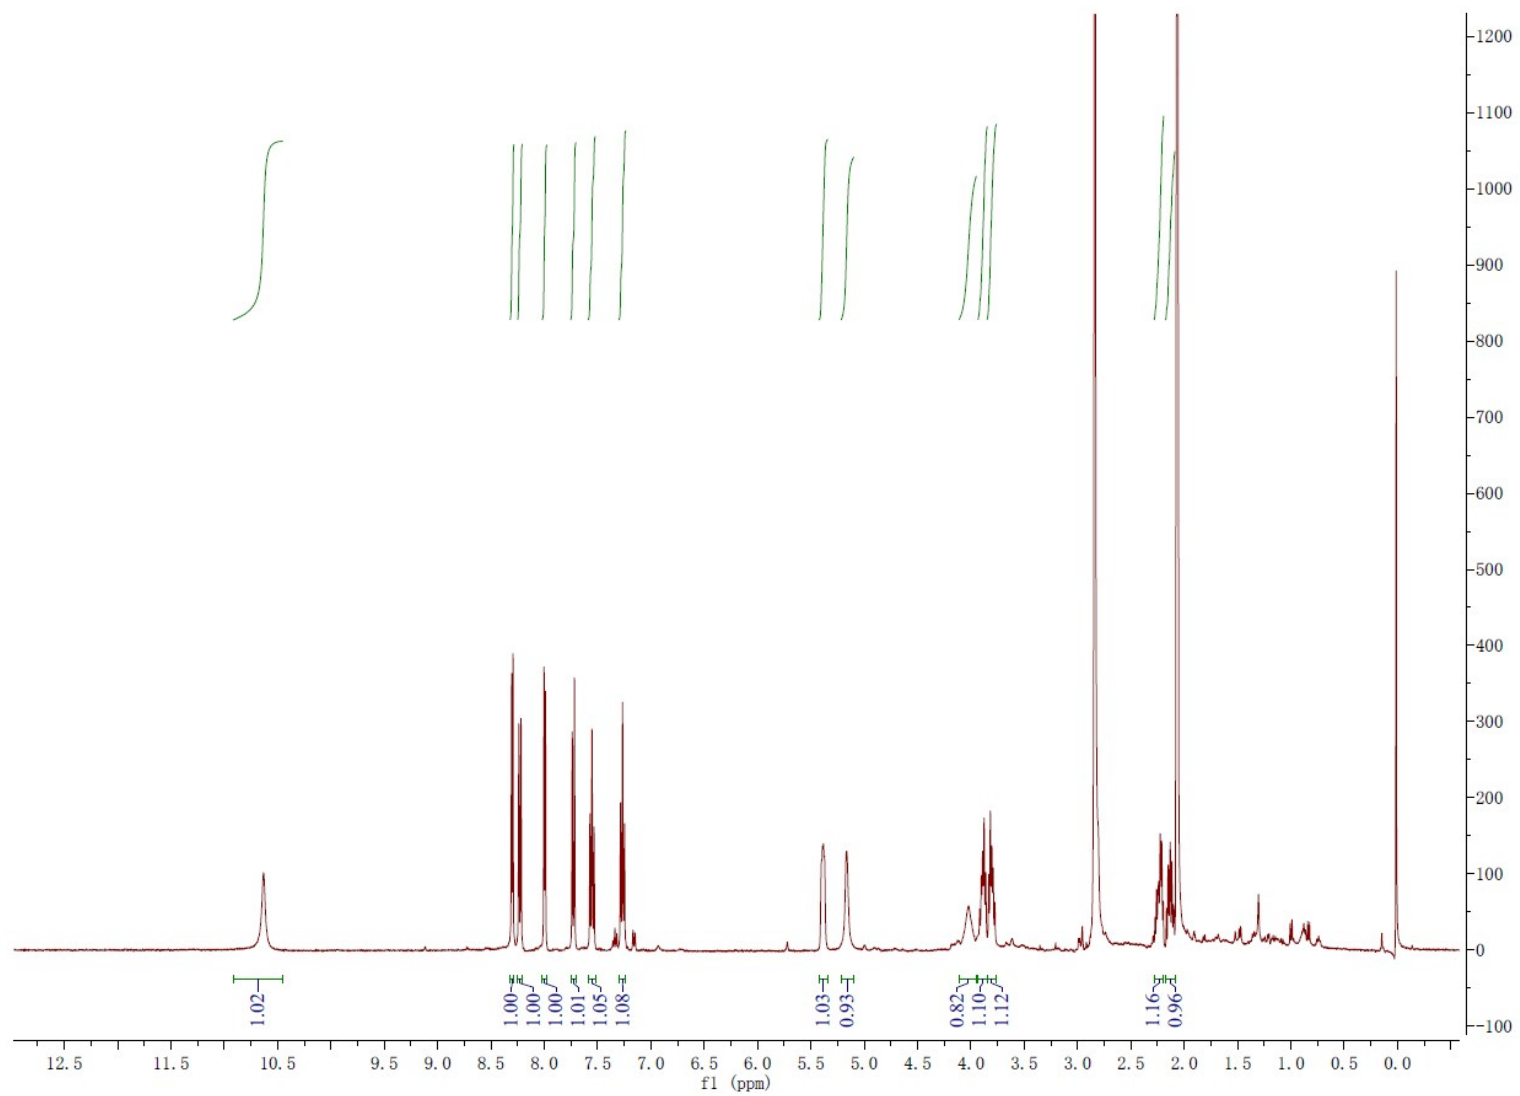

**Figure S41.**  $^1\text{H}$  NMR spectrum (400 MHz, acetone- $d_6$ ) of cordysin E (**8**)

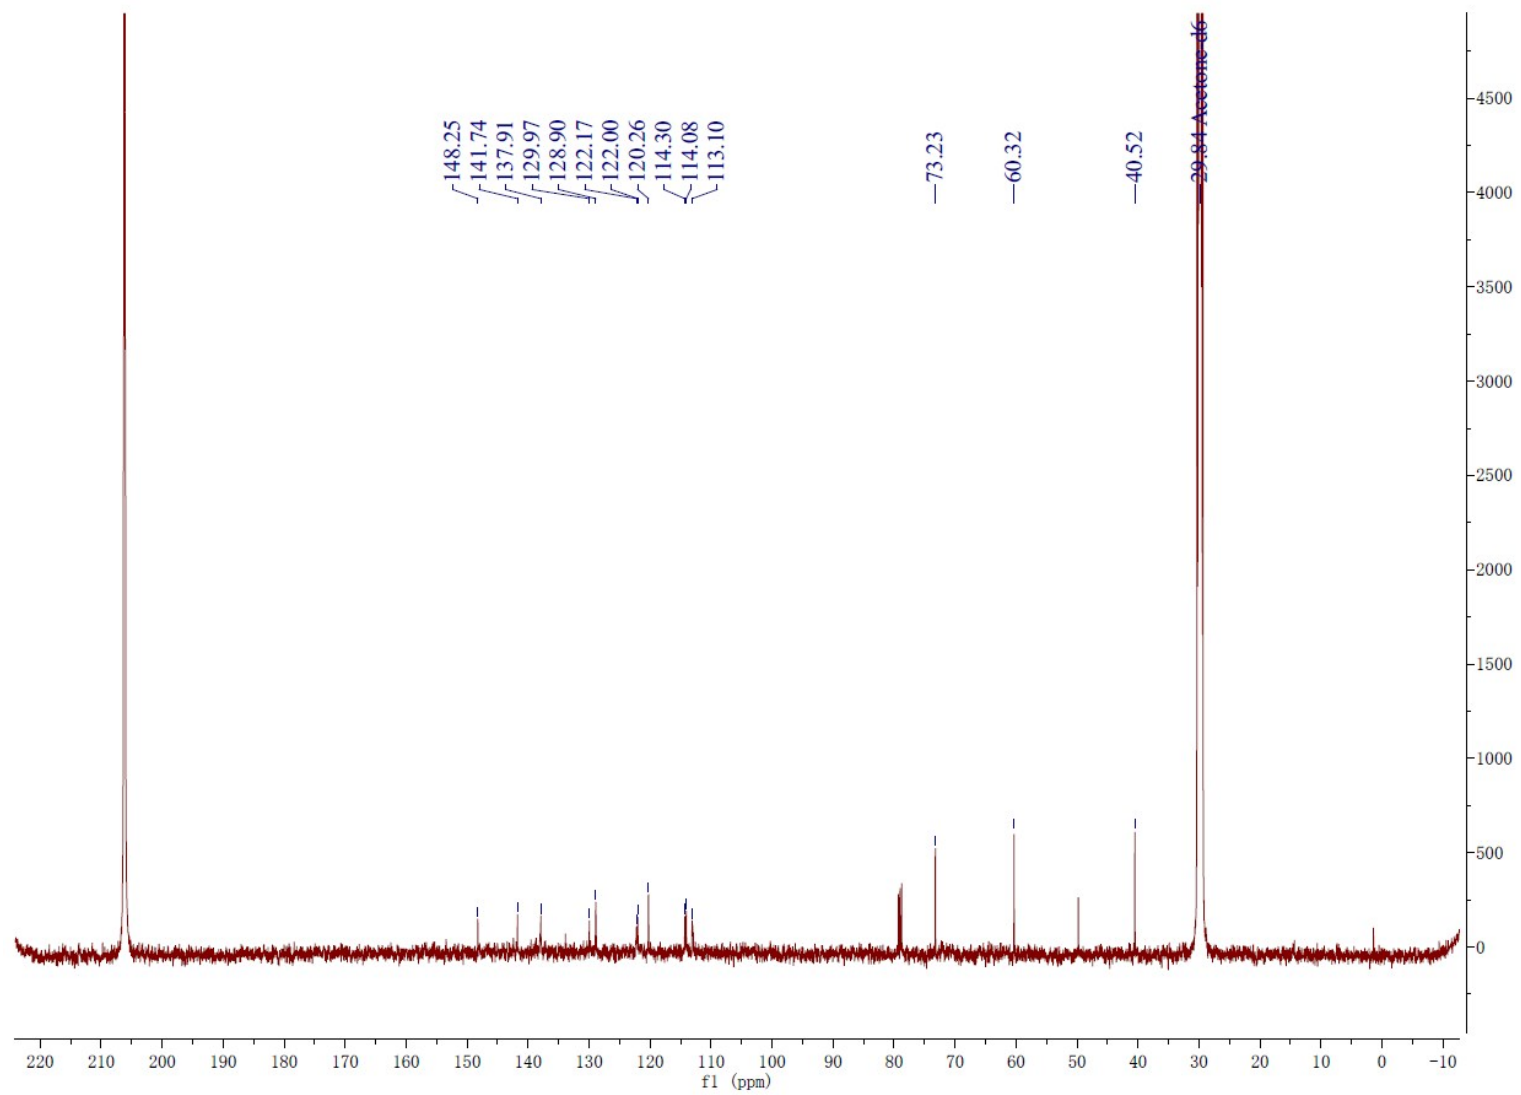

**Figure S42.**  $^{13}\text{C}$  NMR spectrum (100 MHz, acetone- $d_6$ ) of cordysin E (**8**)

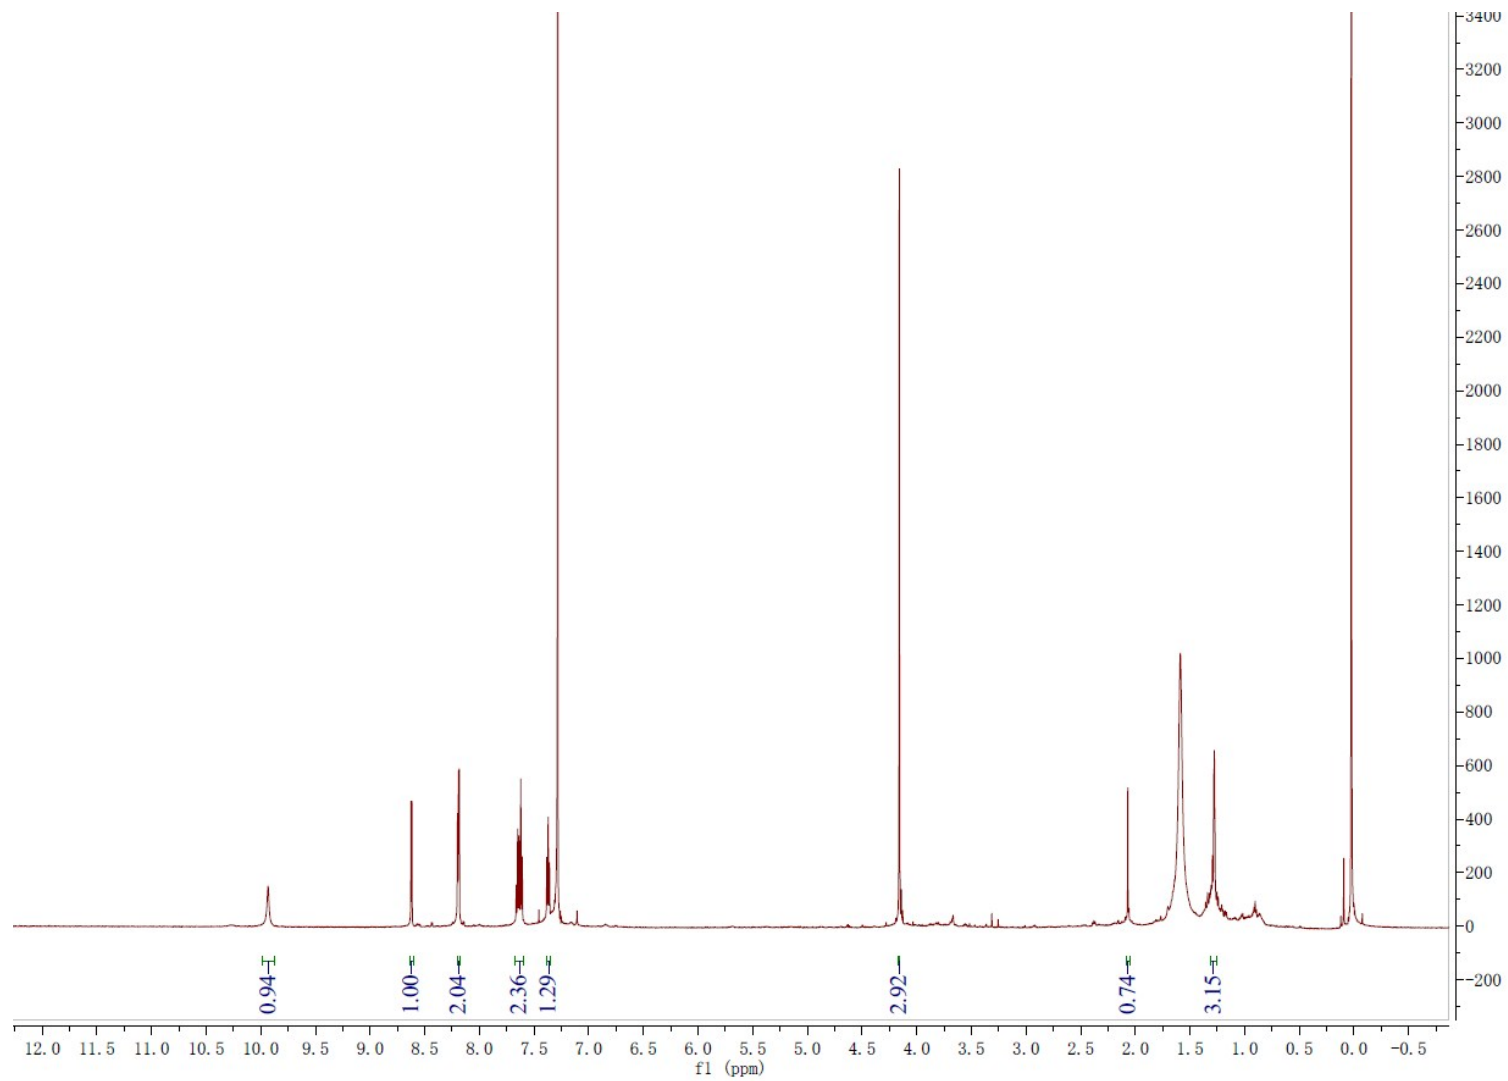

**Figure S43.** <sup>1</sup>H NMR spectrum (400 MHz, CDCl<sub>3</sub>) of 1-methoxycarbonyl-β-carboline (**9**)

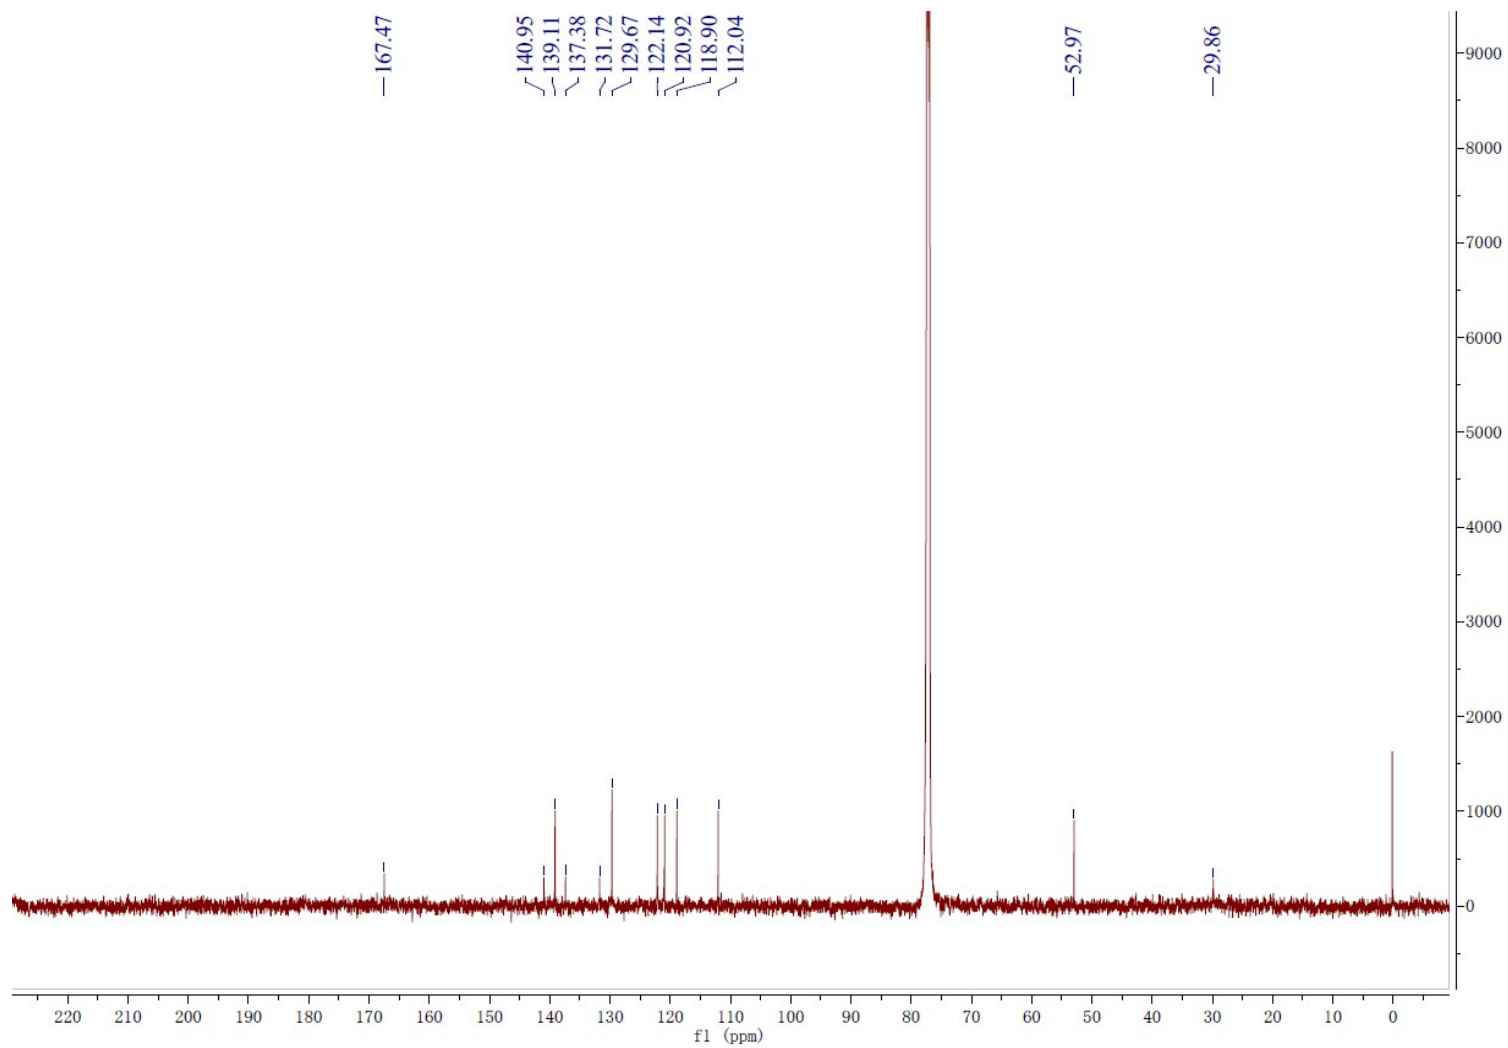

Figure S44. <sup>13</sup>C NMR spectrum (100 MHz, CDCl<sub>3</sub>) of 1-methoxycarbonyl-β-carboline (9)

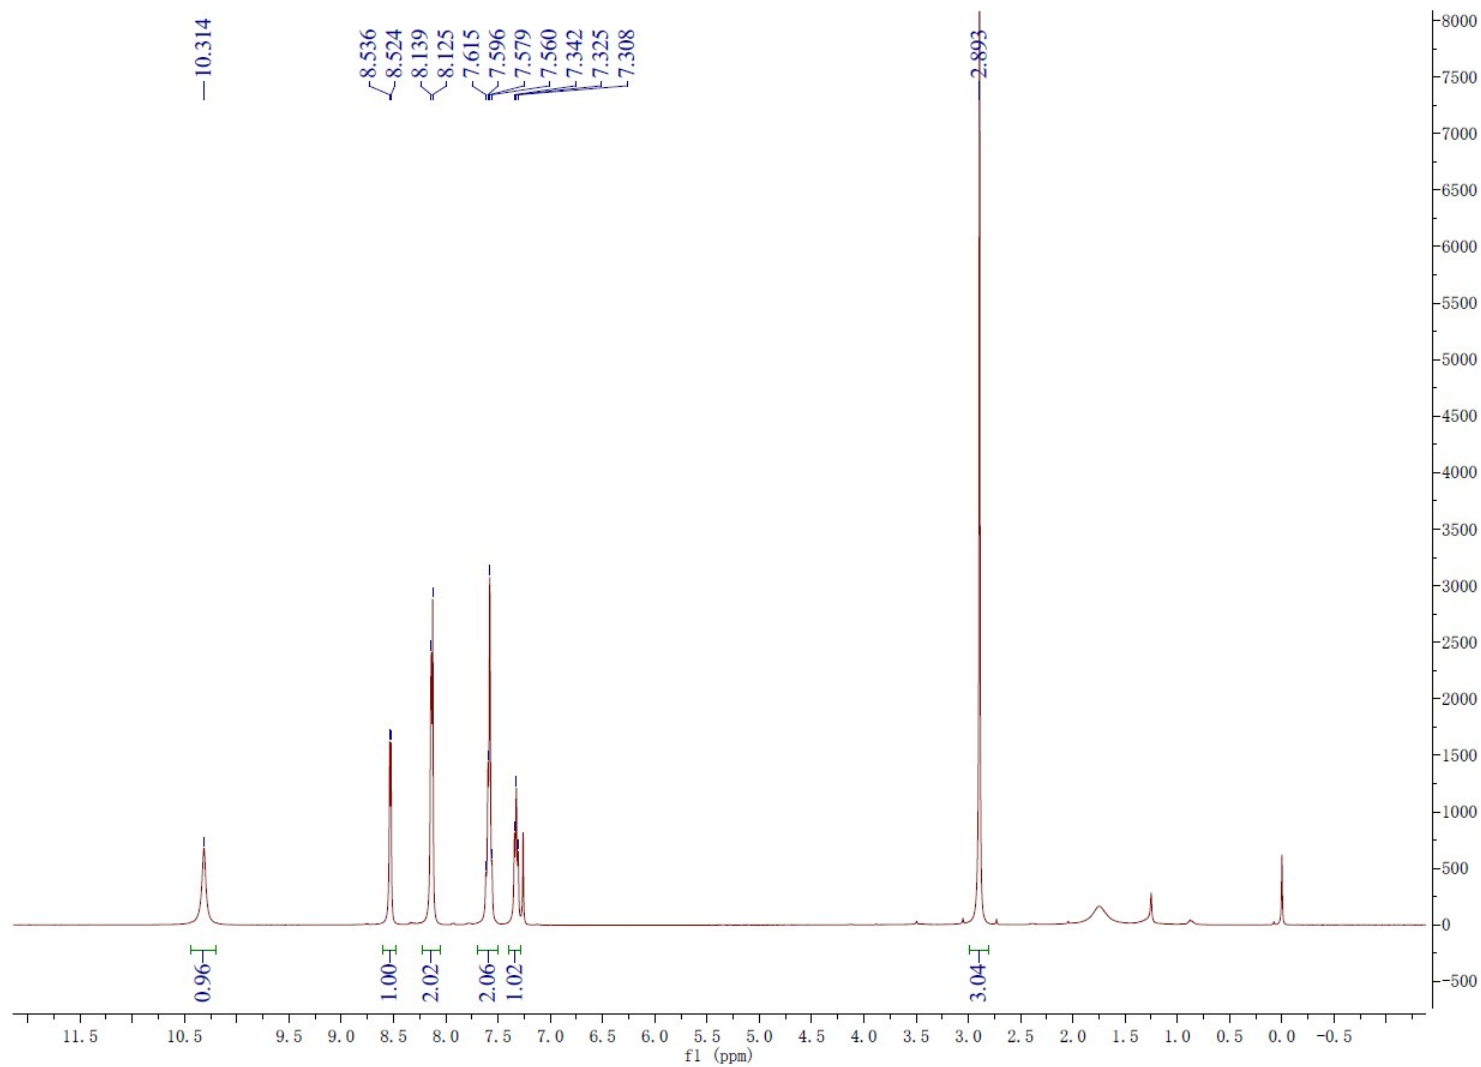

**Figure S45.**  $^1\text{H}$  NMR spectrum (400 MHz,  $\text{CDCl}_3$ ) of 1-acetyl- $\beta$ -carboline (**10**)



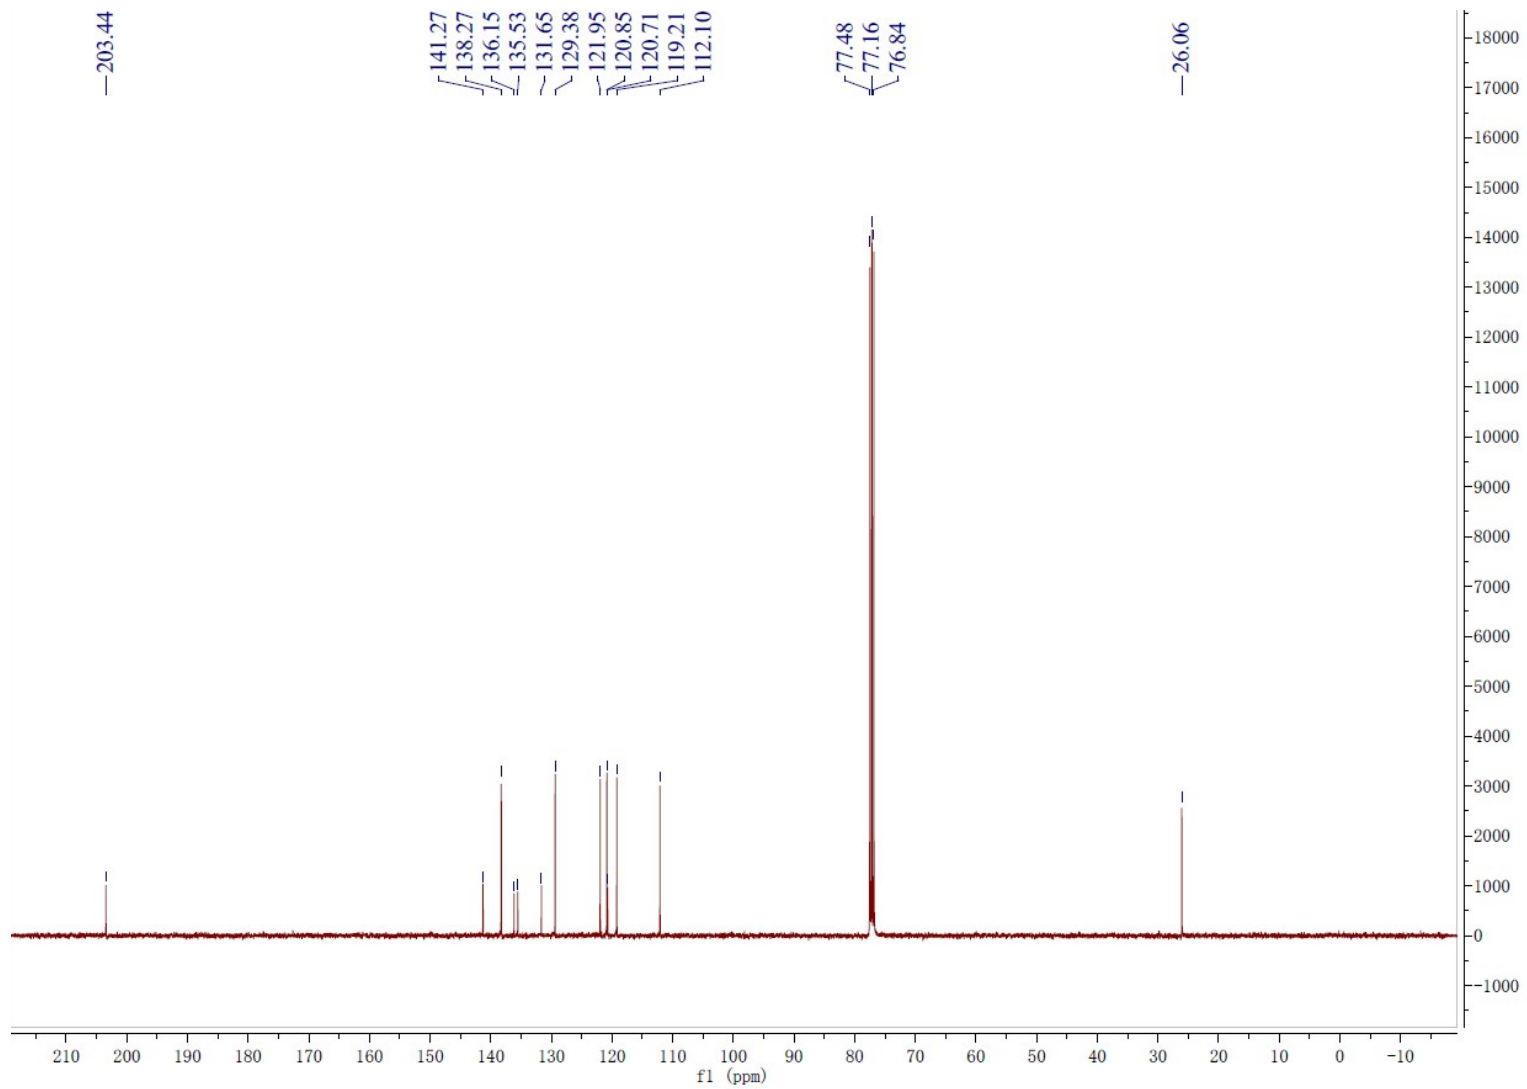

Figure S46.  $^{13}\text{C}$  NMR spectrum (100 MHz,  $\text{CDCl}_3$ ) of 1-acetyl- $\beta$ -carboline (**10**)

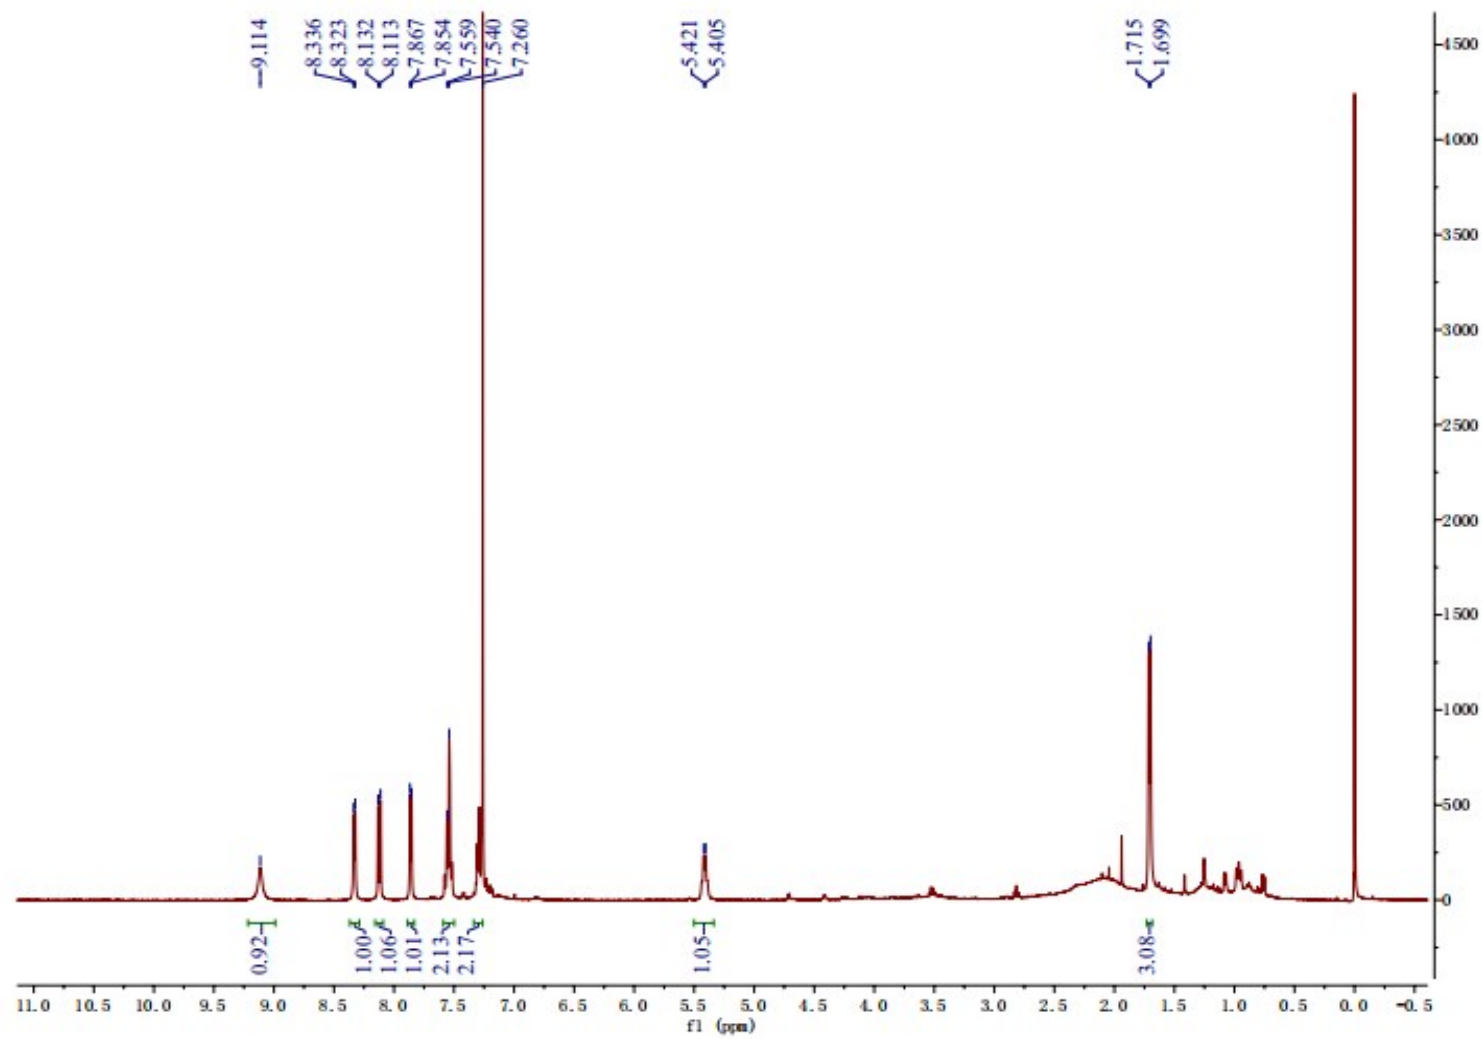

**Figure S47.** <sup>1</sup>H NMR spectrum (400 MHz, CDCl<sub>3</sub>) of cordysin C (**11**)

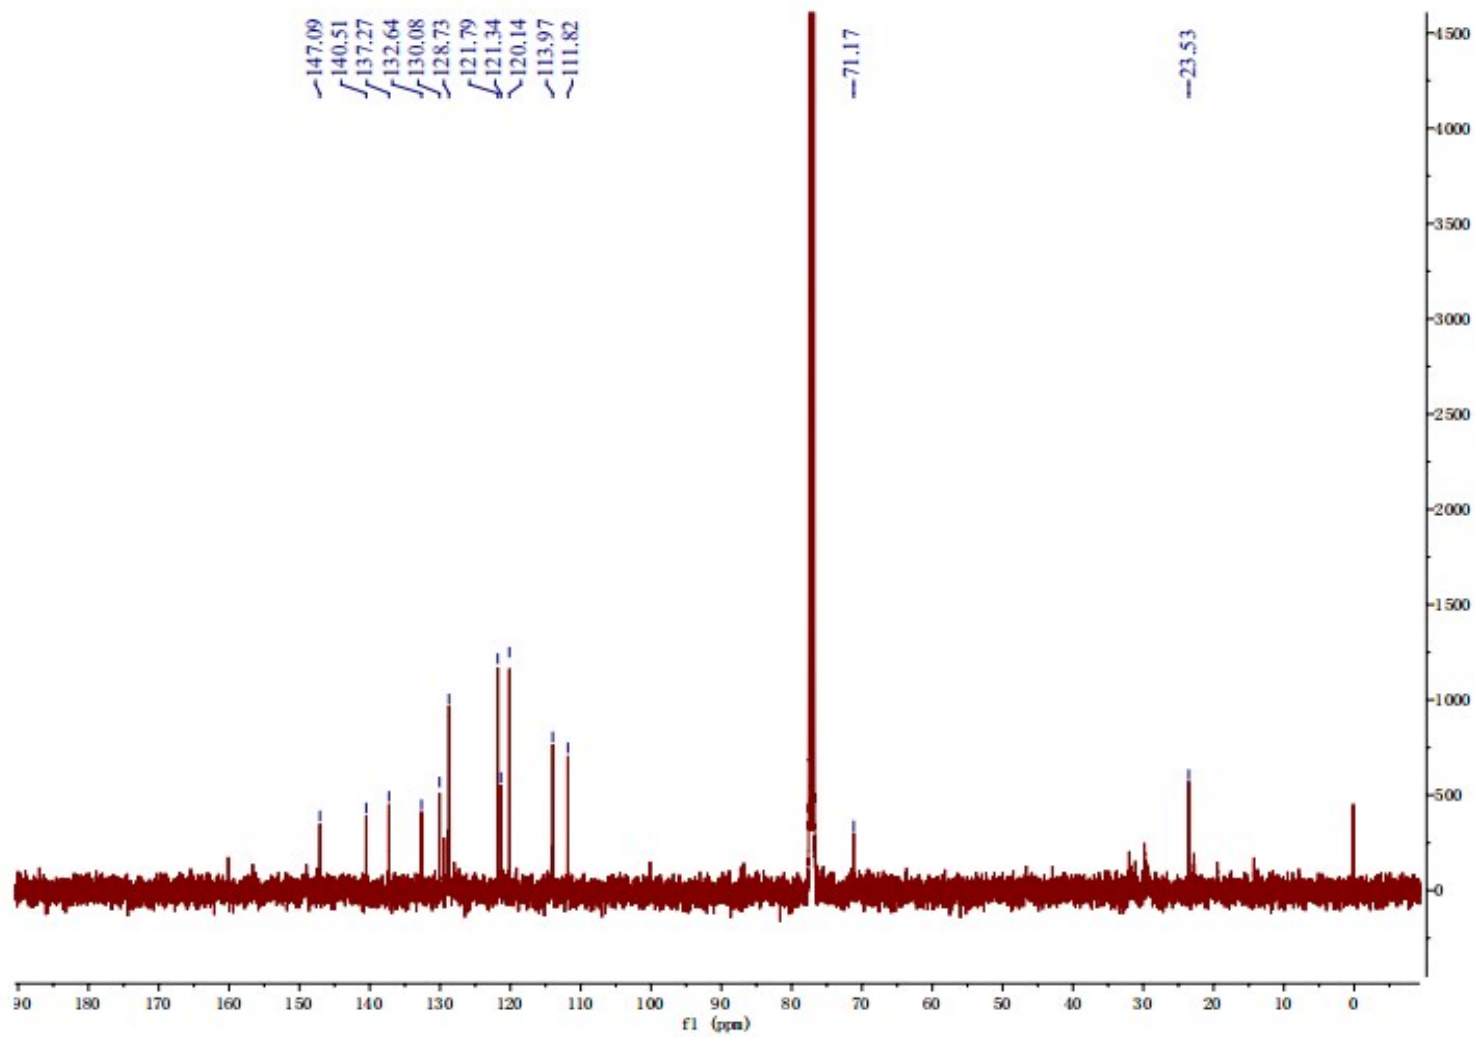

**Figure S48.**  $^{13}\text{C}$  NMR spectrum (100 MHz,  $\text{CDCl}_3$ ) of cordysin C (**11**)

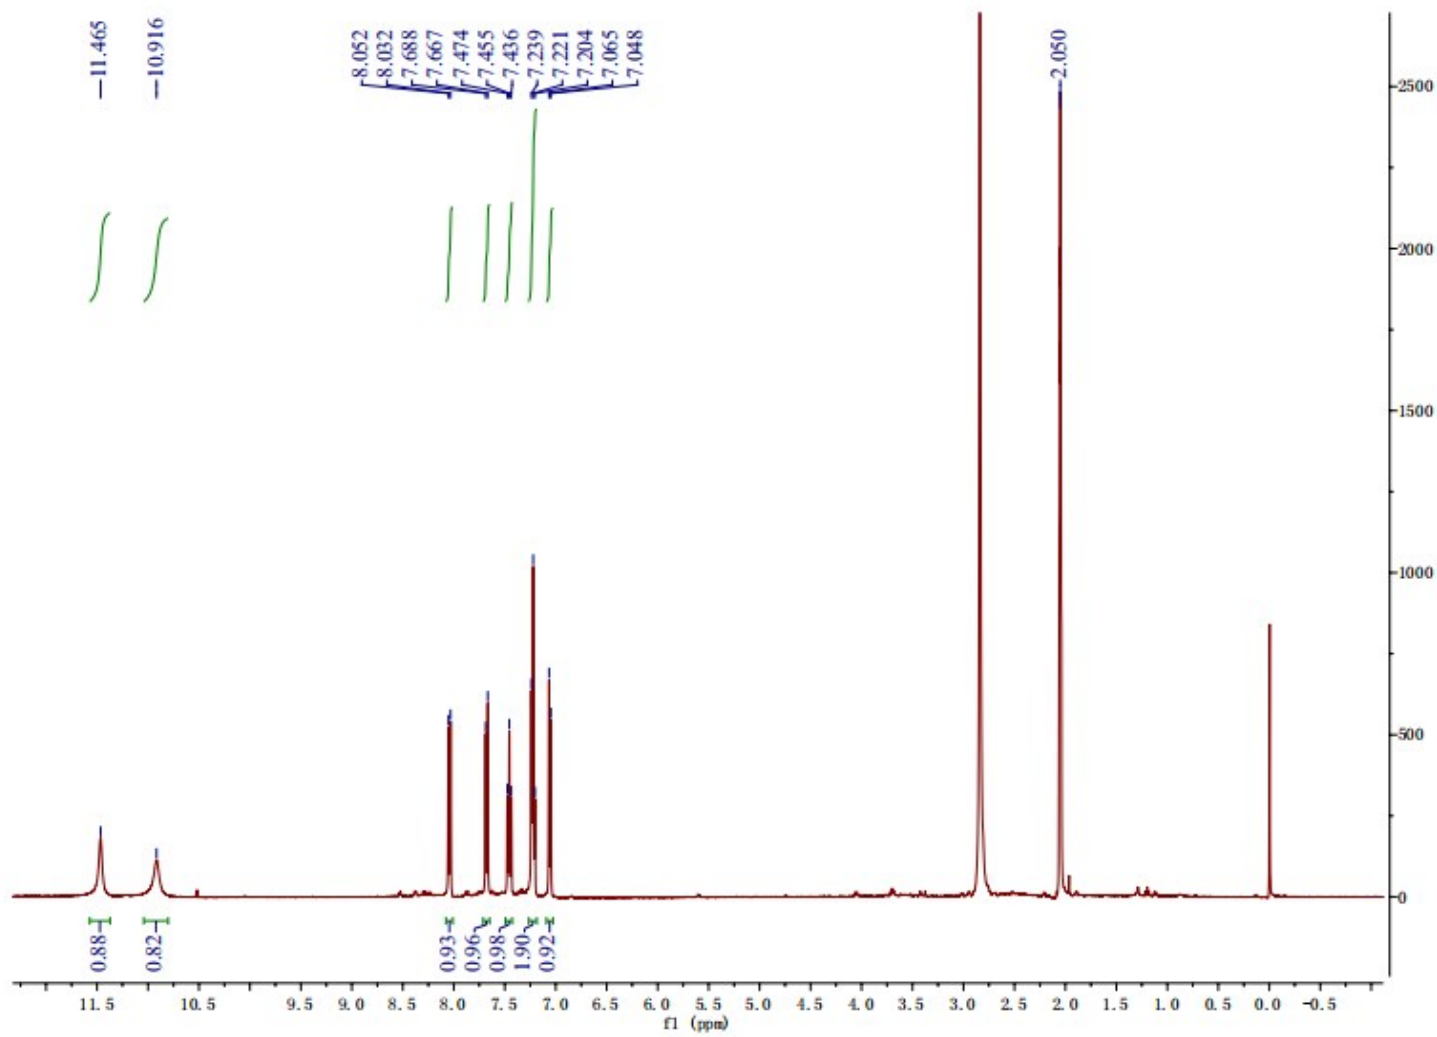

Figure S49.  $^1\text{H}$  NMR spectrum (400 MHz, acetone- $d_6$ ) of 3-hydroxy- $\beta$ -carboline (12)

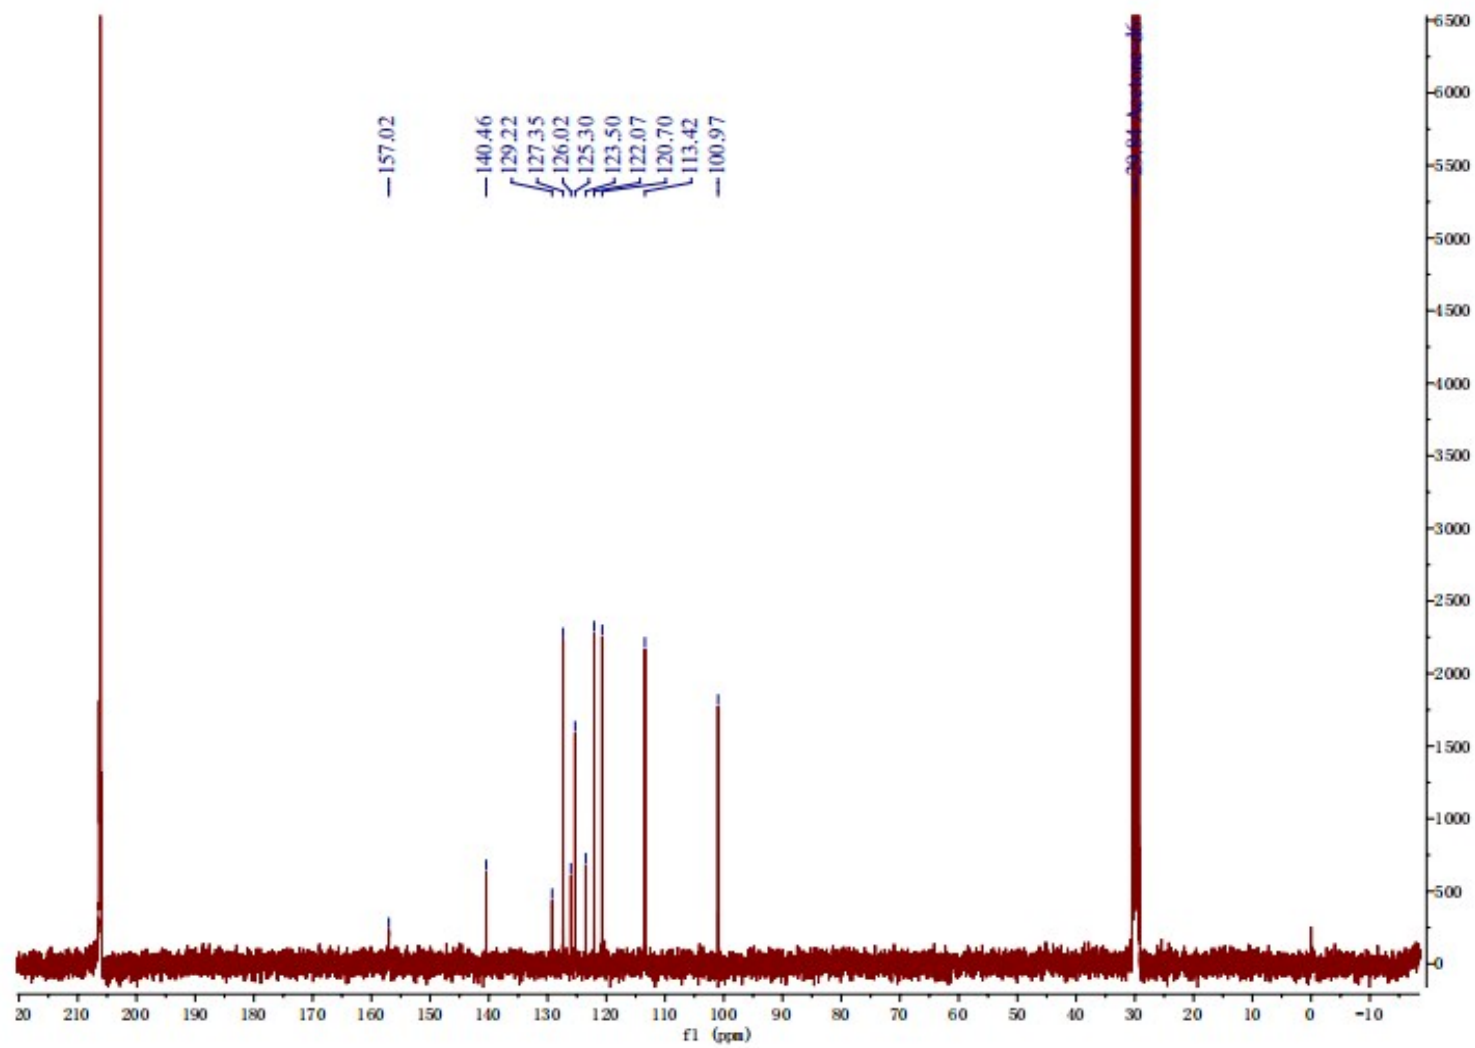

Figure S50.  $^{13}\text{C}$  NMR spectrum (100 MHz, acetone- $d_6$ ) of 3-hydroxy- $\beta$ -carboline (**12**)

**Table S1.** Composition of each nutrient source in different culture media

| Composition of<br>Nutrient Sources* | Culture Media (g/L) |      |      |      |     |     |      |      |
|-------------------------------------|---------------------|------|------|------|-----|-----|------|------|
|                                     | A                   | B    | C    | D    | E   | F   | G    | H    |
| salt                                | 0.0                 | 0.0  | 30.0 | 30.0 | 0.0 | 0.0 | 30.0 | 30.0 |
| glucose                             | 15.0                | 15.0 | 15.0 | 15.0 | 0.0 | 0.0 | 0.0  | 0.0  |
| peptone                             | 10.0                | 10.0 | 10.0 | 10.0 | 0.0 | 0.0 | 0.0  | 0.0  |
| yeast extract                       | 2.0                 | 2.0  | 2.0  | 2.0  | 0.0 | 0.0 | 0.0  | 0.0  |
| L-lysine                            | 0.0                 | 2.0  | 0.0  | 2.0  | 0.0 | 2.0 | 0.0  | 2.0  |
| phenylalanine                       | 0.0                 | 2.0  | 0.0  | 2.0  | 0.0 | 2.0 | 0.0  | 2.0  |
| L-threonine                         | 0.0                 | 2.0  | 0.0  | 2.0  | 0.0 | 2.0 | 0.0  | 2.0  |
| L-tryptophan                        | 0.0                 | 2.0  | 0.0  | 2.0  | 0.0 | 2.0 | 0.0  | 2.0  |
| L-methionine                        | 0.0                 | 2.0  | 0.0  | 2.0  | 0.0 | 2.0 | 0.0  | 2.0  |
| nicotinamide                        | 0.0                 | 1.0  | 0.0  | 1.0  | 0.0 | 1.0 | 0.0  | 1.0  |
| folic acid                          | 0.0                 | 1.0  | 0.0  | 1.0  | 0.0 | 1.0 | 0.0  | 1.0  |

\* In the solid culture medium, the ratio of rice to the solution containing above composition is 60 g: 100 mL

Each kind of liquid culture medium contained 2 L materials in total while the solid one contained 300 g. All the media were sterilized at 120 °C for 30 min. After the fermentation media were cold, fungal mycelia were cut and transferred aseptically into them. The fungi were incubated at 28 °C for 30 days. Then fungi cultured in liquid media were extracted by EtOAc for three times while the solid ones were extracted by MeOH. After concentrated by low-temperature rotary evaporation crude extracts were obtained and the yields of each culture medium were showed in Table S1.

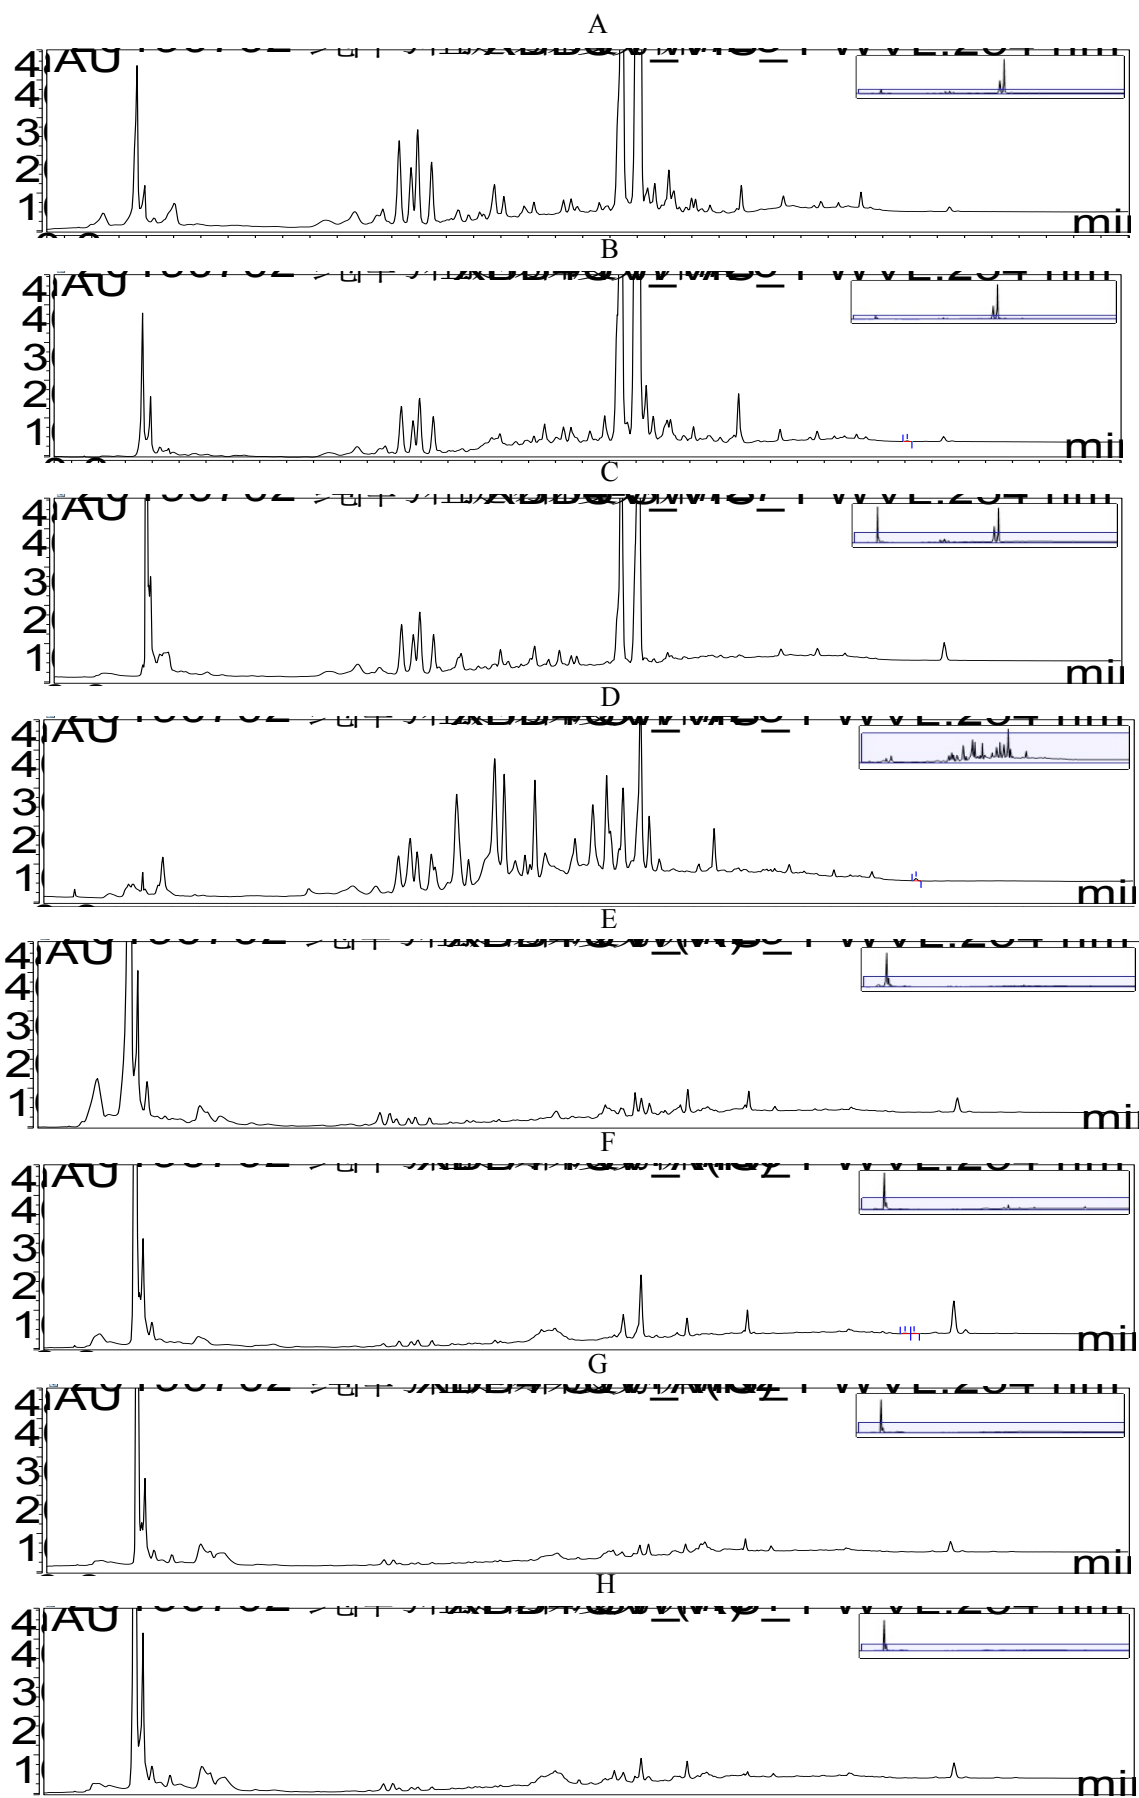

**Figure S51.** HPLC spectra of eight extracts from eight culture media.

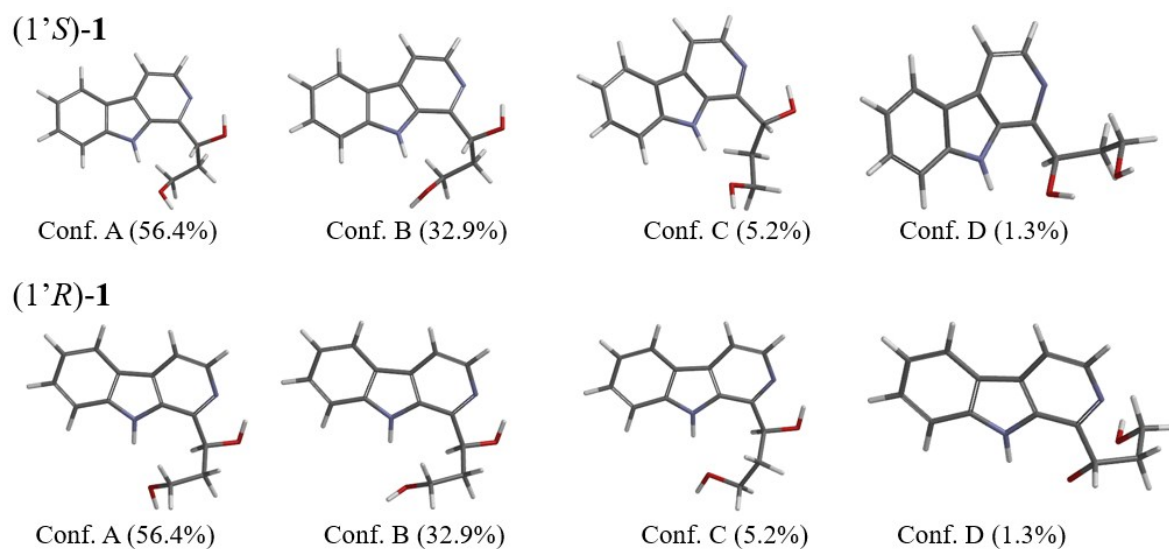

**Figure S52.** The most stable conformers of compound **1** calculated at the B3LYP/6-31+G(d) level. Relative populations are in parentheses.

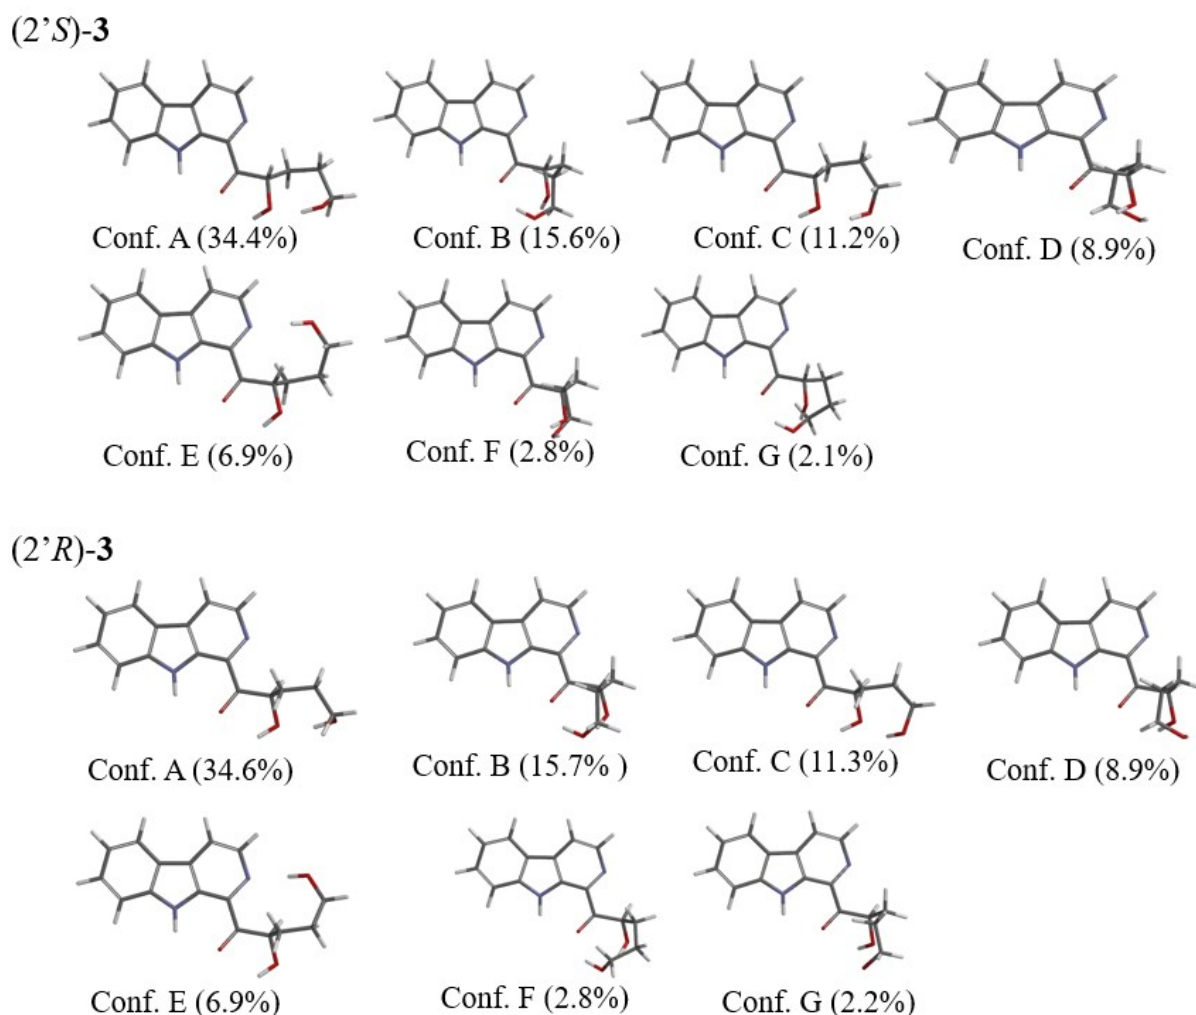

**Figure S53.** The most stable conformers of compound **3** calculated at the B3LYP/6-31+G(d) level. Relative populations are in parentheses.



**(6S)-13**

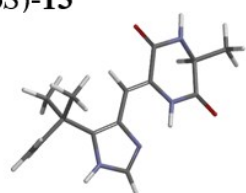

Conf. A (27.5%)

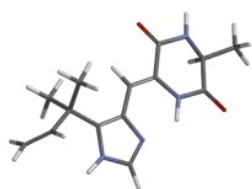

Conf. B (24.4%)

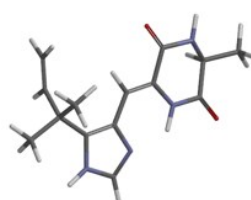

Conf. C (12.7%)

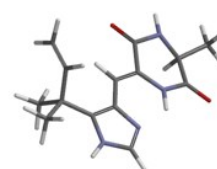

Conf. D (12.1%)

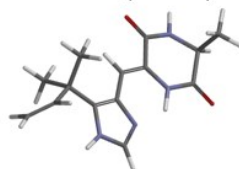

Conf. E (6.9%)

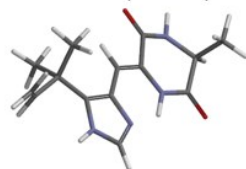

Conf. F (6.1%)

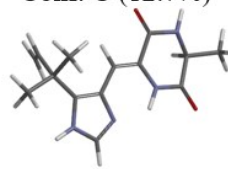

Conf. G (3.2%)

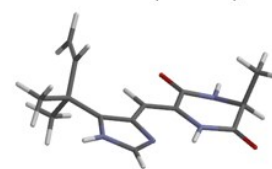

Conf. H (3.2%)

**(6R)-13**

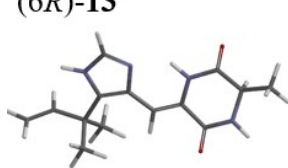

Conf. A (27.4%)

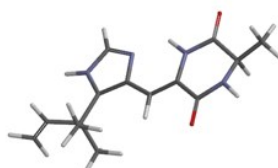

Conf. B (24.4%)

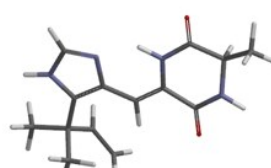

Conf. C (12.7%)

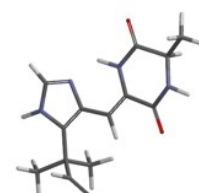

Conf. D (12.1%)

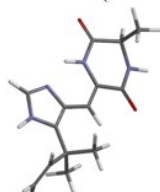

Conf. E (6.9%)

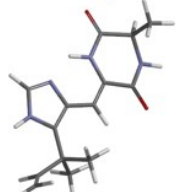

Conf. F (6.1%)

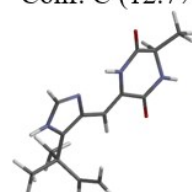

Conf. G (3.4%)

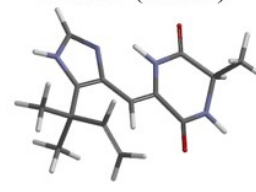

Conf. H (3.2%)

**Figure S54.** The most stable conformers of compound **13** calculated at the B3LYP/6-31+G(d) level. Relative populations are in parentheses.
